# Supplementary material
Source: publisher site journal article supplement (https://www.dovepress.com/article/496064)
Supplement: Supplementary file 1 [file 496064-Revised-Supplemenary-Materials.docx]

**Supplementary Fig. 1.** Multi-dose radiation microscopic images of Het-1A at different time points.


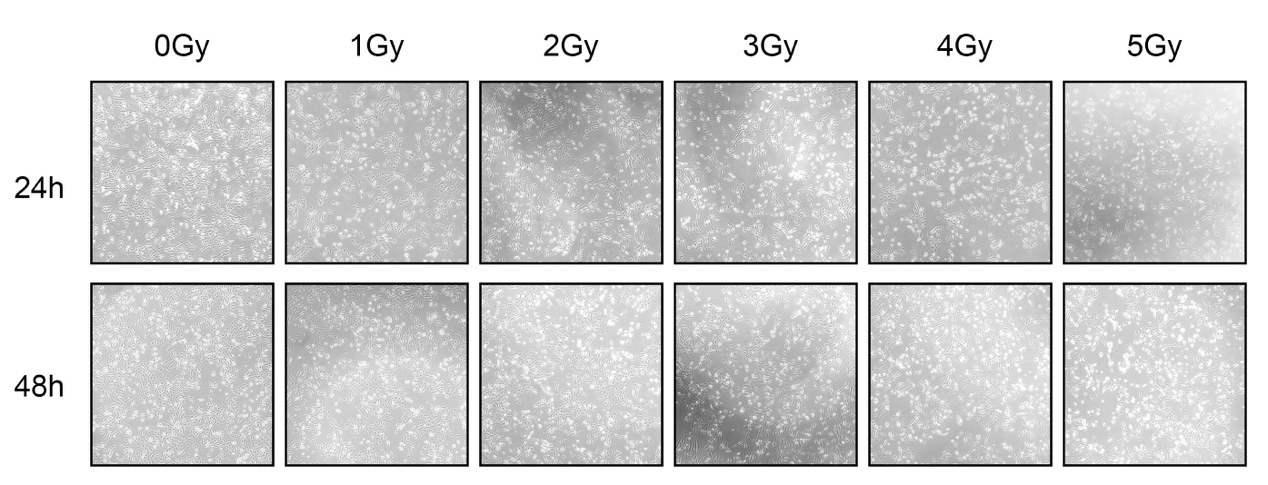


**Supplementary Fig. 2.** t-Distributed Stochastic Neighbor Embedding (t-SNE) plot showing the expression levels of lncRNA (A), miRNA (B), mRNA (C), and circRNA (D) in Het-1A cells exposed to 0, 2, and 4 Gy.


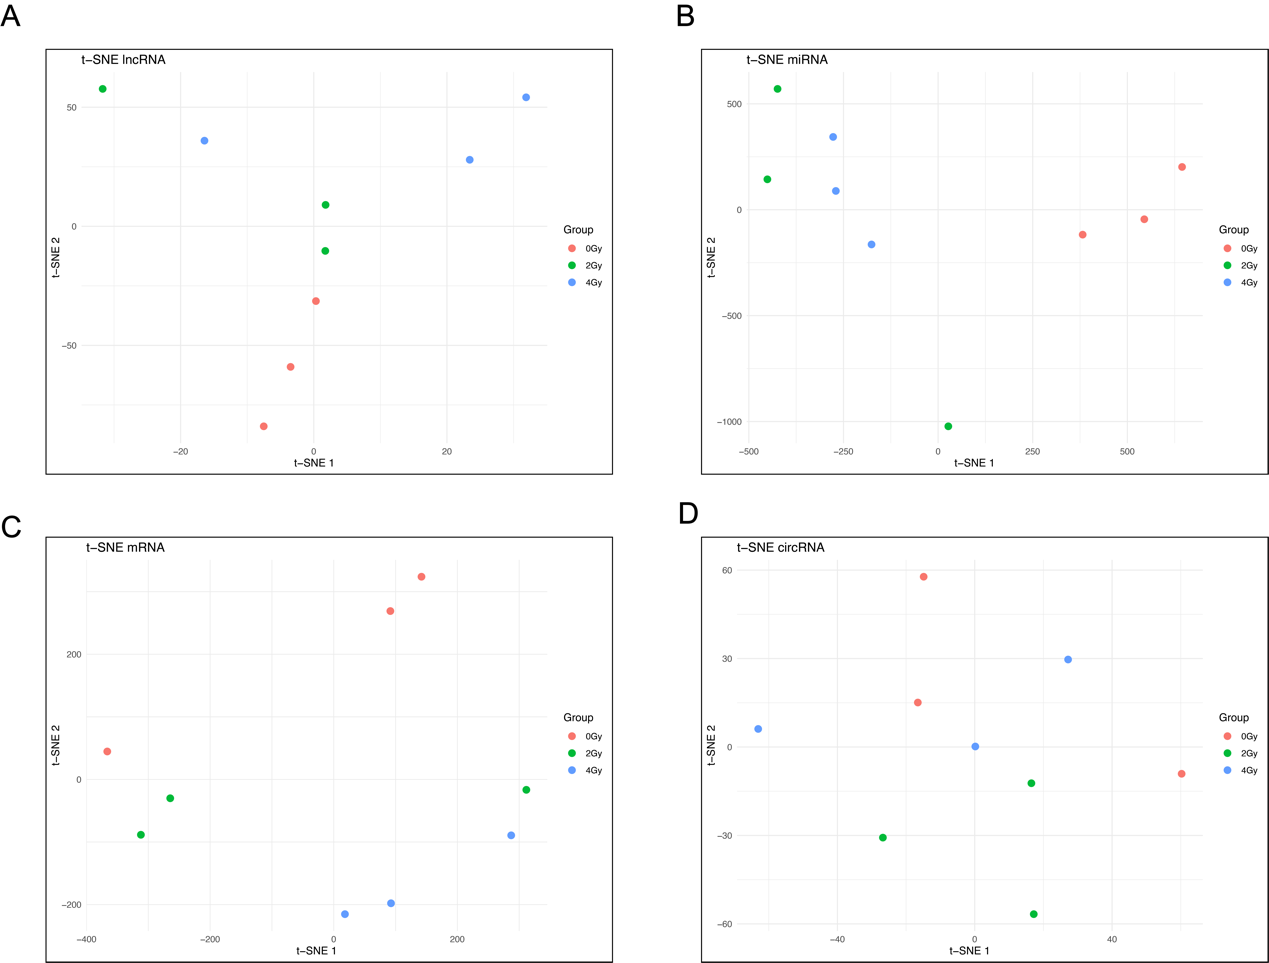


**Supplementary material 1.** Primer sequences.

| Primer name |  | Primer sequences (5’-3’) |
| --- | --- | --- |
| GAPDH | F | TCCTCCACCTTTGACGCT |
|  | R | CCACCACCCTGTTGCTGT |
| U6 | F | CAAATTCGTGAAGCGTTCCA |
|  | R | AGTGCAGGGTCCGAGGTATT |
| IL11 | F | GCTGACGGGGACCACAAC |
|  | R | GCCGCAGGTAGGACAGTAGG |
| NRP2 | F | GGGAAACACAGAATGGCTAC |
|  | R | GCATCGTTGTTGGCTTGA |
| SLC16A7 | F | GGAGGTCCTGTAAGTAGTGTTT |
|  | R | CTGTAATGAATCCCATAGTGAG |
| KANK4 | F | ATCACAACGGGAACACGG |
|  | R | CTTCATTGGTCTCTGCGGA |
| AC048341 | F | GAGGGGCAGAAGAAGTAGACC |
|  | R | TCTCATTCGCGAGTTGCAAAG |
| AL35351 | F | AAAACGTTCGAGTCCCCTCC |
|  | R | CGTTACCGGAGTTAGGTCGG |
| hsa-mir-9902-1-p3_1ss13GC | RT | GTCGTATCCAGTGCAGGGTCCGAGGTATTCGCACTGGATACGACGAGAGA |
|  | F | CGCGCGCTCTCTCTCTCTC |
|  | R | AGTGCAGGGTCCGAGGTATT |
| hsa-miR-2116-3p_L+1R-1 | RT | GTCGTATCCAGTGCAGGGTCCGAGGTATTCGCACTGGATACGACGGAGTT |
|  | F | AATCCGGATCCTCCCATGCCA |
|  | R | AGTGCAGGGTCCGAGGTATT |

**Supplementary material 2.** Identification of differentially expressed RNAs.

**Identification of DELs：**

| 2Gy vs 0Gy | | | | |  | 4Gy vs 0Gy | | | | |  | 4Gy vs 2Gy | | | | |
| --- | --- | --- | --- | --- | --- | --- | --- | --- | --- | --- | --- | --- | --- | --- | --- | --- |
| LncRNAs | logFC | lfcSE | pvalue | padj |  | LncRNAs | logFC | lfcSE | pvalue | padj |  | LncRNAs | logFC | lfcSE | pvalue | padj |
| ZNF674-AS1 | 1.00137872 | 0.44975261 | 0.02598004 | 0.98927899 |  | PHEX-AS1 | -6.165492 | 1.90652333 | 0.00122115 | 0.15363631 |  | LINC01285 | 5.69795893 | 2.24514734 | 0.01115199 | 0.7715622 |
| LINC01285 | -5.2318019 | 2.33600454 | 0.02511451 | 0.97544742 |  | PTCHD1-AS | -1.7520913 | 0.75931731 | 0.02102941 | 0.73632755 |  | INTS6L-AS1 | -6.0162983 | 1.96635249 | 0.00221615 | NA |
| INTS6L-AS1 | 6.03357345 | 1.98395421 | 0.00235648 | 0.29524456 |  | ARMCX5-GPRASP2 | 5.932733 | 2.67485345 | 0.02655718 | 0.82233177 |  | AL139287 | 2.75761628 | 0.65729218 | 2.72E-05 | 0.00900325 |
| WASIR1 | 5.8592609 | 2.78906628 | 0.03565883 | 0.99902059 |  | XACT | 6.01631342 | 2.62890412 | 0.02210695 | 0.74229417 |  | AL358075 | 5.76424998 | 2.01906379 | 0.00430487 | NA |
| AL031731 | 6.61338075 | 1.75646931 | 0.00016645 | 0.06718951 |  | LINC00629 | -2.8611201 | 1.33850587 | 0.03255347 | 0.84164927 |  | LINC00853 | 6.29640183 | 2.64882694 | 0.01745158 | 0.99952776 |
| LINC01355 | 7.24660495 | 1.85420304 | 9.30E-05 | 0.04514399 |  | FAM224B | -1.2743949 | 0.48068942 | 0.00802107 | 0.43599693 |  | AL136985 | 5.84103583 | 2.83247143 | 0.03919161 | NA |
| MATN1-AS1 | 2.68752415 | 0.91798923 | 0.00341567 | 0.34016531 |  | AL391244 | 5.03098704 | 2.46043747 | 0.04087921 | 0.84877911 |  | AL513166 | 5.93596316 | 1.93134788 | 0.00211576 | NA |
| AL591845 | 6.6318484 | 2.42534297 | 0.00624948 | 0.50086146 |  | AL031731 | 5.79416706 | 2.75496109 | 0.03545042 | 0.84164927 |  | TTLL7-IT1 | 6.02803702 | 2.66143002 | 0.02351503 | NA |
| AL033527 | -1.2493865 | 0.62891143 | 0.04696832 | 0.99902059 |  | AL020997 | 5.24738484 | 2.39847259 | 0.02868398 | 0.82589604 |  | AC242426 | 6.48977852 | 2.02510436 | 0.0013522 | 0.15916657 |
| KDM4A-AS1 | 7.94467247 | 1.68198604 | 2.32E-06 | 0.0016767 |  | LINC01756 | -5.5847902 | 2.19073256 | 0.01079457 | 0.46730027 |  | AL590133 | 1.5263873 | 0.70232178 | 0.02975439 | 0.99952776 |
| AL592166 | 1.06284978 | 0.48674995 | 0.02899429 | 0.99902059 |  | MATN1-AS1 | 3.33994408 | 0.5659386 | 3.60E-09 | 3.62E-06 |  | IL6R-AS1 | -3.9742067 | 1.85859081 | 0.03249319 | NA |
| LINC00853 | -5.4670873 | 2.24150519 | 0.01472695 | 0.78265184 |  | AL591845 | 7.22832854 | 1.57459259 | 4.42E-06 | 0.00197707 |  | AL606500 | -1.5867451 | 0.66442262 | 0.01693314 | 0.99952776 |
| DEPDC1-AS1 | 6.25161135 | 2.56288918 | 0.01471645 | 0.78265184 |  | KDM4A-AS1 | 6.99847909 | 2.05551505 | 0.00066229 | 0.09944031 |  | CADM3-AS1 | -3.5992089 | 1.5695714 | 0.02184134 | 0.99952776 |
| TTLL7-IT1 | -5.441584 | 2.17715376 | 0.01244029 | 0.72575827 |  | MGC27382 | -5.9815389 | 2.62458472 | 0.02266457 | 0.75411194 |  | AC093422 | 5.34473208 | 2.26246125 | 0.01815934 | NA |
| AC097059 | 5.55184064 | 2.17713031 | 0.01077004 | 0.68416286 |  | CCDC18-AS1 | -3.1099393 | 1.34661207 | 0.02091837 | 0.73632755 |  | LEMD1-DT | -6.467917 | 1.93773607 | 0.00084422 | 0.11416199 |
| AL160006 | 1.01050292 | 0.36330773 | 0.00541256 | 0.46716364 |  | AC242426 | 5.62460091 | 1.88394853 | 0.00283079 | 0.25187443 |  | AL590101 | -3.1641854 | 1.58814956 | 0.04633021 | 0.99952776 |
| LINC02591 | 7.55912129 | 2.25620934 | 0.00080706 | 0.15832948 |  | AL592424 | 1.67338108 | 0.79729563 | 0.03583265 | 0.84164927 |  | OBSCN-AS1 | 6.4699113 | 2.54598178 | 0.0110465 | 0.7715622 |
| KIAA1614-AS1 | 7.03870627 | 3.01798305 | 0.01968728 | 0.87601116 |  | AL162258 | -10.274204 | 3.90715476 | 0.00854886 | 0.43599693 |  | COA6-AS1 | -2.5610047 | 1.21113499 | 0.03446838 | 0.99952776 |
| AL691482 | 3.76389066 | 1.24936309 | 0.00258979 | 0.30714515 |  | AL606500 | -1.6045587 | 0.73608609 | 0.02926844 | 0.83151862 |  | LINC01348 | -1.0735928 | 0.38538829 | 0.00534052 | 0.44133427 |
| PCAT6 | 3.61317419 | 0.85415323 | 2.34E-05 | 0.01295938 |  | AL137796 | -5.1295116 | 2.39248374 | 0.032032 | 0.84164927 |  | AC069542 | 5.46688719 | 2.21225616 | 0.01346673 | NA |
| COA6-AS1 | 3.01065484 | 1.52649394 | 0.04857904 | 0.99902059 |  | IPO9-AS1 | 1.53998971 | 0.70405549 | 0.02871968 | 0.82589604 |  | AL731575 | -5.9232542 | 2.06083743 | 0.00405055 | NA |
| AL591721 | -5.3577404 | 2.23073819 | 0.01631556 | 0.80309212 |  | AL691482 | 3.63052269 | 1.3795941 | 0.0084987 | 0.43599693 |  | NUTM2B-AS1 | 2.47277815 | 1.24351143 | 0.04675147 | 0.99952776 |
| AL645465 | -5.4425021 | 1.86937028 | 0.00359802 | 0.34936805 |  | LINC02767 | 1.20302322 | 0.60529507 | 0.04686715 | 0.88289525 |  | AL133355 | -3.0361968 | 0.84878424 | 0.00034741 | 0.07382475 |
| LINC01341 | -6.9671462 | 2.32856431 | 0.00277124 | 0.30752889 |  | AL606468 | 4.35507478 | 2.13842855 | 0.04169243 | 0.85167821 |  | AL355531 | 1.59519829 | 0.76563095 | 0.03720493 | 0.99952776 |
| PRKCQ-AS1 | 2.93483261 | 1.38893943 | 0.03460055 | 0.99902059 |  | AC092803 | -4.0064429 | 1.61693289 | 0.01321937 | 0.54307336 |  | MYRF-AS1 | -6.1202099 | 2.70832541 | 0.02383513 | NA |
| MKX-AS1 | -1.9562299 | 0.95761678 | 0.04107118 | 0.99902059 |  | LINC00706 | -2.0540032 | 0.95446655 | 0.03139808 | 0.84118459 |  | LINC00900 | 3.17909583 | 0.97562804 | 0.00111998 | 0.13883094 |
| AC016821 | -5.8968769 | 1.98136417 | 0.00291873 | 0.3148984 |  | AL161935 | -4.9739699 | 2.50546032 | 0.04711645 | NA |  | AP001267 | 4.68633703 | 2.19975154 | 0.03313912 | 0.99952776 |
| BMS1P4 | 1.16090206 | 0.50785305 | 0.02226002 | 0.9296551 |  | BMS1P4 | 1.0740925 | 0.52431979 | 0.04050666 | 0.84877911 |  | PARP11-AS1 | 7.23803425 | 2.28760642 | 0.00155606 | 0.16533104 |
| ZMIZ1-AS1 | -1.6414009 | 0.69401732 | 0.01802656 | 0.86438489 |  | ZMIZ1-AS1 | -1.4292245 | 0.70751886 | 0.04337806 | 0.85759964 |  | AC008115 | 5.57027502 | 2.09933825 | 0.00796976 | NA |
| LINC01561 | 6.67601315 | 3.1611757 | 0.03469703 | 0.99902059 |  | TNKS2-AS1 | -1.7910415 | 0.88615388 | 0.04326522 | 0.85759964 |  | AC024940 | -3.2592562 | 1.43199133 | 0.02284417 | 0.99952776 |
| AC136297 | -1.4340052 | 0.71549992 | 0.04504861 | 0.99902059 |  | AL391425 | 5.71417016 | 2.17164998 | 0.00850696 | 0.43599693 |  | AC012531 | 6.21699434 | 1.19253884 | 1.86E-07 | 0.00013802 |
| MYRF-AS1 | 6.12920607 | 2.66541751 | 0.02147489 | 0.91929675 |  | EDRF1-DT | -5.6762909 | 2.85938515 | 0.04712847 | 0.88289525 |  | AC079866 | 4.38649665 | 2.20316024 | 0.04648066 | NA |
| CACNA1C-AS1 | -3.47301 | 1.64963197 | 0.0352631 | 0.99902059 |  | LINC01165 | -1.8875777 | 0.69862285 | 0.00689538 | 0.43599693 |  | TPT1-AS1 | -3.2492388 | 0.9594189 | 0.00070745 | 0.10941457 |
| PARP11-AS1 | -7.0515719 | 2.28559932 | 0.00203403 | 0.26333918 |  | KCNQ1OT1 | 1.09423467 | 0.42771422 | 0.01051759 | 0.46531646 |  | AL137782 | 8.22024851 | 3.90828045 | 0.0354404 | 0.99952776 |
| A2M-AS1 | 7.25158711 | 2.23982246 | 0.00120551 | 0.19099844 |  | CSTF3-DT | -3.82487 | 1.661358 | 0.02132079 | 0.73632755 |  | MIR17HG | -6.7969075 | 1.72195702 | 7.91E-05 | 0.02138504 |
| AC024896 | -2.8515073 | 1.13908611 | 0.01230311 | 0.72575827 |  | AC090469 | -3.453707 | 1.56047471 | 0.02688102 | 0.82233177 |  | AL353697 | 4.92701575 | 2.45063119 | 0.04437736 | NA |
| AC024940 | 3.28405552 | 1.38314605 | 0.01758047 | 0.853532 |  | AP001001 | 4.10970731 | 1.9706822 | 0.03703086 | 0.84164927 |  | GAS6-DT | -6.4357886 | 1.44188931 | 8.07E-06 | 0.00342778 |
| AC048341 | -1.1676371 | 0.44433901 | 0.00859373 | 0.58557973 |  | AP003027 | 5.03682307 | 2.45877124 | 0.04050983 | 0.84877911 |  | AL161756 | -5.8520295 | 2.77074336 | 0.03467965 | NA |
| LINC02821 | 6.31912476 | 1.87057876 | 0.00072971 | 0.15745549 |  | LINC00900 | 2.54025531 | 0.84560588 | 0.00266398 | 0.25187443 |  | SCG5-AS1 | 5.52435981 | 2.14421366 | 0.0099834 | NA |
| PPP1R12A-AS1 | -1.1813001 | 0.55191692 | 0.0323258 | 0.99902059 |  | CCDC15-DT | 5.99782607 | 1.9844587 | 0.0025078 | 0.24625345 |  | AC005363 | -2.6638332 | 1.1836439 | 0.02441494 | 0.99952776 |
| AL161772 | -1.3336923 | 0.56858739 | 0.01899525 | 0.87545782 |  | A2M-AS1 | 7.42664296 | 2.16667631 | 0.00060879 | 0.09944031 |  | MIR762HG | -2.0997046 | 0.88849523 | 0.01811719 | 0.99952776 |
| AL161714 | -4.2519874 | 2.15812538 | 0.04881286 | 0.99902059 |  | AC008115 | 5.67133125 | 2.11460438 | 0.00731874 | 0.43599693 |  | AC007608 | -5.7212598 | 2.08970115 | 0.00618448 | NA |
| TPT1-AS1 | 6.76997821 | 1.21827821 | 2.74E-08 | 4.11E-05 |  | DENND5B-AS1 | -1.3902891 | 0.58508401 | 0.01749097 | 0.65811817 |  | AC012184 | 2.40613161 | 1.18050773 | 0.04152818 | 0.99952776 |
| AL137782 | -9.605912 | 2.5649484 | 0.00018034 | 0.06718951 |  | AC079684 | 1.89370497 | 0.91578278 | 0.03865377 | 0.84164927 |  | AC027279 | 1.78974024 | 0.77805996 | 0.02143349 | 0.99952776 |
| AL442067 | 6.91049562 | 3.0645339 | 0.02413391 | 0.95649083 |  | AC012531 | 8.73157295 | 1.47247219 | 3.03E-09 | 3.62E-06 |  | VPS9D1-AS1 | 9.96120473 | 2.8239242 | 0.00041961 | 0.07802109 |
| GAS6-DT | 2.41721156 | 1.0266044 | 0.01854417 | 0.86777771 |  | FLJ12825 | 9.04044177 | 1.30245621 | 3.89E-12 | 7.83E-09 |  | FAM106C | 4.9941077 | 2.51032624 | 0.04665423 | NA |
| AL390800 | -3.0675457 | 1.5339447 | 0.04552446 | 0.99902059 |  | AC048341 | -1.1552901 | 0.32270518 | 0.00034357 | 0.06287355 |  | FAM106A | 6.94207169 | 2.42422155 | 0.00418818 | 0.38936979 |
| AC007262 | -6.5277112 | 2.42251802 | 0.00704737 | 0.50688854 |  | LINC02821 | 6.10530709 | 2.61936422 | 0.01976204 | 0.73395848 |  | AC115989 | 1.25852844 | 0.63414241 | 0.04718734 | 0.99952776 |
| AL133467 | 4.57262232 | 1.68262633 | 0.00657671 | 0.50086146 |  | SOCS2-AS1 | -6.5292117 | 2.48322261 | 0.00855533 | 0.43599693 |  | AC007114 | -6.0972488 | 2.69759877 | 0.02380571 | NA |
| AL133523 | 3.73383385 | 1.53696817 | 0.01512592 | 0.78265184 |  | HELLPAR | 1.00958696 | 0.36952692 | 0.00629308 | 0.42226547 |  | AC005962 | -5.1445808 | 2.38478818 | 0.03098631 | NA |
| DIO3OS | -6.0108353 | 2.63971089 | 0.02278139 | 0.9413078 |  | LINC00621 | -5.625185 | 2.81929194 | 0.0460159 | 0.88289525 |  | TBC1D3P1-DHX40P1 | 2.91377248 | 1.10835932 | 0.008566 | 0.65343228 |
| AC068446 | -5.9034978 | 2.67177724 | 0.02713453 | 0.99827847 |  | AL161714 | -4.3505925 | 2.15668154 | 0.04366814 | 0.85759964 |  | TNRC6C-AS1 | -6.743998 | 3.22684422 | 0.03662076 | 0.99952776 |
| AC084782 | -4.4450467 | 2.25655303 | 0.0488568 | 0.99902059 |  | TPT1-AS1 | 3.54982993 | 1.70878864 | 0.03776507 | 0.84164927 |  | RNF213-AS1 | 7.47942594 | 2.22838822 | 0.00078956 | 0.11185449 |
| CT62 | 6.73999975 | 1.80620982 | 0.00019029 | 0.06718951 |  | MIR17HG | -6.6379406 | 3.0800049 | 0.03114837 | 0.84118459 |  | DLGAP1-AS1 | 4.53827817 | 1.27746225 | 0.00038148 | 0.07566076 |
| AC084855 | 6.1363955 | 2.13350212 | 0.00402485 | 0.38128054 |  | AL138955 | 3.95296558 | 1.66136808 | 0.0173435 | 0.65811817 |  | AC090220 | 3.56531657 | 1.59513416 | 0.02540946 | 0.99952776 |
| AC002550 | -2.1581293 | 1.04006108 | 0.03798631 | 0.99902059 |  | AL442067 | 6.56385537 | 3.1216678 | 0.03549412 | 0.84164927 |  | AC018931 | 3.26876099 | 1.496115 | 0.02890111 | 0.99952776 |
| AC025279 | -1.2641528 | 0.63984109 | 0.04818545 | 0.99902059 |  | UBAC2-AS1 | 6.46433131 | 2.65090504 | 0.01474683 | 0.58782905 |  | AC027097 | 6.79050526 | 2.39883736 | 0.00464392 | 0.40634319 |
| CD2BP2-DT | -6.9898054 | 2.32193874 | 0.00260963 | 0.30714515 |  | AL136526 | 3.71237388 | 1.56003826 | 0.01732822 | 0.65811817 |  | AC004449 | 2.1228458 | 1.06013125 | 0.04523778 | 0.99952776 |
| PYCARD-AS1 | -5.6647153 | 2.08441222 | 0.00657462 | 0.50086146 |  | GAS6-DT | -4.0101875 | 1.78883617 | 0.02497522 | 0.79801773 |  | AC008752 | -5.0956622 | 2.39406355 | 0.03329918 | NA |
| AC002519 | -5.3192678 | 2.34255972 | 0.02316469 | 0.94707027 |  | KTN1-AS1 | 3.03528191 | 1.42752485 | 0.03348203 | 0.84164927 |  | AC005387 | -5.6805223 | 2.15506297 | 0.00839154 | NA |
| AC007608 | 5.73622604 | 2.11061336 | 0.00657175 | 0.50086146 |  | PSMA3-AS1 | 5.03237595 | 1.4676214 | 0.00060596 | 0.09944031 |  | LINC01224 | -10.146152 | 3.90721927 | 0.00941047 | 0.68938816 |
| DKFZP434H168 | -3.7268359 | 1.69545785 | 0.02793988 | 0.99902059 |  | AC007262 | -6.6213415 | 2.37643459 | 0.00533217 | 0.38374192 |  | AC008736 | 3.32379069 | 1.63662166 | 0.04226664 | 0.99952776 |
| LINC01572 | 3.45669262 | 1.73750385 | 0.04665057 | 0.99902059 |  | AL583810 | 1.13128118 | 0.48613908 | 0.01996137 | 0.73395848 |  | LIPE-AS1 | 5.61556204 | 2.11424937 | 0.00790608 | NA |
| AC040169 | -6.4102755 | 2.48997271 | 0.01004036 | 0.64994627 |  | AC084782 | -4.6008406 | 2.22243217 | 0.03843524 | 0.84164927 |  | AC138470 | -5.7111992 | 2.15854408 | 0.00814842 | NA |
| VPS9D1-AS1 | -9.0741795 | 1.47590075 | 7.84E-10 | 3.04E-06 |  | AC009554 | -5.6664721 | 2.19166998 | 0.00972495 | 0.46001423 |  | A1BG-AS1 | 1.53986992 | 0.5715691 | 0.00705769 | 0.5674765 |
| FAM106A | -5.5947941 | 2.84363431 | 0.04912788 | 0.99902059 |  | CT62 | 6.87614341 | 2.31216388 | 0.00294041 | 0.25187443 |  | AC016629 | -8.0986629 | 1.59768931 | 4.00E-07 | 0.00023797 |
| AC002094 | 10.1392264 | 3.90722103 | 0.00945918 | 0.63343874 |  | ST20-AS1 | -3.1653137 | 0.72445421 | 1.25E-05 | 0.00501962 |  | AC093690 | -6.1122559 | 2.6746374 | 0.02229728 | NA |
| AC005544 | -3.3051316 | 1.56319346 | 0.03448574 | 0.99902059 |  | AC026624 | 5.75016309 | 2.75968919 | 0.0371941 | 0.84164927 |  | MAP4K3-DT | -3.5929342 | 1.19159312 | 0.0025678 | 0.26342039 |
| AC145343 | 6.657189 | 1.84223638 | 0.00030192 | 0.09772206 |  | WASIR2 | 1.40721118 | 0.61986137 | 0.02319526 | 0.76170085 |  | LINC01291 | 2.83508777 | 1.14992699 | 0.01368412 | 0.87614521 |
| TNRC6C-AS1 | 6.75278164 | 3.11480498 | 0.03016151 | 0.99902059 |  | SNHG19 | -1.1357694 | 0.23302058 | 1.09E-06 | 0.00073338 |  | ST3GAL5-AS1 | -6.1024369 | 1.94291735 | 0.00168451 | NA |
| RNF213-AS1 | -7.3957474 | 2.17726494 | 0.00068177 | 0.15576483 |  | AC141586 | 5.64621794 | 2.85917329 | 0.04829393 | 0.88289525 |  | AC133644 | 1.71864714 | 0.69825456 | 0.01384162 | 0.87614521 |
| AC144831 | -1.518058 | 0.32292921 | 2.59E-06 | 0.0016767 |  | AC004034 | -1.896709 | 0.90189841 | 0.03546415 | 0.84164927 |  | AC104134 | -6.8045636 | 2.43866077 | 0.00526613 | 0.44133427 |
| AC090220 | -3.3818939 | 1.65502189 | 0.04101154 | 0.99902059 |  | LINC01569 | 1.13865495 | 0.49761715 | 0.02212501 | 0.74229417 |  | THORLNC | -5.3046247 | 2.33720795 | 0.02322933 | NA |
| AC100847 | -5.465707 | 2.18877599 | 0.01251952 | 0.72575827 |  | LINC02177 | 5.64857986 | 2.8251149 | 0.04556337 | 0.88191398 |  | AC133785 | 5.76468376 | 2.88973105 | 0.04605532 | NA |
| AC036176 | 6.7051692 | 3.14903426 | 0.03323127 | 0.99902059 |  | RRN3P2 | 2.34482568 | 1.0191001 | 0.02139849 | 0.73632755 |  | AC013468 | 4.77543296 | 1.92163027 | 0.0129517 | NA |
| LINC00683 | 1.58663987 | 0.74840627 | 0.03400395 | 0.99902059 |  | MIR762HG | -2.5569634 | 0.75141987 | 0.00066689 | 0.09944031 |  | AC105760 | 3.82605608 | 1.81324756 | 0.03485343 | NA |
| LINC01775 | -4.8852928 | 1.77247541 | 0.00584776 | 0.48324908 |  | AC009107 | -4.6208745 | 1.48838322 | 0.00190519 | 0.20730551 |  | MCM8-AS1 | 5.99489476 | 2.6853863 | 0.02558759 | NA |
| LINC01535 | -7.2521288 | 2.25169136 | 0.00127857 | 0.19099844 |  | AC027279 | 1.61237428 | 0.76290076 | 0.03455984 | 0.84164927 |  | AL034422 | -5.9883922 | 2.81290067 | 0.0332623 | NA |
| AC245748 | -6.9946065 | 2.46686251 | 0.00457646 | 0.41337132 |  | AC002094 | 10.072342 | 3.90721089 | 0.0099407 | 0.46001423 |  | OSER1-DT | -6.9132066 | 2.04776914 | 0.00073556 | 0.10941457 |
| IGFL2-AS1 | -6.58629 | 3.15749558 | 0.03698568 | 0.99902059 |  | AC004585 | 6.34402835 | 3.22589561 | 0.04922999 | 0.88482109 |  | LINC01275 | -5.8361661 | 2.8286689 | 0.03909174 | NA |
| LINC01106 | 2.20772914 | 0.9071119 | 0.01494124 | 0.78265184 |  | ASB16-AS1 | -3.9834305 | 2.0305182 | 0.04978807 | 0.88724679 |  | BTG3-AS1 | -4.0040067 | 1.2526203 | 0.00139104 | 0.15916657 |
| THORLNC | 5.32413418 | 2.35817388 | 0.02396212 | 0.95649083 |  | AC007114 | -5.8388419 | 2.71284292 | 0.03137402 | 0.84118459 |  | IL10RB-DT | 1.43587814 | 0.6295364 | 0.02255732 | 0.99952776 |
| AL109976 | 1.57407911 | 0.70892956 | 0.02639431 | 0.9893719 |  | AC005544 | -6.9385386 | 1.74009566 | 6.68E-05 | 0.02240745 |  | AP000320 | 2.4624173 | 1.22520755 | 0.04445278 | 0.99952776 |
| MCM8-AS1 | -5.7047979 | 2.10925943 | 0.00683774 | 0.50688854 |  | AC145343 | 6.46741112 | 2.4493754 | 0.00828002 | 0.43599693 |  | AP001062 | -6.20182 | 2.65710634 | 0.01959309 | NA |
| OSER1-DT | 5.12436529 | 1.74353548 | 0.00329203 | 0.34016531 |  | AC005837 | 1.13435577 | 0.51484143 | 0.02757284 | 0.82589604 |  | TSPEAR-AS1 | 5.8171624 | 2.79810031 | 0.03762025 | NA |
| LINC01275 | 5.85958726 | 2.78344458 | 0.03527766 | 0.99902059 |  | LINC01979 | 3.503762 | 1.50733314 | 0.02009991 | 0.73395848 |  | LINC01664 | 3.37952101 | 1.64888725 | 0.04040575 | 0.99952776 |
| MHENCR | -2.2330648 | 0.84781923 | 0.00844122 | 0.58545874 |  | AC144831 | -1.4053393 | 0.30226279 | 3.33E-06 | 0.00167536 |  | MIATNB | 3.31874973 | 1.58240829 | 0.03596899 | NA |
| FP236240 | 2.21518295 | 1.05521111 | 0.03579228 | 0.99902059 |  | DLGAP1-AS1 | 2.89435385 | 0.98230525 | 0.00321401 | 0.26831954 |  | LINC01638 | -5.9791286 | 2.73150621 | 0.02860053 | NA |
| CR381653 | -2.9845539 | 1.04476868 | 0.00428118 | 0.39590696 |  | AC036176 | 6.73270213 | 3.05135786 | 0.02735174 | 0.82589604 |  | OGFRP1 | -2.2004463 | 0.76274249 | 0.00391521 | 0.37573385 |
| BTG3-AS1 | 4.67149195 | 1.31013771 | 0.00036296 | 0.09990292 |  | LINC01775 | -3.239307 | 1.64084681 | 0.04836266 | 0.88289525 |  | LIMD1-AS1 | -1.5128111 | 0.39517832 | 0.0001291 | 0.0320055 |
| AP000320 | -2.4416805 | 1.17857517 | 0.03829134 | 0.99902059 |  | AC005387 | -6.5825991 | 1.79551791 | 0.00024625 | 0.05342963 |  | PTPRG-AS1 | -6.5729024 | 3.31426332 | 0.04734323 | 0.99952776 |
| ZNF295-AS1 | 7.99105513 | 1.44468692 | 3.18E-08 | 4.11E-05 |  | AC005394 | -3.7472992 | 1.55972372 | 0.01628164 | 0.63640652 |  | ZBTB11-AS1 | -1.6353943 | 0.20423329 | 1.17E-15 | 3.48E-12 |
| AJ239328 | 1.74234154 | 0.36161182 | 1.45E-06 | 0.00140612 |  | AC008474 | 1.17670433 | 0.5717928 | 0.03959773 | 0.8479812 |  | LINC02021 | -5.8675714 | 2.80287638 | 0.03631251 | NA |
| AC002470 | 7.32176143 | 2.26756123 | 0.00124261 | 0.19099844 |  | LINC01535 | -7.3468252 | 2.20739937 | 0.00087387 | 0.12564937 |  | AC117395 | 6.04259471 | 1.93068517 | 0.00174945 | NA |
| MGAT3-AS1 | 2.72697793 | 1.24262269 | 0.02819703 | 0.99902059 |  | AC245748 | -7.0941994 | 2.41686285 | 0.00333233 | 0.26831954 |  | AC084212 | 3.12634758 | 1.50022864 | 0.03716798 | 0.99952776 |
| PRR34-AS1 | -1.4692218 | 0.59306514 | 0.01323671 | 0.74509249 |  | IGFL2-AS1 | -6.669681 | 3.07050746 | 0.02984243 | 0.84017919 |  | AC069224 | 1.24517192 | 0.49547507 | 0.01196798 | 0.79121675 |
| SATB1-AS1 | -5.351274 | 2.22844553 | 0.01633478 | 0.80309212 |  | AC008622 | -2.0865221 | 1.00337165 | 0.03757044 | 0.84164927 |  | CTBP1-DT | 3.29361444 | 0.74549211 | 9.96E-06 | 0.00370386 |
| LIMD1-AS1 | 1.05513459 | 0.43628002 | 0.01558549 | 0.7861566 |  | AC010619 | -2.8694476 | 1.23759131 | 0.02041812 | 0.73395848 |  | AC116651 | 5.61621767 | 1.6372956 | 0.00060318 | 0.09969263 |
| CYB561D2 | 4.66740509 | 1.6930541 | 0.00583707 | 0.48324908 |  | AC005261 | -4.3284031 | 1.62783352 | 0.00783738 | 0.43599693 |  | STIM2-AS1 | 5.25412242 | 2.49995127 | 0.03558045 | NA |
| AC006252 | -7.3981408 | 2.21661977 | 0.00084512 | 0.15832948 |  | A1BG-AS1 | 1.87588859 | 0.60744254 | 0.0020139 | 0.21336756 |  | KLF3-AS1 | -5.6766844 | 2.85612899 | 0.04686205 | NA |
| LINC02021 | 5.8769457 | 2.7626685 | 0.03339754 | 0.99902059 |  | AC016629 | -6.897584 | 1.81560613 | 0.00014525 | 0.04176975 |  | AC021127 | 5.97212446 | 1.92352658 | 0.00190421 | NA |
| TMEM108-AS1 | -6.41726 | 1.81659985 | 0.00041155 | 0.09990292 |  | AC009236 | -6.0340962 | 2.05520341 | 0.00332464 | 0.26831954 |  | THAP9-AS1 | -3.8230961 | 0.96698674 | 7.70E-05 | 0.02138504 |
| LINC00880 | -3.7882908 | 1.48840077 | 0.01092124 | 0.68416286 |  | AC016747 | 4.5285287 | 2.14941132 | 0.03512891 | 0.84164927 |  | AC110813 | 3.96554931 | 1.56895198 | 0.0114873 | 0.77669806 |
| CTBP1-DT | -3.0907299 | 1.05526238 | 0.00340193 | 0.34016531 |  | LINC01943 | 1.36691457 | 0.45769543 | 0.00282176 | 0.25187443 |  | LINC02211 | 2.22723237 | 1.09599043 | 0.04213705 | 0.99952776 |
| KLF3-AS1 | 5.69589524 | 2.81742733 | 0.04321093 | 0.99902059 |  | LINC01106 | 2.28098046 | 0.82229991 | 0.00553881 | 0.39121515 |  | LIFR-AS1 | 4.90314153 | 1.49968103 | 0.00107754 | 0.13883094 |
| AC034139 | -6.2946412 | 1.8880127 | 0.00085606 | 0.15832948 |  | AC079753 | 3.16747848 | 1.43134779 | 0.02690218 | 0.82233177 |  | AC010623 | 5.70448466 | 2.84129848 | 0.04467482 | NA |
| AC021127 | -5.1462796 | 2.40433945 | 0.0323214 | 0.99902059 |  | AC009948 | 1.29528323 | 0.46494002 | 0.00533769 | 0.38374192 |  | AC106786 | -3.823393 | 1.61290976 | 0.01776433 | 0.99952776 |
| AC093599 | -2.4710912 | 1.18380563 | 0.03685082 | 0.99902059 |  | AC010680 | 2.08816528 | 1.02126833 | 0.04088658 | 0.84877911 |  | AC008663 | -5.9290164 | 2.77574065 | 0.03267841 | NA |
| SLC9A3-AS1 | -7.1026441 | 2.0038338 | 0.00039332 | 0.09990292 |  | AL034422 | -5.662531 | 2.18909781 | 0.0096901 | 0.46001423 |  | AL392183 | 5.63095941 | 2.14120773 | 0.00854338 | NA |
| AC099499 | -4.9149165 | 2.462154 | 0.04591372 | NA |  | PLCG1-AS1 | 1.54676393 | 0.5852048 | 0.0082147 | 0.43599693 |  | LINC00240 | -6.055806 | 2.0653895 | 0.00336743 | NA |
| AC026741 | -6.0651823 | 1.96055636 | 0.00197742 | 0.26333918 |  | SLC12A5-AS1 | 2.46956299 | 1.21359942 | 0.04186015 | 0.85167821 |  | DDX39B-AS1 | -7.2734907 | 2.29621153 | 0.001537 | 0.16533104 |
| AC010623 | -5.6317177 | 2.08905064 | 0.00702143 | 0.50688854 |  | AL133520 | 1.21981269 | 0.43442345 | 0.00498675 | 0.37178963 |  | C4B-AS1 | -5.7780015 | 2.83257265 | 0.04136603 | NA |
| ATG10-IT1 | -5.1585077 | 2.34810559 | 0.02802897 | 0.99902059 |  | CSE1L-AS1 | 3.75269254 | 1.46534727 | 0.0104384 | 0.46531646 |  | AL080276 | 8.66860233 | 3.90787416 | 0.02653848 | 0.99952776 |
| LINC01411 | -5.6516578 | 2.80073474 | 0.04359963 | 0.99902059 |  | ADNP-AS1 | 6.23695594 | 2.53342107 | 0.01382144 | 0.56207172 |  | SYNJ2-IT1 | 2.67037285 | 1.15370211 | 0.02063417 | 0.99952776 |
| AC008610 | -3.7098395 | 1.73085631 | 0.03208461 | 0.99902059 |  | AL354993 | -1.2789323 | 0.49491707 | 0.00976237 | 0.46001423 |  | SOD2-OT1 | 9.41148878 | 1.37783337 | 8.45E-12 | 8.38E-09 |
| LINC01011 | -6.4867112 | 3.21731365 | 0.04378025 | 0.99902059 |  | MHENCR | -2.7246292 | 0.85002926 | 0.00134905 | 0.1597434 |  | AFDN-DT | 5.72707612 | 2.02566059 | 0.00469477 | NA |
| TFAP2A-AS1 | -1.3781778 | 0.52271833 | 0.00837516 | 0.58545874 |  | CR381653 | -1.4597197 | 0.69940321 | 0.03687971 | 0.84164927 |  | SNHG26 | 5.20064685 | 0.69754389 | 8.94E-14 | 1.33E-10 |
| AL138824 | 3.08970958 | 1.53061938 | 0.04352872 | 0.99902059 |  | IL10RB-DT | 1.81475484 | 0.62352648 | 0.00360886 | 0.27940913 |  | AC004921 | -4.9141505 | 2.50320928 | 0.0496299 | NA |
| DDX39B-AS1 | 7.29178135 | 2.24749794 | 0.00117699 | 0.19099844 |  | AP000695 | -5.7563981 | 2.76635228 | 0.03744651 | 0.84164927 |  | AC004863 | -2.0350117 | 0.99074655 | 0.0399739 | 0.99952776 |
| AL671762 | -9.715393 | 3.90730264 | 0.01290172 | 0.73691612 |  | LINC01664 | 6.72696061 | 1.82082664 | 0.00022036 | 0.05342963 |  | GS1-24F4 | -5.9363106 | 2.73078335 | 0.02971648 | NA |
| HYMAI | -1.8552064 | 0.65840717 | 0.00483661 | 0.42694099 |  | MIATNB | 3.5715685 | 1.80531898 | 0.04788826 | 0.88289525 |  | AC105233 | 6.70470513 | 3.22327313 | 0.03751708 | 0.99952776 |
| RAET1E-AS1 | -1.0298559 | 0.46642084 | 0.02724447 | 0.99827847 |  | LINC01638 | -5.6115229 | 2.83324369 | 0.04763613 | 0.88289525 |  | AC105001 | 5.79152738 | 2.77589105 | 0.0369454 | NA |
| SOD2-OT1 | -7.7880679 | 3.90881035 | 0.04632286 | 0.99902059 |  | AC002378 | 2.71892796 | 1.2383596 | 0.02812142 | 0.82589604 |  | AC091182 | -6.588437 | 1.90798289 | 0.0005542 | 0.09698565 |
| AC004691 | -5.4283241 | 2.20591172 | 0.01386247 | 0.75833583 |  | AL049747 | -6.1623817 | 1.8980251 | 0.00116738 | 0.15363631 |  | AC069120 | 6.47002762 | 2.49472139 | 0.00950081 | 0.68938816 |
| TP53TG1 | 1.46363797 | 0.6980239 | 0.03600856 | 0.99902059 |  | SGSM3-AS1 | -3.3431581 | 1.57157549 | 0.03339804 | 0.84164927 |  | OTUD6B-AS1 | 1.05025343 | 0.49017952 | 0.03214608 | 0.99952776 |
| PAXIP1-AS2 | 5.17802606 | 2.21054464 | 0.01915909 | 0.87545782 |  | OGFRP1 | -1.9757595 | 0.6826267 | 0.00379946 | 0.28861581 |  | FAM201A | -6.079587 | 2.69470651 | 0.02406298 | NA |
| LINC01006 | -5.5138822 | 2.37228138 | 0.02010968 | 0.87759538 |  | SATB1-AS1 | -5.445647 | 2.21807474 | 0.01408363 | 0.56700682 |  | AL158070 | 5.56705604 | 2.11160451 | 0.00837883 | NA |
| FAM66B | -2.7412253 | 1.33874597 | 0.04059855 | 0.99902059 |  | AC006058 | -2.0134395 | 0.91683023 | 0.02808567 | 0.82589604 |  | PAPPA-AS2 | 5.88536984 | 1.99868678 | 0.00323353 | NA |
| AC105001 | -5.0599068 | 2.4635791 | 0.03998688 | NA |  | RBM5-AS1 | 1.62174321 | 0.62466994 | 0.00942721 | 0.46001423 |  |  |  |  |  |  |
| AC022858 | 4.72592937 | 1.94895346 | 0.01531451 | 0.78265184 |  | CYB561D2 | 4.05590565 | 1.84936312 | 0.02829755 | 0.82589604 |  |  |  |  |  |  |
| AC036214 | -5.0804502 | 2.40647505 | 0.03475869 | NA |  | PTPRG-AS1 | -6.537157 | 1.78607698 | 0.00025215 | 0.05342963 |  |  |  |  |  |  |
| GASAL1 | -6.8778171 | 3.05810785 | 0.02450974 | 0.96157401 |  | AC079848 | 2.48210014 | 1.22092499 | 0.04205586 | 0.85167821 |  |  |  |  |  |  |
| PVT1 | -2.7767632 | 1.36681732 | 0.04219883 | 0.99902059 |  | AC117395 | 6.14459081 | 1.9376641 | 0.00151846 | 0.17466575 |  |  |  |  |  |  |
| AL353151 | -6.4715775 | 1.80171887 | 0.00032829 | 0.09808216 |  | AC069224 | 1.23869523 | 0.5370585 | 0.02108585 | 0.73632755 |  |  |  |  |  |  |
| AL162411 | 5.31255636 | 2.3830701 | 0.02579456 | 0.98927899 |  | AC092574 | -1.2195751 | 0.59006424 | 0.03874816 | 0.84164927 |  |  |  |  |  |  |
| FAM201A | 6.08892583 | 2.65397725 | 0.02177531 | 0.91929675 |  | AC034139 | -6.3924168 | 1.8766145 | 0.00065836 | 0.09944031 |  |  |  |  |  |  |
| BX005266 | -3.8433581 | 1.91269391 | 0.04449523 | 0.99902059 |  | AC093599 | -2.5981172 | 1.01838378 | 0.01073477 | 0.46730027 |  |  |  |  |  |  |
| AL353743 | 6.0826357 | 2.64958984 | 0.02169364 | 0.91929675 |  | AC074194 | -5.8196917 | 2.11689909 | 0.00597484 | 0.40770711 |  |  |  |  |  |  |
| AL390774 | -3.952071 | 1.78107591 | 0.02649194 | 0.9893719 |  | SLC9A3-AS1 | -8.1625328 | 3.90845024 | 0.03675888 | 0.84164927 |  |  |  |  |  |  |
| LINC01451 | -5.2795561 | 2.26272635 | 0.01963387 | 0.87601116 |  | CTD-2297D10 | -2.1289521 | 1.00168156 | 0.03355508 | 0.84164927 |  |  |  |  |  |  |
|  |  |  |  |  |  | AC122710 | 5.66851893 | 2.13938374 | 0.00805863 | 0.43599693 |  |  |  |  |  |  |
|  |  |  |  |  |  | CKMT2-AS1 | -2.6997697 | 1.37035704 | 0.04882447 | 0.88289525 |  |  |  |  |  |  |
|  |  |  |  |  |  | RGMB-AS1 | -1.0464864 | 0.38705684 | 0.00685717 | 0.43599693 |  |  |  |  |  |  |
|  |  |  |  |  |  | AC106786 | -4.0897626 | 1.54608601 | 0.00816339 | 0.43599693 |  |  |  |  |  |  |
|  |  |  |  |  |  | AC008663 | -5.7592753 | 2.72940886 | 0.03485133 | 0.84164927 |  |  |  |  |  |  |
|  |  |  |  |  |  | AC140125 | 5.57202908 | 2.16037462 | 0.00990306 | 0.46001423 |  |  |  |  |  |  |
|  |  |  |  |  |  | LINC01011 | -6.5874087 | 3.12299917 | 0.03491686 | 0.84164927 |  |  |  |  |  |  |
|  |  |  |  |  |  | AL590004 | -1.217687 | 0.46195546 | 0.00839045 | 0.43599693 |  |  |  |  |  |  |
|  |  |  |  |  |  | LINC00240 | -5.938544 | 1.98566697 | 0.00278334 | 0.25187443 |  |  |  |  |  |  |
|  |  |  |  |  |  | LINC01012 | 1.42927653 | 0.64612571 | 0.0269617 | 0.82233177 |  |  |  |  |  |  |
|  |  |  |  |  |  | HCG27 | 5.7071295 | 2.76614536 | 0.039093 | 0.84164927 |  |  |  |  |  |  |
|  |  |  |  |  |  | AL671762 | -9.8162001 | 3.90730049 | 0.01199567 | 0.50836397 |  |  |  |  |  |  |
|  |  |  |  |  |  | PSMB8-AS1 | -2.7342397 | 0.91802927 | 0.00289777 | 0.25187443 |  |  |  |  |  |  |
|  |  |  |  |  |  | AL031320 | -3.9508418 | 1.80385095 | 0.02850783 | 0.82589604 |  |  |  |  |  |  |
|  |  |  |  |  |  | HYMAI | -1.796438 | 0.68235619 | 0.00847096 | 0.43599693 |  |  |  |  |  |  |
|  |  |  |  |  |  | LINC01615 | 4.59564599 | 1.74260871 | 0.00835881 | 0.43599693 |  |  |  |  |  |  |
|  |  |  |  |  |  | SNHG26 | 5.14651068 | 0.68008009 | 3.80E-14 | 1.53E-10 |  |  |  |  |  |  |
|  |  |  |  |  |  | AC005162 | 5.59750776 | 2.823552 | 0.0474306 | 0.88289525 |  |  |  |  |  |  |
|  |  |  |  |  |  | AC073210 | -5.744893 | 2.76626527 | 0.03782292 | 0.84164927 |  |  |  |  |  |  |
|  |  |  |  |  |  | DLX6-AS1 | -2.507518 | 1.20098679 | 0.03680854 | 0.84164927 |  |  |  |  |  |  |
|  |  |  |  |  |  | AC002467 | 2.58852244 | 1.18791565 | 0.02932828 | 0.83151862 |  |  |  |  |  |  |
|  |  |  |  |  |  | ATP6V0E2-AS1 | -5.3670962 | 1.2650482 | 2.21E-05 | 0.00808651 |  |  |  |  |  |  |
|  |  |  |  |  |  | PAXIP1-AS2 | 4.57276695 | 1.82412409 | 0.01218197 | 0.51088124 |  |  |  |  |  |  |
|  |  |  |  |  |  | LINC01006 | -5.6046848 | 2.35273851 | 0.01720972 | 0.65811817 |  |  |  |  |  |  |
|  |  |  |  |  |  | GS1-24F4 | -6.357983 | 2.47118523 | 0.01008656 | 0.46146016 |  |  |  |  |  |  |
|  |  |  |  |  |  | AC022858 | 4.28200279 | 2.18288119 | 0.04980571 | 0.88724679 |  |  |  |  |  |  |
|  |  |  |  |  |  | AC036214 | -5.1742596 | 2.39452567 | 0.03070535 | 0.84118459 |  |  |  |  |  |  |
|  |  |  |  |  |  | AC087752 | -4.2529275 | 2.08657506 | 0.04152657 | 0.85167821 |  |  |  |  |  |  |
|  |  |  |  |  |  | RNF139-AS1 | 1.00535 | 0.47945027 | 0.03600414 | 0.84164927 |  |  |  |  |  |  |
|  |  |  |  |  |  | PVT1 | -3.0327793 | 1.35537589 | 0.02524762 | 0.80036952 |  |  |  |  |  |  |
|  |  |  |  |  |  | AC103706 | -1.0229827 | 0.38081436 | 0.00722476 | 0.43599693 |  |  |  |  |  |  |
|  |  |  |  |  |  | CDC37L1-DT | -5.6025257 | 2.84474229 | 0.04890354 | 0.88289525 |  |  |  |  |  |  |
|  |  |  |  |  |  | AL353151 | -6.5634493 | 1.79167286 | 0.00024898 | 0.05342963 |  |  |  |  |  |  |
|  |  |  |  |  |  | CDKN2B-AS1 | -6.0835049 | 2.84417862 | 0.03244117 | 0.84164927 |  |  |  |  |  |  |
|  |  |  |  |  |  | IFT74-AS1 | 5.61538787 | 2.18812703 | 0.01027902 | 0.4649814 |  |  |  |  |  |  |
|  |  |  |  |  |  | STRA6LP | -4.3297493 | 1.180116 | 0.00024358 | 0.05342963 |  |  |  |  |  |  |
|  |  |  |  |  |  | GPRACR | 3.49567819 | 1.64106148 | 0.03316069 | 0.84164927 |  |  |  |  |  |  |

**Identification of DEMs：**

| 2Gy vs 0Gy | | | | |  | 4Gy vs 0Gy | | | | |  | 4Gy vs 2Gy | | | | |
| --- | --- | --- | --- | --- | --- | --- | --- | --- | --- | --- | --- | --- | --- | --- | --- | --- |
| miRNAs | logFC | lfcSE | pvalue | padj |  | miRNAs | logFC | lfcSE | pvalue | padj |  | miRNAs | logFC | lfcSE | pvalue | padj |
| hsa-miR-20b-3p_R-2 | -3.3850397 | 1.2839797 | 0.00837994 | 0.13714477 |  | hsa-miR-145-5p | -4.2343481 | 2.05532485 | 0.03938092 | NA |  | hsa-miR-23b-5p_L-1 | -1.2273645 | 0.61910683 | 0.04742597 | 0.99957636 |
| hsa-miR-26b-3p | -5.4177196 | 1.85284002 | 0.00345556 | 0.08153035 |  | hsa-miR-320e_L+1R-1_1ss18GA | -4.3039535 | 2.00260759 | 0.03162056 | NA |  | hsa-miR-34c-3p | -5.068894 | 1.83447352 | 0.00572495 | 0.51651734 |
| hsa-miR-146a-5p | -1.692609 | 0.77106118 | 0.02815153 | 0.28029137 |  | hsa-miR-365a-5p | -1.8657395 | 0.54594924 | 0.00063217 | 0.01023692 |  | hsa-miR-205-5p_R-1 | 2.07999551 | 1.00758685 | 0.03898609 | 0.99957636 |
| hsa-miR-197-5p | -5.3093353 | 1.82546491 | 0.00363186 | 0.08153035 |  | hsa-miR-548w_R-1 | -4.2421532 | 2.07990094 | 0.04139079 | NA |  | hsa-miR-223-3p_R+1 | 5.42116796 | 2.57115711 | 0.03499169 | 0.99957636 |
| hsa-miR-205-5p_R-1 | -3.014689 | 0.8432011 | 0.00034984 | 0.02625385 |  | hsa-miR-551a | -4.6585123 | 1.86785274 | 0.01262959 | NA |  | hsa-miR-539-5p_R+1 | -5.142448 | 2.54705801 | 0.04348975 | 0.99957636 |
| hsa-miR-320e_L+1R-1_1ss18GA | -4.6315258 | 2.07526097 | 0.02562951 | NA |  | hsa-miR-942-5p_L-2R+3 | -5.2654052 | 1.74976243 | 0.00261927 | NA |  | hsa-mir-663a-p3 | -3.27129 | 1.51714957 | 0.03106743 | 0.99957636 |
| hsa-miR-548w_R-1 | -4.5689646 | 2.14111888 | 0.03284978 | NA |  | hsa-miR-1246_R+1 | 1.19863893 | 0.3367998 | 0.0003724 | 0.00771618 |  | hsa-mir-663b-p3 | -3.27129 | 1.51714957 | 0.03106743 | 0.99957636 |
| hsa-miR-585-5p | -4.6789447 | 2.06821384 | 0.02367814 | NA |  | hsa-miR-1247-3p_L-3 | -1.6318764 | 0.46639313 | 0.00046713 | 0.008962 |  | hsa-miR-942-3p | -5.2284053 | 1.79776201 | 0.00363416 | 0.44359878 |
| hsa-miR-629-3p | -5.8273023 | 1.65057327 | 0.00041482 | 0.02625385 |  | hsa-miR-1292-5p_R-3 | -4.2901922 | 1.99926372 | 0.03188207 | NA |  | hsa-miR-6720-3p | -4.4899641 | 2.08236746 | 0.03106942 | 0.99957636 |
| hsa-miR-641_R-1 | -2.0062877 | 0.95520847 | 0.03569663 | 0.31440496 |  | hsa-miR-2110_R+1 | -1.0588064 | 0.44328211 | 0.0169145 | 0.11528565 |  | hsa-miR-9903_1ss3AG | 5.30758363 | 2.58162264 | 0.0397912 | 0.99957636 |
| hsa-miR-1226-3p | -4.6217262 | 2.08662 | 0.02676457 | NA |  | hsa-miR-2116-3p_L+1R-1 | -2.7613142 | 1.34859059 | 0.04060357 | NA |  | hsa-miR-10399-3p_L+1_1ss22CT | 1.06104471 | 0.53828678 | 0.04870657 | 0.99957636 |
| hsa-miR-1247-3p_L-3 | -1.4892664 | 0.48175623 | 0.00199264 | 0.06222458 |  | hsa-miR-4636 | -5.6321111 | 1.55360615 | 0.00028875 | NA |  | hsa-miR-12136_R+8 | 1.05148022 | 0.19627591 | 8.45E-08 | 6.86E-05 |
| hsa-miR-2116-3p_L+1R-1 | -6.1722809 | 1.56849934 | 8.31E-05 | 0.01274382 |  | hsa-miR-5010-3p_R+1 | -4.3766621 | 2.02597522 | 0.03075144 | NA |  | eca-mir-703-p5 | 5.61217376 | 2.53351395 | 0.02674814 | 0.99957636 |
| hsa-mir-3648-2-p3 | 1.27412451 | 0.4457701 | 0.00425978 | 0.08868092 |  | hsa-miR-6511b-3p_L-2R+2 | -4.5097091 | 2.01957514 | 0.02554902 | NA |  | efu-mir-9298-p5_1ss18CT | -1.7231675 | 0.81433273 | 0.03434068 | 0.99957636 |
| hsa-miR-3934-5p_R+1 | -3.0772115 | 1.39683224 | 0.02759525 | 0.27879319 |  | hsa-mir-7108-p3_1ss3GT | 1.30233664 | 0.32314943 | 5.57E-05 | 0.00192503 |  | PC-5p-68315_18 | -5.3287754 | 1.86967454 | 0.00437043 | 0.44359878 |
| hsa-mir-7108-p3_1ss3GT | 1.11856621 | 0.30401263 | 0.00023384 | 0.02294945 |  | hsa-mir-7110-p3_1ss18AC | 1.50043306 | 0.23640037 | 2.20E-10 | 1.14E-07 |  |  |  |  |  |  |
| hsa-mir-7110-p3_1ss18AC | 1.1011175 | 0.16401982 | 1.90E-11 | 1.31E-08 |  | hsa-miR-7704_1ss19GC | 1.05353871 | 0.36076102 | 0.00349669 | 0.03706702 |  |  |  |  |  |  |
| hsa-mir-9902-1-p3_1ss13GC | 1.56450265 | 0.56985537 | 0.00604302 | 0.10925138 |  | hsa-mir-9902-1-p3_1ss13GC | 2.05098423 | 0.50795604 | 5.40E-05 | 0.00192503 |  |  |  |  |  |  |
| hsa-miR-9903_1ss3AG | -5.0023799 | 2.04172779 | 0.01428277 | NA |  | hsa-miR-10400-5p_R-3_1ss12GA | 1.1827279 | 0.34294753 | 0.00056326 | 0.01023692 |  |  |  |  |  |  |
| cgr-miR-1285_L-2R+2 | 1.58017303 | 0.68498706 | 0.02106232 | 0.22967956 |  | ssc-miR-1285_L+1_1ss5GA | 1.0621837 | 0.26521398 | 6.20E-05 | 0.00200776 |  |  |  |  |  |  |
| mmu-mir-1983-p3_1ss15AT | 1.03880203 | 0.25221109 | 3.81E-05 | 0.00900314 |  | mmu-mir-1983-p3_1ss15AT | 1.20859719 | 0.2430492 | 6.60E-07 | 6.84E-05 |  |  |  |  |  |  |
| bta-miR-342_R-3 | -5.9759583 | 1.72506337 | 0.00053182 | 0.02625385 |  | bta-miR-342_R-3 | -5.6411768 | 1.72027482 | 0.00104091 | NA |  |  |  |  |  |  |
| mmu-mir-682-p5 | 1.36014951 | 0.48523297 | 0.00506162 | 0.0988779 |  | mmu-mir-682-p5 | 1.33187856 | 0.53733918 | 0.01318787 | 0.09721119 |  |  |  |  |  |  |
| dno-miR-708-3p_R-1 | 6.84509546 | 3.02743388 | 0.02375788 | 0.25110249 |  | mmu-mir-6240-p5_1 | 1.23456798 | 0.42287489 | 0.00350634 | 0.03706702 |  |  |  |  |  |  |
| mmu-mir-6240-p5_1 | 1.1016329 | 0.42275315 | 0.00916456 | 0.13714477 |  | eca-mir-8969-p3_1ss14GT | 1.64294731 | 0.45359994 | 0.00029231 | 0.00658341 |  |  |  |  |  |  |
| eca-mir-8969-p3_1ss14GT | 1.67237098 | 0.51063967 | 0.00105643 | 0.04269216 |  | bta-mir-2887-2-p3_1ss11AT | 1.24243625 | 0.33715899 | 0.00022869 | 0.00564098 |  |  |  |  |  |  |
| mmu-miR-3535 | -1.0718987 | 0.30891034 | 0.00052059 | 0.02625385 |  | bta-mir-2887-2-p3_1ss13AT | 1.6079653 | 0.33974001 | 2.21E-06 | 0.00016376 |  |  |  |  |  |  |
| mmu-mir-6236-p3 | 1.69042533 | 0.83528495 | 0.04299374 | 0.3692087 |  | mmu-mir-6240-p5_2 | 1.23456798 | 0.42287489 | 0.00350634 | 0.03706702 |  |  |  |  |  |  |
| mmu-mir-6240-p5_2 | 1.1016329 | 0.42275315 | 0.00916456 | 0.13714477 |  | efu-mir-9298-p5_1ss18CT | -2.2004067 | 0.78368985 | 0.00498886 | 0.04875909 |  |  |  |  |  |  |
| mmu-mir-6240-p5_1ss19GT | 1.04409619 | 0.40077877 | 0.00918291 | 0.13714477 |  | mdo-miR-26-5p_R+3 | -4.9244787 | 1.83700452 | 0.00734659 | NA |  |  |  |  |  |  |
| bta-miR-11987_L-2R-1_1ss8TA | 1.11514794 | 0.3287147 | 0.00069271 | 0.03172601 |  | PC-5p-21488_180 | 2.02649991 | 0.5911654 | 0.0006081 | 0.01023692 |  |  |  |  |  |  |
| PC-5p-33093_92 | 1.40270048 | 0.6639677 | 0.03463472 | 0.30979798 |  | PC-3p-20639_191 | 1.33291017 | 0.55087207 | 0.01553603 | 0.10730217 |  |  |  |  |  |  |
| PC-3p-58192_28 | 5.99701837 | 1.87837619 | 0.00140968 | 0.05097118 |  | PC-5p-10807_470 | 1.9167078 | 0.34622593 | 3.09E-08 | 5.34E-06 |  |  |  |  |  |  |
| PC-5p-10807_470 | 1.4467112 | 0.38876644 | 0.00019821 | 0.02269512 |  | PC-5p-25509_139 | 1.45425064 | 0.54191367 | 0.00728458 | 0.06351157 |  |  |  |  |  |  |
| PC-5p-45659_50 | -2.4401652 | 1.10261432 | 0.02689266 | 0.27879319 |  | PC-5p-66569_20 | 5.58604711 | 2.80785488 | 0.04665312 | NA |  |  |  |  |  |  |
| PC-3p-72339_16 | -4.634848 | 2.12097426 | 0.0288709 | NA |  | PC-5p-45659_50 | -2.2478302 | 1.07764926 | 0.03699091 | NA |  |  |  |  |  |  |
| PC-5p-24916_144 | 1.30627495 | 0.60620656 | 0.03117477 | 0.2968375 |  | PC-5p-23411_158 | 1.14975808 | 0.546701 | 0.03545843 | 0.19542049 |  |  |  |  |  |  |
| PC-3p-42589_58 | 5.86903521 | 1.86055136 | 0.00160795 | 0.05260304 |  | PC-3p-72339_16 | -4.3081797 | 2.06527761 | 0.03697816 | NA |  |  |  |  |  |  |
| PC-5p-67719_19 | 5.9895488 | 2.5495581 | 0.01881128 | 0.20990232 |  | PC-3p-19589_206 | 1.01338028 | 0.44326659 | 0.02224465 | 0.1458573 |  |  |  |  |  |  |
|  |  |  |  |  |  | PC-5p-24916_144 | 1.27036166 | 0.58081199 | 0.02872671 | 0.16909588 |  |  |  |  |  |  |
|  |  |  |  |  |  | PC-3p-42589_58 | 7.00684841 | 1.50929196 | 3.44E-06 | NA |  |  |  |  |  |  |
|  |  |  |  |  |  | PC-5p-21899_175 | 1.56953867 | 0.53426819 | 0.00330619 | 0.03706702 |  |  |  |  |  |  |
|  |  |  |  |  |  | PC-5p-29658_109 | 1.39272364 | 0.66385743 | 0.0359117 | 0.19542049 |  |  |  |  |  |  |
|  |  |  |  |  |  | PC-3p-39763_66 | 1.66447562 | 0.81498809 | 0.04111869 | NA |  |  |  |  |  |  |
|  |  |  |  |  |  | PC-3p-6551_897 | 1.36701131 | 0.2806246 | 1.11E-06 | 9.57E-05 |  |  |  |  |  |  |
|  |  |  |  |  |  | PC-5p-8684_627 | 1.18575456 | 0.27400028 | 1.51E-05 | 0.00077922 |  |  |  |  |  |  |
|  |  |  |  |  |  | PC-5p-10659_479 | 1.06214831 | 0.31081275 | 0.0006324 | 0.01023692 |  |  |  |  |  |  |
|  |  |  |  |  |  | PC-5p-6367_932 | 1.31030972 | 0.36964363 | 0.00039292 | 0.00782824 |  |  |  |  |  |  |

**Identification of DEGs：**

| 2Gy vs 0Gy | | | | |  | 4Gy vs 0Gy | | | | |  | 4Gy vs 2Gy | | | | |
| --- | --- | --- | --- | --- | --- | --- | --- | --- | --- | --- | --- | --- | --- | --- | --- | --- |
| mRNAs | logFC | lfcSE | pvalue | padj |  | mRNAs | logFC | lfcSE | pvalue | padj |  | mRNAs | logFC | lfcSE | pvalue | padj |
| CFH | -1.026072891 | 0.47738862 | 0.031607054 | 0.25351159 |  | CFH | -1.470071058 | 0.379891954 | 0.000108966 | 0.00267105 |  | CD38 | 2.192762789 | 1.084781157 | 0.043239694 | 0.997255808 |
| THSD7A | -1.818117705 | 0.492083164 | 0.000220115 | 0.008877137 |  | THSD7A | -1.92544367 | 0.372143736 | 2.29E-07 | 1.42E-05 |  | CD22 | 3.778190587 | 1.761415975 | 0.031954966 | NA |
| ABCC8 | 1.130342341 | 0.461003319 | 0.014209704 | 0.159435992 |  | CD6 | 1.212225079 | 0.317417739 | 0.000133982 | 0.003165633 |  | BEST2 | 2.076104355 | 1.0427815 | 0.046488649 | NA |
| PROM1 | -1.274700599 | 0.460291415 | 0.005617104 | 0.087129019 |  | CASR | -6.229764448 | 2.255718708 | 0.005748988 | 0.058460913 |  | TG | -1.776335847 | 0.606586817 | 0.003406987 | 0.383413105 |
| CD6 | 1.158930855 | 0.340530004 | 0.000665735 | 0.019920191 |  | C2orf83 | -1.643818623 | 0.737239019 | 0.025767656 | 0.165301293 |  | GUCY1B1 | 1.755325292 | 0.746831465 | 0.018755094 | 0.820675558 |
| MARCO | -2.581997287 | 1.0794177 | 0.016755567 | 0.175743191 |  | TG | -2.331126931 | 0.511778331 | 5.24E-06 | 0.000211781 |  | ATP2B3 | 6.002159444 | 2.280227148 | 0.008481797 | NA |
| CASR | -6.044751298 | 2.243701836 | 0.007057953 | 0.101223717 |  | ADAM28 | 5.735134415 | 2.385889914 | 0.016226908 | 0.12295365 |  | TP63 | 3.723633567 | 1.379064678 | 0.006931546 | NA |
| VCAN | -1.080874481 | 0.454545426 | 0.017410414 | 0.180179107 |  | SERPINB3 | -2.463929213 | 1.110541102 | 0.026508878 | 0.168404522 |  | WSCD2 | 3.251897802 | 1.554725057 | 0.036472304 | NA |
| SERPINB3 | -2.466513319 | 0.81400649 | 0.002444805 | 0.05036298 |  | TMCC3 | -1.084841847 | 0.395176098 | 0.006047197 | 0.060467766 |  | ITM2A | 6.069818031 | 1.790331438 | 0.00069808 | NA |
| GNA15 | 2.856340907 | 1.09091883 | 0.008837189 | 0.117150037 |  | GNA15 | 3.26603972 | 1.008482296 | 0.001201309 | 0.018157175 |  | LAG3 | -1.501769253 | 0.659558545 | 0.02279035 | 0.88141066 |
| DLX3 | 1.113456998 | 0.388215948 | 0.004128951 | 0.071681203 |  | SNCAIP | -1.817128736 | 0.324806656 | 2.21E-08 | 1.88E-06 |  | SRPX2 | 1.044716652 | 0.422912462 | 0.013500336 | 0.760881748 |
| SNCAIP | -1.881814188 | 0.374726206 | 5.12E-07 | 6.78E-05 |  | RHOBTB1 | -1.250175759 | 0.225174958 | 2.82E-08 | 2.30E-06 |  | NKG7 | -4.072461668 | 1.478819014 | 0.005889682 | NA |
| TP63 | -4.205255522 | 1.280823967 | 0.001026204 | 0.027616845 |  | WSCD2 | -2.313660296 | 0.566706422 | 4.45E-05 | 0.001291711 |  | SLC1A2 | 5.859896508 | 1.853379998 | 0.001568322 | NA |
| TBX21 | 3.905944435 | 1.146952734 | 0.000660437 | 0.019864437 |  | COBLL1 | -1.162825076 | 0.355244092 | 0.001062947 | 0.016410675 |  | ST8SIA4 | -1.022744903 | 0.297964518 | 0.000598179 | 0.15837679 |
| WSCD2 | -5.522679736 | 0.988676006 | 2.32E-08 | 5.04E-06 |  | KCNK2 | -1.339378627 | 0.296557767 | 6.29E-06 | 0.000251386 |  | KYNU | 6.006487794 | 2.267692802 | 0.008079677 | NA |
| KCNQ2 | -5.962027722 | 1.857965785 | 0.001332435 | 0.033118874 |  | SERTAD4 | -1.29644127 | 0.546057346 | 0.017587726 | 0.13105634 |  | MUC5B | -1.499311775 | 0.725316667 | 0.038723473 | 0.997255808 |
| PPEF1 | -2.574507272 | 1.195661507 | 0.031302378 | 0.252198168 |  | SH2D3C | 1.479287789 | 0.626261318 | 0.018172058 | 0.133543283 |  | RERG | -2.180321863 | 0.707452635 | 0.002056609 | 0.312026848 |
| PTHLH | -1.321739145 | 0.525147044 | 0.011839463 | 0.140324107 |  | MLC1 | 5.887279102 | 1.82328054 | 0.001242462 | 0.018622699 |  | TBR1 | -6.022967044 | 1.846004121 | 0.001103543 | NA |
| TBL1Y | -1.011587524 | 0.389232168 | 0.009351458 | 0.121713482 |  | ASB2 | 1.79297047 | 0.627274883 | 0.004258519 | 0.046954656 |  | CASP1 | 1.194768614 | 0.396328621 | 0.002573262 | 0.350977308 |
| SH2D3C | 1.435044474 | 0.672582532 | 0.032872812 | 0.259699419 |  | NFATC2 | 1.189697787 | 0.379016401 | 0.001695784 | 0.023417119 |  | ZNF385B | 3.585095148 | 0.9473094 | 0.000154016 | 0.079951618 |
| ASB2 | 1.353935826 | 0.676739712 | 0.045427489 | 0.308729235 |  | DOK5 | -1.021561935 | 0.518603778 | 0.048857712 | 0.252066556 |  | SLC25A48 | 1.532389461 | 0.709413266 | 0.030766471 | 0.982085108 |
| DOK5 | -1.508245547 | 0.684412364 | 0.02754483 | 0.233763682 |  | KLHL4 | -3.219493788 | 1.316172766 | 0.014440985 | 0.113361338 |  | ZNF300 | 1.242006796 | 0.528543703 | 0.018780178 | 0.820675558 |
| CHRNA4 | 1.705797929 | 0.651229602 | 0.008809764 | 0.117111781 |  | TNFSF13B | -2.2858105 | 0.860503942 | 0.007898863 | 0.074922042 |  | RADX | 1.169335533 | 0.517970627 | 0.02397482 | 0.892899694 |
| TNFSF13B | -1.383078673 | 0.603582408 | 0.021937423 | 0.205279795 |  | RASL12 | 1.404475398 | 0.484284212 | 0.003730369 | 0.043013622 |  | NPFFR1 | 5.813606687 | 1.869004218 | 0.001867475 | NA |
| RASL12 | 1.422213816 | 0.534052302 | 0.007743339 | 0.107216044 |  | IGDCC4 | 1.027308189 | 0.233133254 | 1.05E-05 | 0.000379757 |  | ZNF214 | 1.516373922 | 0.513281276 | 0.003134048 | 0.36924981 |
| IGDCC4 | 1.147366331 | 0.258170808 | 8.82E-06 | 0.000671785 |  | NOVA2 | 1.177023833 | 0.248159054 | 2.11E-06 | 9.80E-05 |  | CDH22 | -1.341543155 | 0.567413311 | 0.018063502 | 0.812586619 |
| NOVA2 | 1.230003963 | 0.266336478 | 3.87E-06 | 0.000350695 |  | CAV1 | 2.154055823 | 0.969487495 | 0.026293442 | 0.167627975 |  | ASTN1 | 1.053742954 | 0.406462708 | 0.00952891 | 0.674578365 |
| EBI3 | 1.735801059 | 0.543078881 | 0.001392396 | 0.033902945 |  | LHX3 | 2.897385806 | 1.116931707 | 0.009485044 | 0.085324403 |  | GBP5 | 3.252135736 | 1.623484313 | 0.045157679 | NA |
| SHD | 1.894518625 | 0.707692272 | 0.007427636 | 0.104573398 |  | TLX1 | 1.832193712 | 0.392619369 | 3.06E-06 | 0.000137702 |  | SLC34A2 | -1.848176409 | 0.87173973 | 0.033997515 | 0.997255808 |
| LHX3 | 3.038228441 | 1.196490395 | 0.011107974 | 0.13635837 |  | NEURL1 | 1.287229994 | 0.356715952 | 0.000307904 | 0.006188574 |  | GOLGA6A | 3.206721506 | 1.438042023 | 0.025752623 | NA |
| TLX1 | 1.380779885 | 0.507916768 | 0.006557547 | 0.0963622 |  | CRYAB | 5.758481716 | 1.876966245 | 0.002155161 | 0.0280132 |  | HS3ST6 | -1.358235984 | 0.604236847 | 0.024585525 | 0.903218885 |
| NEURL1 | 1.213747349 | 0.475650087 | 0.010717872 | 0.133546675 |  | SLC1A2 | 5.935549499 | 1.827962242 | 0.001165934 | 0.017734275 |  | ZG16B | -3.387892915 | 1.523610976 | 0.026175742 | NA |
| APOA5 | 6.00329391 | 1.859457362 | 0.001244329 | 0.032332224 |  | NR2E1 | 5.855003041 | 1.912011516 | 0.002197007 | 0.028454307 |  | PIGR | -3.208093285 | 1.037881219 | 0.001994821 | 0.309392213 |
| TRPV4 | 1.262873804 | 0.275715295 | 4.64E-06 | 0.000399828 |  | C6orf118 | -3.937414127 | 1.582454387 | 0.012840266 | 0.10444239 |  | DUSP19 | 1.016189696 | 0.40473148 | 0.012046644 | 0.742822648 |
| C6orf118 | -6.189872917 | 1.837968621 | 0.000757762 | 0.022050564 |  | GHR | -1.256938734 | 0.486631848 | 0.00979636 | 0.087031583 |  | ELOVL7 | 1.079217272 | 0.349508252 | 0.002016331 | 0.309392213 |
| CDH6 | -1.782617914 | 0.313147865 | 1.25E-08 | 3.24E-06 |  | HAND1 | -7.21422203 | 1.556602488 | 3.58E-06 | 0.000155469 |  | SP8 | 3.666471946 | 1.406881261 | 0.009157997 | NA |
| CNTN3 | -1.47542384 | 0.479713571 | 0.002100548 | 0.045428322 |  | CDH6 | -2.339346683 | 0.315684243 | 1.26E-13 | 2.83E-11 |  | COL1A2 | -3.181821684 | 1.04441512 | 0.002315144 | 0.328286724 |
| OTOF | 3.057616328 | 1.250400425 | 0.014472779 | 0.160999827 |  | ST8SIA4 | -1.683743733 | 0.300181448 | 2.03E-08 | 1.74E-06 |  | KCNV1 | 5.713518833 | 2.456463442 | 0.020023223 | NA |
| PLCL1 | -2.931078486 | 1.190595273 | 0.013821873 | 0.156804882 |  | FGF12 | -1.421177141 | 0.392875983 | 0.000297614 | 0.006031497 |  | PGM2L1 | 1.169000594 | 0.338387642 | 0.00055107 | 0.151859053 |
| NR5A2 | -1.582670839 | 0.673071767 | 0.018702178 | 0.188410198 |  | CCL20 | -1.296827673 | 0.623332084 | 0.037481861 | 0.212234964 |  | MUCL3 | 2.641508115 | 0.917826783 | 0.004002015 | 0.424347795 |
| TNFSF4 | -5.812714863 | 1.934331223 | 0.002655585 | 0.053323996 |  | POMC | 4.075475563 | 1.305384242 | 0.001795961 | 0.024287673 |  | FAM110B | -1.520822711 | 0.693405298 | 0.028288173 | 0.943148657 |
| MUC5B | 1.792154289 | 0.762506527 | 0.018755959 | 0.188706299 |  | OTOF | 2.809718008 | 1.331704581 | 0.034869913 | 0.201859698 |  | CXCL10 | 3.866294304 | 1.335393935 | 0.003788612 | NA |
| MYB | -1.317255646 | 0.64578263 | 0.041372065 | 0.291773127 |  | PLCL1 | -2.886741359 | 0.964826507 | 0.002771747 | 0.033885014 |  | ADRA1B | -1.355675485 | 0.55427962 | 0.014451785 | 0.765905504 |
| SLC16A7 | -1.217261165 | 0.299868652 | 4.92E-05 | 0.002774172 |  | NT5C1A | 3.310888188 | 1.51769405 | 0.029144575 | 0.179515577 |  | NAT1 | 1.072288417 | 0.488565327 | 0.028180116 | 0.942145911 |
| GJA3 | 1.119334367 | 0.368361903 | 0.002376162 | 0.049257722 |  | ST6GALNAC5 | -1.232111974 | 0.273979628 | 6.89E-06 | 0.000271573 |  | FADS6 | 1.693208613 | 0.784459866 | 0.030893732 | 0.982085108 |
| LY9 | -2.254944277 | 1.057725859 | 0.033016738 | 0.260441125 |  | CNR1 | -1.811280616 | 0.59386517 | 0.002288518 | 0.029270657 |  | ACSM6 | -3.298037239 | 1.515426279 | 0.029532095 | NA |
| SFTPA1 | 8.450290618 | 3.908225215 | 0.030604221 | 0.248890937 |  | SLC16A7 | -1.449174989 | 0.277943658 | 1.85E-07 | 1.19E-05 |  | MAB21L3 | -2.394408837 | 1.1132702 | 0.03149289 | NA |
| C4BPA | -1.530395322 | 0.685229879 | 0.025522298 | 0.223815536 |  | TRPM6 | -2.569048597 | 1.018272437 | 0.011637555 | 0.097640102 |  | SLC26A9 | -1.091690755 | 0.289172895 | 0.000159868 | 0.079951618 |
| IL17C | 6.477108564 | 1.776798528 | 0.000266995 | 0.010359276 |  | VSX2 | 5.762398354 | 1.879562538 | 0.002170748 | 0.028139537 |  | UTS2R | 2.301062856 | 1.100991148 | 0.036618505 | NA |
| PCSK2 | -1.409866777 | 0.488942749 | 0.003932817 | 0.069599685 |  | GJA3 | 1.324337386 | 0.383394172 | 0.000551836 | 0.009980293 |  | TNFSF15 | -1.779802185 | 0.873946948 | 0.041699114 | NA |
| FGD3 | 2.043910684 | 0.577388729 | 0.000400246 | 0.013611227 |  | CSMD2 | -1.002521545 | 0.310599217 | 0.001247891 | 0.018684608 |  | IFNL1 | 1.165030969 | 0.57843209 | 0.043997058 | 0.997255808 |
| ALDH1A2 | -1.418643067 | 0.429142919 | 0.000947195 | 0.026296313 |  | PTGFR | -1.175014212 | 0.291015376 | 5.40E-05 | 0.001499803 |  | GLDN | -1.121802021 | 0.426917008 | 0.008596891 | 0.648512953 |
| ATP1B2 | 1.989044921 | 0.512486102 | 0.000103956 | 0.005011229 |  | NPY | -1.312040624 | 0.535195613 | 0.014225585 | 0.112564639 |  | CCDC9B | 1.534715077 | 0.460066875 | 0.000850384 | 0.200135111 |
| EDA2R | 1.231199193 | 0.384048121 | 0.00134666 | 0.033370375 |  | TNFAIP6 | -1.584133391 | 0.619057181 | 0.01049903 | 0.091336479 |  | ZAR1L | 5.713956205 | 2.459035058 | 0.020143837 | NA |
| AOC3 | -1.197643093 | 0.574261876 | 0.037020788 | 0.27526491 |  | C4BPA | -3.728059414 | 1.129103121 | 0.000960706 | 0.015241008 |  | LCE1B | -2.0299851 | 0.936461852 | 0.030180158 | NA |
| RHBG | 2.23326409 | 1.050699187 | 0.033544679 | 0.26277355 |  | KIF25 | -1.242406416 | 0.461359954 | 0.007082882 | 0.06886188 |  | TMEM239 | -3.790376009 | 1.39309445 | 0.006511784 | NA |
| CHRM3 | -1.018298574 | 0.505122126 | 0.043805696 | 0.301812395 |  | HS3ST3B1 | -1.175803714 | 0.280977626 | 2.86E-05 | 0.00088745 |  | CDSN | -2.743914605 | 0.815390724 | 0.000765012 | 0.19129551 |
| VAV3 | -6.597454694 | 1.708989178 | 0.000113182 | 0.005290519 |  | PCSK2 | -2.056352752 | 0.646762738 | 0.001475525 | 0.021125699 |  | SP9 | -1.213238645 | 0.542117403 | 0.025223473 | 0.913116785 |
| ADAMTS8 | -1.198265886 | 0.42049415 | 0.004376581 | 0.074505965 |  | FGD3 | 1.338063276 | 0.629377572 | 0.033502392 | 0.19676888 |  | PRSS56 | 6.536583575 | 2.110891982 | 0.001957552 | NA |
| EHF | -1.064700125 | 0.350400255 | 0.00237739 | 0.049257722 |  | ALDH1A2 | -1.663393161 | 0.452532279 | 0.000237157 | 0.005085611 |  | PCDHA12 | 1.956743743 | 0.764305764 | 0.01046245 | 0.702857991 |
| FAIM2 | 2.092878242 | 0.484328634 | 1.55E-05 | 0.001110905 |  | ATP1B2 | 1.80976935 | 0.469295912 | 0.000115093 | 0.002792694 |  | PRR33 | 3.165552786 | 1.581071413 | 0.045267877 | NA |
| EGR4 | 4.772780716 | 1.151561616 | 3.40E-05 | 0.0021374 |  | KLHDC7B | -1.235822231 | 0.630364533 | 0.049938756 | 0.255130409 |  | SFTA3;NKX2-1 | -3.804945071 | 1.864616015 | 0.041290088 | NA |
| AOAH | -3.336206756 | 1.450026459 | 0.021403489 | 0.201964215 |  | EDA2R | 1.006782797 | 0.365508541 | 0.005878704 | 0.059360472 |  | AHNAK2 | -1.770891106 | 0.509372869 | 0.000507795 | 0.146345708 |
| SULF1 | -2.118691427 | 0.899336817 | 0.018480999 | 0.18723812 |  | RHBG | 2.50606853 | 1.156771168 | 0.030278029 | 0.183517505 |  | SPTBN5 | -1.098269578 | 0.463940891 | 0.017920248 | 0.812586619 |
| CASP1 | -1.413049498 | 0.3642765 | 0.000104862 | 0.005037948 |  | CHRM3 | -1.346784239 | 0.489935104 | 0.005979502 | 0.060083136 |  | ACSBG1 | 1.416180223 | 0.685601656 | 0.038866066 | 0.997255808 |
| KCNH5 | -2.042309454 | 0.922857018 | 0.026895638 | 0.230479466 |  | LRRCC1 | -1.074678481 | 0.470140409 | 0.022262036 | 0.151317411 |  | CBFB | 1.081857694 | 0.250976283 | 1.63E-05 | 0.015703425 |
| SERPINA10 | -5.825964761 | 1.931805595 | 0.002562911 | 0.052153114 |  | RERG | -2.346029014 | 0.706529235 | 0.00089857 | 0.014398126 |  | AGRP | -1.721791496 | 0.595903432 | 0.003860022 | 0.416975047 |
| BCL2A1 | -3.676141356 | 1.537018377 | 0.016768924 | 0.175754528 |  | ADAMTS8 | -1.322854275 | 0.54550314 | 0.015307679 | 0.117913377 |  | TAT | -6.224318497 | 2.254516018 | 0.005765601 | NA |
| HUNK | -1.010255553 | 0.36053057 | 0.005076553 | 0.08187109 |  | EHF | -1.229892474 | 0.520788308 | 0.018196376 | 0.133653731 |  | ATP2C2 | 1.054594179 | 0.466063592 | 0.023649942 | 0.8920256 |
| CFAP74 | 1.560865316 | 0.495938777 | 0.00164789 | 0.038487499 |  | FAIM2 | 1.826157649 | 0.463437772 | 8.13E-05 | 0.002084768 |  | CRYBA1 | 3.430419206 | 1.62572292 | 0.034850735 | NA |
| HHIPL2 | -1.900166208 | 0.70038687 | 0.006667233 | 0.097303541 |  | TEC | 1.063343079 | 0.430301315 | 0.013467583 | 0.108623905 |  | OMG | 1.459260328 | 0.464020422 | 0.001661895 | 0.287699603 |
| KCNN3 | 1.626902811 | 0.767191272 | 0.033955808 | 0.263280817 |  | EGR4 | 5.567516915 | 0.992173565 | 2.01E-08 | 1.73E-06 |  | HOXB8 | 5.726552974 | 2.378680148 | 0.016064372 | NA |
| ST6GAL2 | -1.17975339 | 0.520385842 | 0.023385685 | 0.214043661 |  | CCN3 | -1.08863232 | 0.325564197 | 0.000826294 | 0.013569307 |  | MRPL27 | 1.00400037 | 0.349416152 | 0.004061238 | 0.424347795 |
| C1QL2 | -2.36694778 | 0.609227511 | 0.000102262 | 0.004962978 |  | FGFBP1 | -1.230295189 | 0.472938006 | 0.009284741 | 0.084129813 |  | ARSG;AC007780;PRKAR1A | 1.146489139 | 0.251001024 | 4.93E-06 | 0.005549534 |
| ZNF385B | -2.959777504 | 1.503343717 | 0.048976491 | 0.321207704 |  | SULF1 | -1.252266947 | 0.543777092 | 0.021284193 | 0.147101056 |  | SMIM5 | -1.462552855 | 0.630159705 | 0.02029094 | 0.852148443 |
| TMEFF2 | -1.198657251 | 0.553267948 | 0.030272691 | 0.247665208 |  | CH25H | -1.102450378 | 0.457400109 | 0.015941424 | 0.121623091 |  | SKA1 | 1.439765577 | 0.58559792 | 0.013947029 | 0.765555806 |
| GADL1 | -1.137018762 | 0.507241609 | 0.024989025 | 0.221802773 |  | TMEM117 | 1.65680957 | 0.536176148 | 0.002001247 | 0.026466864 |  | FGF22 | -1.69546548 | 0.752984435 | 0.02434372 | 0.903058392 |
| GABRB2 | -4.005782064 | 1.461771753 | 0.006137177 | 0.092000921 |  | BCL2A1 | -6.64072533 | 1.767347523 | 0.000171652 | 0.003908061 |  | ELANE | -6.429614978 | 1.73580857 | 0.000212139 | NA |
| LGSN | -3.461992419 | 1.216254037 | 0.004421126 | 0.074996749 |  | CFAP74 | 1.13662212 | 0.507204973 | 0.025029169 | 0.162666988 |  | ATP5F1D | -1.13276063 | 0.180103243 | 3.18E-10 | 1.08E-06 |
| HMCN2 | 1.231825122 | 0.575320929 | 0.032265207 | 0.257228435 |  | SYPL2 | 1.03039003 | 0.401458146 | 0.010269544 | 0.089938201 |  | PGPEP1 | -1.521468143 | 0.630468408 | 0.015811641 | 0.782492389 |
| ZNF214 | -1.141693113 | 0.490339306 | 0.019892272 | 0.194576876 |  | RGS16 | -1.034227496 | 0.372546863 | 0.005501522 | 0.056695327 |  | LDLRAP1 | -1.188986 | 0.314219897 | 0.000154371 | 0.079951618 |
| PTPRO | -1.435165632 | 0.432555001 | 0.000907034 | 0.02541293 |  | SYT14 | 1.661271596 | 0.754088804 | 0.027593444 | 0.173003077 |  | ZNF573 | 1.012010607 | 0.315441461 | 0.001335519 | 0.255414429 |
| GUCY1A2 | -1.360027149 | 0.340824367 | 6.60E-05 | 0.003550221 |  | KCNN3 | 1.944031637 | 0.67434704 | 0.003941131 | 0.044600191 |  | C19orf85 | -3.665512677 | 1.586262237 | 0.020844674 | NA |
| ADGRF4 | -1.103103768 | 0.322710957 | 0.000630273 | 0.019199192 |  | ST6GAL2 | -1.295811301 | 0.579669298 | 0.025389001 | 0.164042359 |  | ATP6V1C2 | -2.950064952 | 0.740728737 | 6.82E-05 | 0.041828885 |
| AK5 | -1.27845264 | 0.639086311 | 0.045452972 | 0.308729235 |  | C1QL2 | -1.701528964 | 0.53254821 | 0.001397968 | 0.020301721 |  | CENPO | -1.214516523 | 0.606257875 | 0.045145076 | 0.997255808 |
| GBP5 | -3.478902861 | 1.477452134 | 0.018539477 | 0.187450351 |  | TMEFF2 | -1.944614332 | 0.522737651 | 0.000199177 | 0.004415962 |  | SFTPB | -1.49414414 | 0.670225222 | 0.025792854 | 0.921378069 |
| RAET1L | 1.77595047 | 0.900931535 | 0.04869666 | 0.320252679 |  | GADL1 | -2.099553229 | 0.609135723 | 0.000567323 | 0.010242418 |  | LYPD1 | -1.442006854 | 0.337181485 | 1.90E-05 | 0.017079279 |
| MMP16 | -1.038570194 | 0.458687187 | 0.023560387 | 0.214388361 |  | MYH15 | 1.24821756 | 0.472635221 | 0.008266794 | 0.077542963 |  | DNAH7 | 1.469657902 | 0.639306021 | 0.021514413 | 0.867191402 |
| ADAMTS3 | -1.548149772 | 0.512604696 | 0.002526386 | 0.051671817 |  | LGSN | -3.510420259 | 1.223734261 | 0.004122756 | 0.045987441 |  | ABCA12 | -1.211604954 | 0.547359935 | 0.026860207 | 0.931336247 |
| DYNC1I1 | 1.613213797 | 0.714137413 | 0.023885355 | 0.215503693 |  | SLC22A3 | -1.512621185 | 0.568613555 | 0.007809614 | 0.074418895 |  | CATIP | 1.230331909 | 0.570561373 | 0.031056087 | 0.982085108 |
| PADI4 | 1.932243277 | 0.831452561 | 0.020128877 | 0.195645031 |  | CSGALNACT1 | -1.208567243 | 0.330690668 | 0.000257507 | 0.005405983 |  | TUBA4B | -5.921244433 | 2.882160287 | 0.039932486 | NA |
| HS3ST6 | 1.30516341 | 0.650133787 | 0.044693206 | 0.306305708 |  | CDHR1 | 1.181617559 | 0.294125781 | 5.88E-05 | 0.001605746 |  | CCN5 | -1.324812677 | 0.381777126 | 0.000520225 | 0.146345708 |
| LRRC38 | 2.32453447 | 0.804188482 | 0.003845874 | 0.068257567 |  | CDH22 | -1.836698745 | 0.528698569 | 0.000512761 | 0.00943494 |  | YWHAB | 1.023447548 | 0.294484857 | 0.000510125 | 0.146345708 |
| TDRD5 | 1.591512776 | 0.776407184 | 0.040379761 | 0.288914061 |  | ADGRL3 | -1.970644536 | 0.779501521 | 0.011468724 | 0.096504952 |  | EDN2 | -1.565145981 | 0.520854146 | 0.002656156 | 0.352789028 |
| PIGR | 2.879662204 | 0.814527073 | 0.00040719 | 0.013781894 |  | THRB | -1.038682599 | 0.33391389 | 0.001866886 | 0.024872803 |  | APOL2 | -1.271759109 | 0.137939149 | 2.98E-20 | 4.02E-16 |
| SLC15A2 | -2.080683494 | 0.863940149 | 0.016024137 | 0.171960267 |  | TMEM86A | 1.026676487 | 0.230327839 | 8.29E-06 | 0.000311825 |  | ATF4 | 1.067313163 | 0.306253671 | 0.000492022 | 0.146345708 |
| EOMES | 2.098348663 | 1.068112958 | 0.049467716 | 0.323097302 |  | NPAS3 | -2.85828488 | 1.444949789 | 0.047915108 | 0.249567097 |  | GPX1 | -1.20830189 | 0.55575722 | 0.029693557 | 0.966149642 |
| ADAMTS9 | -2.021468649 | 0.553266615 | 0.000258491 | 0.010139227 |  | PTPRO | -1.138644297 | 0.404421681 | 0.004870325 | 0.051566672 |  | RPL29 | -1.877105296 | 0.67801908 | 0.005631257 | 0.524405966 |
| KLF15 | 2.610420327 | 1.170691035 | 0.02575996 | 0.224270455 |  | AKR1C2 | -1.250672716 | 0.349261641 | 0.000342406 | 0.006786342 |  | DIO1 | -1.010239563 | 0.469706871 | 0.031492993 | 0.988127863 |
| HEYL | 1.483202083 | 0.316646621 | 2.81E-06 | 0.000264867 |  | KCNE4 | -1.37129361 | 0.559810502 | 0.01430279 | 0.112596477 |  | ASTE1 | 1.053649914 | 0.221270229 | 1.92E-06 | 0.00255071 |
| RANBP3L | -5.574738347 | 2.391032567 | 0.019725999 | 0.193612127 |  | GUCY1A2 | -1.5215239 | 0.316483615 | 1.53E-06 | 7.48E-05 |  | SLC26A1 | -1.51802152 | 0.403181241 | 0.000166476 | 0.080283105 |
| CCDC112 | -1.335821876 | 0.586091331 | 0.022654924 | 0.2100716 |  | ADGRF4 | -1.095224757 | 0.320368835 | 0.000629356 | 0.011166223 |  | ABRAXAS1 | -1.189265023 | 0.473546087 | 0.012025236 | 0.742822648 |
| EGFLAM | 1.613376865 | 0.690853035 | 0.019525656 | 0.192129768 |  | AK5 | -1.00064375 | 0.479904582 | 0.037061225 | 0.210946983 |  | USP53 | 1.048753572 | 0.434908733 | 0.015889941 | 0.782492389 |
| IL31RA | -1.285643783 | 0.627512362 | 0.040482228 | 0.289357993 |  | ENPP3 | 5.704838737 | 2.413441763 | 0.018089685 | 0.133210074 |  | TIGD4 | 6.337066785 | 1.708248676 | 0.000207516 | NA |
| SLITRK5 | -1.639965712 | 0.365346434 | 7.16E-06 | 0.000575798 |  | PGM5 | -1.177547154 | 0.443024451 | 0.007861213 | 0.074663358 |  | CLDN22 | -6.364181255 | 2.704997626 | 0.018635194 | NA |
| PGM2L1 | -1.027497719 | 0.328297936 | 0.00174942 | 0.040202956 |  | CNTNAP5 | -3.126779485 | 1.362562241 | 0.021745781 | 0.149284375 |  | SPINK6 | 1.724319443 | 0.843871056 | 0.041018328 | NA |
| SLC16A9 | -1.264909876 | 0.316219629 | 6.33E-05 | 0.003459902 |  | LRGUK | 1.175873378 | 0.427310056 | 0.005926804 | 0.059678646 |  | SCGB3A1 | -4.056370422 | 0.834357198 | 1.16E-06 | 0.002224081 |
| HEPACAM | -3.720433693 | 1.618265621 | 0.0215035 | 0.2026765 |  | SLA | -1.786904539 | 0.647273525 | 0.005768404 | 0.058607995 |  | LHFPL5 | 1.557981463 | 0.425322905 | 0.000249224 | 0.099526326 |
| ZMAT1 | -1.266608486 | 0.641586501 | 0.048361058 | 0.318999972 |  | MMP16 | -1.490752268 | 0.586650611 | 0.011049655 | 0.094078987 |  | IRAK1BP1 | 1.106335084 | 0.427350825 | 0.009630495 | 0.674578365 |
| PKD1L2 | -1.016727056 | 0.453740346 | 0.025041077 | 0.222127074 |  | ADAMTS3 | -1.542148687 | 0.527426981 | 0.003456654 | 0.040503088 |  | HS3ST5 | -6.245720807 | 2.246029074 | 0.005422787 | NA |
| GPD1 | 1.610593635 | 0.629838393 | 0.010553255 | 0.131842016 |  | HYDIN | 1.807030784 | 0.630501293 | 0.004156649 | 0.046185349 |  | RAMACL | 2.265782884 | 0.603739375 | 0.00017479 | 0.081385726 |
| ZNF608 | -1.417540032 | 0.558307106 | 0.01111708 | 0.13635837 |  | SLC34A2 | -1.576220669 | 0.691117266 | 0.022567103 | 0.152593066 |  | AC005232;AC004593;CHN2 | 1.333780066 | 0.447051927 | 0.002849707 | 0.363015034 |
| PARM1 | -1.388432924 | 0.237692618 | 5.18E-09 | 1.48E-06 |  | CABP1 | 1.906364116 | 0.747079926 | 0.01071822 | 0.092480987 |  | ACHE | -1.411792736 | 0.597023002 | 0.018043666 | 0.812586619 |
| PTAFR | 1.180340863 | 0.568747798 | 0.037955717 | 0.279820805 |  | TNFRSF14 | 2.794725348 | 1.157521173 | 0.015760916 | 0.120739387 |  | CD160 | -1.770810252 | 0.576583392 | 0.002131912 | 0.315853491 |
| SCN9A | -2.206182794 | 0.686038917 | 0.00130069 | 0.032959255 |  | POM121L2 | 5.729462516 | 2.38377299 | 0.016237772 | 0.122971212 |  | OR2A42 | 1.473384656 | 0.568663926 | 0.009570902 | 0.674578365 |
| PSG6 | -3.394689563 | 1.521003433 | 0.025623224 | 0.223815536 |  | GJD2 | -3.982318862 | 1.391013535 | 0.004197962 | 0.046536571 |  | OR2A1 | 1.402463479 | 0.594028602 | 0.018228879 | 0.812586619 |
| PLAC1 | -2.516095507 | 0.89448237 | 0.004909588 | 0.080332089 |  | GOLGA6A | 5.134719937 | 1.737129541 | 0.003117938 | 0.03720073 |  | H4C15 | 3.083801026 | 1.073185857 | 0.004059493 | 0.424347795 |
| VAT1L | -1.093260666 | 0.345690939 | 0.001564004 | 0.036768225 |  | PADI4 | 1.967661538 | 0.776509506 | 0.011277435 | 0.095397418 |  | SPINK4 | -1.415969437 | 0.687474795 | 0.039430346 | 0.997255808 |
| FBXW10 | -1.683565859 | 0.858896288 | 0.04997822 | 0.324301764 |  | LRRC38 | 2.021168633 | 0.824826417 | 0.014269088 | 0.112564639 |  | STX17 | 1.612226384 | 0.229728925 | 2.25E-12 | 1.01E-08 |
| AZU1 | 1.352610359 | 0.629787853 | 0.031735704 | 0.25411637 |  | WDR63 | 2.258446328 | 1.145985156 | 0.04875287 | 0.251912206 |  | TRIM32 | -1.161522417 | 0.575312894 | 0.043493419 | 0.997255808 |
| BNC2 | -1.093084346 | 0.363363972 | 0.002627696 | 0.052912402 |  | GFI1 | 1.298429082 | 0.595376818 | 0.02919432 | 0.179515577 |  | CEL | -1.562098415 | 0.77712048 | 0.044419444 | 0.997255808 |
| ADCY5 | 1.423043974 | 0.203055139 | 2.41E-12 | 1.57E-09 |  | VCAM1 | -3.542053545 | 1.575733493 | 0.024584096 | 0.160937471 |  | DNAJC12 | 2.756384859 | 1.201291595 | 0.021760778 | NA |
| PHOSPHO1 | 1.601468315 | 0.661326785 | 0.015452389 | 0.167854215 |  | LRATD1 | -1.36761793 | 0.304992411 | 7.32E-06 | 0.000283503 |  | FFAR4 | 1.666961711 | 0.768290596 | 0.030029422 | 0.967750073 |
| ZCCHC12 | 1.258278068 | 0.601303823 | 0.036386409 | 0.273001071 |  | DUSP19 | 1.220689866 | 0.485638978 | 0.011951445 | 0.09936422 |  | DTX4 | -1.040957198 | 0.353183593 | 0.003205057 | 0.370657547 |
| P2RY2 | 6.874709099 | 3.272245196 | 0.035648426 | 0.269756088 |  | ADAMTS9 | -1.24005402 | 0.522476555 | 0.017624419 | 0.131261785 |  | GPRASP1 | 1.2883144 | 0.524551793 | 0.014048183 | 0.765905504 |
| FBXO39 | 2.52861049 | 1.246080974 | 0.042432778 | 0.295913339 |  | HEYL | 1.560069699 | 0.303142766 | 2.66E-07 | 1.62E-05 |  | FOXR1 | 4.785439741 | 2.202172834 | 0.029776279 | NA |
| KLHDC7A | 2.223818257 | 1.072444651 | 0.038116733 | 0.280286216 |  | IL15 | -1.256698292 | 0.499281347 | 0.011835402 | 0.098667211 |  | CACNA1C | 1.578802091 | 0.579684928 | 0.006458403 | 0.576028692 |
| GPC5 | 1.338709542 | 0.598510371 | 0.025303616 | 0.223348874 |  | GRIK2 | -1.775472228 | 0.734742205 | 0.015672419 | 0.120144081 |  | GABARAPL1 | -1.034666088 | 0.315060604 | 0.001023368 | 0.219341828 |
| MUC16 | -1.617892171 | 0.397728684 | 4.75E-05 | 0.002717552 |  | ZMAT4 | -1.008579347 | 0.373298681 | 0.006896469 | 0.067368159 |  | RESF1 | -1.503257696 | 0.479322363 | 0.00171144 | 0.288869748 |
| USH1G | 1.352819599 | 0.582265587 | 0.020159173 | 0.195753113 |  | SLITRK5 | -2.212824876 | 0.362948603 | 1.08E-09 | 1.28E-07 |  | ANKS1B | 1.416217658 | 0.720589891 | 0.049372728 | 0.997255808 |
| MAFA | 1.436551349 | 0.353394217 | 4.80E-05 | 0.002739636 |  | SLC7A3 | 1.059712214 | 0.528687453 | 0.045024985 | 0.239860983 |  | RNF113B | -3.56762433 | 1.492987935 | 0.016867336 | NA |
| GRID1 | -1.213330822 | 0.56430315 | 0.031544136 | 0.253290741 |  | PKD1L2 | -1.558694091 | 0.390250303 | 6.49E-05 | 0.001738359 |  |  |  |  |  |  |
| PLCXD3 | -2.200087402 | 0.458044949 | 1.56E-06 | 0.000158543 |  | ZCCHC18 | 1.561281965 | 0.689830931 | 0.023618308 | 0.157210905 |  |  |  |  |  |  |
| EPHA10 | 1.426549262 | 0.597312149 | 0.016927393 | 0.177156058 |  | TMEM92 | -1.514392002 | 0.742095556 | 0.041280977 | 0.22576662 |  |  |  |  |  |  |
| CABCOCO1 | -7.189201907 | 1.56836257 | 4.56E-06 | 0.000398435 |  | GPD1 | 1.269052389 | 0.631206083 | 0.044376193 | 0.237990696 |  |  |  |  |  |  |
| GRIN2A | -1.487591799 | 0.414896045 | 0.000336489 | 0.012227185 |  | CD300C | 6.254256137 | 1.70792043 | 0.000250339 | 0.005289464 |  |  |  |  |  |  |
| PSG9 | -1.306228809 | 0.548137412 | 0.017170717 | 0.17870389 |  | COL3A1 | -1.395050754 | 0.295666072 | 2.38E-06 | 0.000108965 |  |  |  |  |  |  |
| KCNH8 | 3.186936204 | 1.609489286 | 0.047693238 | 0.31656193 |  | GDNF | 2.101448709 | 1.046887547 | 0.044714544 | 0.238826123 |  |  |  |  |  |  |
| KCNQ3 | -1.873998934 | 0.378219378 | 7.24E-07 | 9.17E-05 |  | MUCL3 | 1.5247973 | 0.651699253 | 0.019297923 | 0.138700203 |  |  |  |  |  |  |
| PRR16 | -1.480054549 | 0.42814406 | 0.000546412 | 0.017168235 |  | CXXC4 | -5.807762946 | 2.369787499 | 0.014255789 | 0.112564639 |  |  |  |  |  |  |
| CYP4F2 | 3.40205409 | 1.269381381 | 0.007360276 | 0.104024748 |  | PARM1 | -1.956111603 | 0.258894296 | 4.17E-14 | 1.03E-11 |  |  |  |  |  |  |
| SOWAHB | 1.601344957 | 0.764162783 | 0.036121706 | 0.271833507 |  | FAM110B | -1.507367307 | 0.692382004 | 0.029474998 | 0.18068601 |  |  |  |  |  |  |
| LCE1E | 3.493913252 | 1.398925403 | 0.012504799 | 0.145909707 |  | PTAFR | 1.228367552 | 0.533556388 | 0.021322413 | 0.147220827 |  |  |  |  |  |  |
| QRFPR | -1.891413953 | 0.519418378 | 0.000271152 | 0.010435692 |  | SCN9A | -1.125420551 | 0.545815332 | 0.039216574 | 0.21863126 |  |  |  |  |  |  |
| GABRD | 1.438324661 | 0.29407713 | 1.00E-06 | 0.00011872 |  | ADRA1B | -1.09988838 | 0.527657085 | 0.037116917 | 0.210954427 |  |  |  |  |  |  |
| ZFP69B | -1.117539738 | 0.442167289 | 0.011490601 | 0.138244477 |  | SDR16C5 | -1.058515209 | 0.391139506 | 0.006805098 | 0.066702014 |  |  |  |  |  |  |
| CLCN1 | 6.807575374 | 1.652805716 | 3.81E-05 | 0.002318556 |  | PSG6 | -2.134118114 | 1.035936234 | 0.039390285 | 0.219259887 |  |  |  |  |  |  |
| FAM78B | -1.58731512 | 0.384069482 | 3.58E-05 | 0.002210727 |  | PLAC1 | -1.241122872 | 0.547981551 | 0.023518878 | 0.156963418 |  |  |  |  |  |  |
| KLRG2 | 1.502375626 | 0.594035662 | 0.011435542 | 0.137813685 |  | KRT15 | -1.012920889 | 0.506538766 | 0.045533667 | 0.241605568 |  |  |  |  |  |  |
| CGB5 | 3.480525239 | 1.300329436 | 0.007436253 | 0.104582358 |  | PDE7B | -1.309204027 | 0.23619983 | 2.98E-08 | 2.38E-06 |  |  |  |  |  |  |
| IL1RAPL2 | -6.253788171 | 1.770630767 | 0.0004125 | 0.013889129 |  | FGA | -3.639851918 | 1.399933181 | 0.009321878 | 0.084156801 |  |  |  |  |  |  |
| PCDH18 | -1.490202676 | 0.382957986 | 9.97E-05 | 0.004872198 |  | VAT1L | -1.484154861 | 0.325486599 | 5.12E-06 | 0.000208708 |  |  |  |  |  |  |
| CACNA1H | 1.026920147 | 0.257195709 | 6.53E-05 | 0.003541792 |  | ZNF570 | 1.016770709 | 0.437489368 | 0.020119931 | 0.142333177 |  |  |  |  |  |  |
| CYRIA | 1.742650154 | 0.686545136 | 0.011139587 | 0.13635837 |  | ADRA1D | -1.284230456 | 0.383924524 | 0.000822803 | 0.013569307 |  |  |  |  |  |  |
| HRNR | 6.310662338 | 1.759034352 | 0.000333772 | 0.012221505 |  | ADCY5 | 1.317678199 | 0.187771859 | 2.26E-12 | 3.92E-10 |  |  |  |  |  |  |
| AVPR1B | 2.231859988 | 1.021655994 | 0.028921758 | 0.241020261 |  | MAB21L3 | -2.89179597 | 1.071350932 | 0.006950531 | 0.067804199 |  |  |  |  |  |  |
| ARC | 2.078773823 | 0.400798866 | 2.14E-07 | 3.48E-05 |  | CD7 | -1.397071256 | 0.615655227 | 0.023253558 | 0.155843247 |  |  |  |  |  |  |
| CDSN | 3.941624787 | 0.728047847 | 6.16E-08 | 1.13E-05 |  | PHOSPHO1 | 1.70266163 | 0.617338251 | 0.005814388 | 0.05889392 |  |  |  |  |  |  |
| SERPINB4 | -2.542819151 | 0.566774219 | 7.24E-06 | 0.000575798 |  | SLC26A9 | -1.850196284 | 0.265150269 | 3.00E-12 | 5.01E-10 |  |  |  |  |  |  |
| AC109583 | 1.763836255 | 0.833903772 | 0.034416685 | 0.265045647 |  | CMKLR1 | -1.640587206 | 0.380815337 | 1.65E-05 | 0.000558828 |  |  |  |  |  |  |
| DIO2 | -1.211726136 | 0.314460314 | 0.000116512 | 0.005415913 |  | KCNE3 | 1.199933777 | 0.343249878 | 0.000472638 | 0.008909358 |  |  |  |  |  |  |
| TM6SF2 | 1.37207573 | 0.513972261 | 0.007595249 | 0.105882353 |  | TMEM270 | 3.327723924 | 1.278299622 | 0.00923466 | 0.083781764 |  |  |  |  |  |  |
| PSG1 | -1.638115648 | 0.552685555 | 0.003037475 | 0.057983365 |  | ERICH5 | 1.464409914 | 0.557480776 | 0.008618316 | 0.079748519 |  |  |  |  |  |  |
| HLA-DQA2 | 6.134995719 | 2.21788689 | 0.005672339 | 0.087446932 |  | NHLH2 | 2.864858579 | 1.271800364 | 0.024284328 | 0.160197304 |  |  |  |  |  |  |
| GSTA1 | -7.088816132 | 1.547837642 | 4.65E-06 | 0.000399828 |  | SAMD12 | -1.285521902 | 0.503176601 | 0.010624499 | 0.091872548 |  |  |  |  |  |  |
| PTCHD4 | -4.668427113 | 1.142068044 | 4.36E-05 | 0.002556396 |  | CALHM5 | 2.162727453 | 1.035161302 | 0.036683773 | 0.209295325 |  |  |  |  |  |  |
| TMEM179 | -1.447434217 | 0.508892586 | 0.004451158 | 0.075254347 |  | MAF | -1.438626627 | 0.311679193 | 3.92E-06 | 0.000168252 |  |  |  |  |  |  |
| FRRS1L | 1.017186633 | 0.407318341 | 0.012515123 | 0.145911254 |  | CDH5 | -1.166586497 | 0.566099603 | 0.039327447 | 0.219164457 |  |  |  |  |  |  |
| ANKRD20A1 | -3.975249471 | 1.948299873 | 0.041313648 | 0.291773127 |  | KCNE1 | -1.102840035 | 0.517183283 | 0.032974231 | 0.194533091 |  |  |  |  |  |  |
| SFTA3;NKX2-1 | 3.81407699 | 1.827520201 | 0.036886041 | 0.274877979 |  | MUC16 | -1.572308256 | 0.3770874 | 3.05E-05 | 0.000936108 |  |  |  |  |  |  |
| PDZD4 | 1.025482577 | 0.215861686 | 2.03E-06 | 0.000197484 |  | TNFSF15 | -1.851408981 | 0.80811072 | 0.021961458 | 0.150132718 |  |  |  |  |  |  |
| CDKL1 | -1.012916287 | 0.447386976 | 0.023569692 | 0.214388361 |  | USH1G | 1.161077923 | 0.586175153 | 0.047617118 | 0.248607658 |  |  |  |  |  |  |
| ESR2;AL161756 | -1.040526612 | 0.35845636 | 0.003698444 | 0.066576286 |  | IFNL1 | 3.129420548 | 1.179512492 | 0.007974503 | 0.075391014 |  |  |  |  |  |  |
| FOS | 1.215142532 | 0.217240731 | 2.22E-08 | 4.94E-06 |  | MAFA | 1.467972531 | 0.432743794 | 0.000693227 | 0.011916668 |  |  |  |  |  |  |
| SERPINA4;SERPINA5;AL049839;SERPINA3 | -1.130260751 | 0.188064054 | 1.86E-09 | 6.49E-07 |  | GRID1 | -1.103963053 | 0.485215669 | 0.02289389 | 0.154295168 |  |  |  |  |  |  |
| DIO3 | -1.086296688 | 0.222410383 | 1.04E-06 | 0.00012088 |  | PLCXD3 | -2.645281522 | 0.536390298 | 8.15E-07 | 4.36E-05 |  |  |  |  |  |  |
| BMF | -1.13402152 | 0.187579025 | 1.49E-09 | 5.61E-07 |  | WFDC10B | -1.553439175 | 0.661777126 | 0.018906209 | 0.137117659 |  |  |  |  |  |  |
| WDR76 | -1.024417655 | 0.253934736 | 5.48E-05 | 0.003052475 |  | CCBE1 | -1.159006989 | 0.23565636 | 8.73E-07 | 4.57E-05 |  |  |  |  |  |  |
| ATP8B4 | -1.146945948 | 0.462550079 | 0.013152444 | 0.150763445 |  | EPHA10 | 1.180315899 | 0.599746002 | 0.049065013 | 0.252601578 |  |  |  |  |  |  |
| NTRK3 | -1.977247512 | 0.340693311 | 6.49E-09 | 1.79E-06 |  | GRIN2A | -1.523956439 | 0.51046048 | 0.002831574 | 0.034543001 |  |  |  |  |  |  |
| ST8SIA2 | -1.074829847 | 0.243136256 | 9.84E-06 | 0.000733646 |  | PSG9 | -2.371554317 | 0.646215527 | 0.000242634 | 0.005179905 |  |  |  |  |  |  |
| SOX8 | 1.149822789 | 0.550829583 | 0.03684853 | 0.274877979 |  | GPR1 | -1.070258851 | 0.472439432 | 0.02348885 | 0.156860999 |  |  |  |  |  |  |
| PLK1 | 1.063316015 | 0.169307076 | 3.38E-10 | 1.56E-07 |  | EFHC2 | 5.844474856 | 1.841150999 | 0.001501677 | 0.021351407 |  |  |  |  |  |  |
| IL21R | -3.466122226 | 1.124022881 | 0.002044602 | 0.044554902 |  | ACP7 | 2.071679904 | 0.894208605 | 0.020516006 | 0.144304747 |  |  |  |  |  |  |
| RRAD | 1.818185978 | 0.302540397 | 1.86E-09 | 6.49E-07 |  | PRR16 | -1.45319167 | 0.329480979 | 1.03E-05 | 0.000374657 |  |  |  |  |  |  |
| ESPN | 2.008555482 | 0.588193483 | 0.000638319 | 0.019280196 |  | KPNA7 | -2.159570468 | 0.903933896 | 0.01689062 | 0.12704607 |  |  |  |  |  |  |
| TAT | 6.142379308 | 2.223320082 | 0.005732441 | 0.088059395 |  | GLDN | -1.667177741 | 0.379778887 | 1.13E-05 | 0.000405975 |  |  |  |  |  |  |
| PLEKHG5 | 1.171197493 | 0.177310683 | 3.97E-11 | 2.27E-08 |  | TNFRSF4 | 2.646178934 | 1.089374438 | 0.015137143 | 0.117231875 |  |  |  |  |  |  |
| ATP2C2 | -1.459696848 | 0.492035972 | 0.003010668 | 0.05761942 |  | QRFPR | -1.946461897 | 0.382562197 | 3.62E-07 | 2.13E-05 |  |  |  |  |  |  |
| SLC52A1 | 1.577701084 | 0.266569776 | 3.25E-09 | 1.02E-06 |  | SLC18A3 | -1.7860726 | 0.412846395 | 1.52E-05 | 0.000519635 |  |  |  |  |  |  |
| CASZ1 | 1.143941956 | 0.206613822 | 3.08E-08 | 6.43E-06 |  | GABRD | 1.131119137 | 0.291165818 | 0.000102417 | 0.002527745 |  |  |  |  |  |  |
| DRAXIN | 1.851627673 | 0.31761811 | 5.55E-09 | 1.56E-06 |  | COL14A1 | -1.400169538 | 0.495426558 | 0.004710533 | 0.05044213 |  |  |  |  |  |  |
| C1orf167 | 4.748115637 | 1.636116632 | 0.003707125 | 0.066593354 |  | CLCN1 | 6.049558991 | 1.837592037 | 0.00099438 | 0.015688738 |  |  |  |  |  |  |
| GAS2L2 | 6.376384743 | 2.158179603 | 0.003131559 | 0.059148453 |  | FAM78B | -1.955872728 | 0.448671182 | 1.31E-05 | 0.000454682 |  |  |  |  |  |  |
| MMP28 | -1.39206216 | 0.310243165 | 7.22E-06 | 0.000575798 |  | KLRG2 | 1.766026173 | 0.580745328 | 0.002358213 | 0.029870006 |  |  |  |  |  |  |
| PPP1R1B | 1.255463295 | 0.553140157 | 0.023225673 | 0.213299674 |  | IL1RAPL2 | -6.435859401 | 1.727783763 | 0.000195376 | 0.004351799 |  |  |  |  |  |  |
| HAP1 | 1.615549804 | 0.319835253 | 4.39E-07 | 6.04E-05 |  | PCDH18 | -2.180930851 | 0.385073448 | 1.48E-08 | 1.36E-06 |  |  |  |  |  |  |
| RND2 | 1.209963424 | 0.250340773 | 1.34E-06 | 0.000146789 |  | MME | -1.117629244 | 0.375409781 | 0.002909972 | 0.035156666 |  |  |  |  |  |  |
| HOXB8 | -5.927102705 | 1.914931006 | 0.001966774 | 0.043656277 |  | TMEM26 | -2.448008379 | 0.888233925 | 0.005850581 | 0.059117986 |  |  |  |  |  |  |
| NGFR | 1.182173045 | 0.245944508 | 1.53E-06 | 0.000156943 |  | DMBX1 | 1.001273143 | 0.506367216 | 0.048000313 | 0.249588751 |  |  |  |  |  |  |
| SAMD14 | 1.763841297 | 0.451676912 | 9.42E-05 | 0.004715015 |  | SERPINB2 | 2.420544756 | 0.870222898 | 0.005410454 | 0.056048257 |  |  |  |  |  |  |
| ARSG;AC007780;PRKAR1A | -1.136767422 | 0.191641598 | 3.00E-09 | 9.75E-07 |  | HRNR | 5.94623661 | 2.291403804 | 0.009458567 | 0.0851689 |  |  |  |  |  |  |
| ARHGAP28 | -1.043636471 | 0.297456941 | 0.000450591 | 0.014796132 |  | ZNF560 | 1.129165692 | 0.500388356 | 0.024034414 | 0.159002845 |  |  |  |  |  |  |
| ELANE | 3.578600107 | 1.505973129 | 0.017488618 | 0.180392327 |  | AVPR1B | 2.382164508 | 0.971245194 | 0.014179202 | 0.11241021 |  |  |  |  |  |  |
| TUBB4A | 1.169012257 | 0.193178453 | 1.44E-09 | 5.55E-07 |  | TMEM239 | -3.545393121 | 1.535927633 | 0.020982045 | 0.145985526 |  |  |  |  |  |  |
| CRB3 | 2.500610902 | 0.536634263 | 3.17E-06 | 0.000294251 |  | ARC | 2.280553367 | 0.378989531 | 1.77E-09 | 2.04E-07 |  |  |  |  |  |  |
| ICAM4 | 1.53490555 | 0.759693583 | 0.043339098 | 0.300477419 |  | BRINP2 | -2.106532178 | 1.016208724 | 0.038178554 | 0.214758097 |  |  |  |  |  |  |
| PDE4A | 1.29740038 | 0.228856423 | 1.44E-08 | 3.48E-06 |  | CES1 | -2.361505447 | 1.023069245 | 0.020984917 | 0.145985526 |  |  |  |  |  |  |
| CYP4F22 | 1.343128953 | 0.530931931 | 0.011414143 | 0.137671687 |  | ZDBF2 | 1.03293271 | 0.243935959 | 2.29E-05 | 0.00073754 |  |  |  |  |  |  |
| GDF15 | 1.14600615 | 0.201587133 | 1.31E-08 | 3.29E-06 |  | HLA-DOA | 1.031932829 | 0.35869862 | 0.004016285 | 0.045148691 |  |  |  |  |  |  |
| TMEM59L | 1.115738169 | 0.46042431 | 0.015380961 | 0.167205178 |  | COL15A1 | -1.482933595 | 0.267219881 | 2.87E-08 | 2.30E-06 |  |  |  |  |  |  |
| COMP | 2.556969864 | 1.229930449 | 0.037621501 | 0.277785989 |  | LST1 | -3.420203738 | 1.661970798 | 0.039597768 | 0.219663706 |  |  |  |  |  |  |
| ZNF101 | -1.233174603 | 0.392286336 | 0.001669077 | 0.03866695 |  | CD177 | -1.307750188 | 0.573769149 | 0.02265357 | 0.153033903 |  |  |  |  |  |  |
| GRHL3 | 1.58010784 | 0.463167519 | 0.000646004 | 0.019471252 |  | ARID3C | 1.417058663 | 0.536861908 | 0.00830231 | 0.077774704 |  |  |  |  |  |  |
| ZNF382 | -1.310341879 | 0.40572252 | 0.001239417 | 0.032263149 |  | SERPINB4 | -1.887030898 | 0.475577431 | 7.25E-05 | 0.00190063 |  |  |  |  |  |  |
| SERTAD1 | 1.085615686 | 0.173172845 | 3.63E-10 | 1.58E-07 |  | DIO2 | -1.270580392 | 0.268378007 | 2.20E-06 | 0.000102031 |  |  |  |  |  |  |
| FOSB | 1.252156667 | 0.318866675 | 8.60E-05 | 0.004399855 |  | TM6SF2 | 1.453741398 | 0.538415559 | 0.006933197 | 0.067680986 |  |  |  |  |  |  |
| SULT2B1 | 1.045165101 | 0.517980988 | 0.043615502 | 0.301372171 |  | SETSIP | -1.355779405 | 0.554815687 | 0.01453923 | 0.113884038 |  |  |  |  |  |  |
| NAPSA | 1.002732186 | 0.494764084 | 0.042694381 | 0.297008463 |  | PSG1 | -1.713763438 | 0.450359762 | 0.00014162 | 0.003313458 |  |  |  |  |  |  |
| GPR3 | 1.230636303 | 0.235137953 | 1.66E-07 | 2.77E-05 |  | GSTA1 | -2.845317614 | 1.052393007 | 0.006857949 | 0.067128593 |  |  |  |  |  |  |
| FPR1 | -1.867706209 | 0.745978799 | 0.012290262 | 0.144347564 |  | PCP4L1 | 2.161027412 | 0.878163678 | 0.013860904 | 0.110496605 |  |  |  |  |  |  |
| IL11 | 1.159425227 | 0.196129173 | 3.39E-09 | 1.03E-06 |  | TRMT9B | -1.255721687 | 0.406633168 | 0.002014443 | 0.02661692 |  |  |  |  |  |  |
| SMPDL3B | 1.447180559 | 0.58831358 | 0.013898364 | 0.157547807 |  | TMEM179 | -1.568484118 | 0.518239418 | 0.002473515 | 0.030975982 |  |  |  |  |  |  |
| GREB1 | 1.158868082 | 0.350896859 | 0.000957967 | 0.026375413 |  | FRRS1L | 1.083619233 | 0.343885766 | 0.001626555 | 0.022767023 |  |  |  |  |  |  |
| MSH6 | -1.208784812 | 0.307784555 | 8.59E-05 | 0.004399855 |  | TCF24 | 2.050026503 | 0.945427683 | 0.030131392 | 0.182792965 |  |  |  |  |  |  |
| TLX2 | 1.85985574 | 0.522987788 | 0.00037624 | 0.013042673 |  | PRR33 | 6.114520317 | 1.804744049 | 0.000703975 | 0.012032165 |  |  |  |  |  |  |
| MERTK | 1.706662807 | 0.798264348 | 0.032519424 | 0.257796566 |  | EGLN3 | -1.305662435 | 0.270260825 | 1.36E-06 | 6.74E-05 |  |  |  |  |  |  |
| MCM6 | -1.394915233 | 0.157625898 | 8.79E-19 | 1.26E-15 |  | UNC79;AL157858 | 1.074129842 | 0.522095862 | 0.039653322 | 0.219873469 |  |  |  |  |  |  |
| DPP4 | -1.109375568 | 0.185001162 | 2.02E-09 | 6.87E-07 |  | SERPINA4;SERPINA5;AL049839;SERPINA3 | -1.872965316 | 0.185153861 | 4.71E-24 | 4.51E-21 |  |  |  |  |  |  |
| DNAH7 | -2.180648706 | 0.599167008 | 0.000273203 | 0.010486441 |  | DIO3 | -1.536877035 | 0.189611357 | 5.26E-16 | 1.61E-13 |  |  |  |  |  |  |
| AOX1 | -1.090672653 | 0.197117436 | 3.15E-08 | 6.43E-06 |  | TRAF3 | 1.00234559 | 0.317272244 | 0.001581702 | 0.022269185 |  |  |  |  |  |  |
| ABI2 | 1.16492523 | 0.298375262 | 9.45E-05 | 0.004715451 |  | ZFY | 1.203197064 | 0.250232009 | 1.52E-06 | 7.47E-05 |  |  |  |  |  |  |
| NRP2 | -1.186485477 | 0.189672549 | 3.96E-10 | 1.67E-07 |  | BMF | -1.910376916 | 0.204567718 | 9.76E-21 | 6.11E-18 |  |  |  |  |  |  |
| IGFBP5 | -1.590623455 | 0.149193194 | 1.54E-26 | 7.35E-23 |  | SEMA6D | -1.549238783 | 0.332244361 | 3.12E-06 | 0.000139725 |  |  |  |  |  |  |
| INPP5D | 1.750461377 | 0.343747668 | 3.54E-07 | 5.15E-05 |  | ATP8B4 | -2.016531501 | 0.476906165 | 2.35E-05 | 0.00075438 |  |  |  |  |  |  |
| UGT1A8;UGT1A10;UGT1A9;UGT1A7;UGT1A6;UGT1A5;UGT1A4;UGT1A3;UGT1A1 | -1.024806089 | 0.195507443 | 1.59E-07 | 2.68E-05 |  | SLC27A2 | -1.234317085 | 0.183304191 | 1.65E-11 | 2.59E-09 |  |  |  |  |  |  |
| AL049634;SIRPD;SIRPB1 | 2.174823236 | 0.443654718 | 9.48E-07 | 0.000113147 |  | CA12 | -1.073675513 | 0.174752758 | 8.05E-10 | 9.73E-08 |  |  |  |  |  |  |
| BPIFA2 | -1.031221436 | 0.504443237 | 0.040926243 | 0.291190018 |  | ACE2;AC097625;CLTRN | 1.160830746 | 0.588200944 | 0.048435493 | 0.251058469 |  |  |  |  |  |  |
| BPIFA1 | -1.029144219 | 0.175259616 | 4.30E-09 | 1.28E-06 |  | ISLR | -1.128921533 | 0.447177778 | 0.011584735 | 0.097253651 |  |  |  |  |  |  |
| YWHAB | -1.114657096 | 0.263862418 | 2.40E-05 | 0.001602912 |  | LINGO1 | -1.155826617 | 0.293646118 | 8.28E-05 | 0.002108925 |  |  |  |  |  |  |
| UBE2C | 1.04412839 | 0.163377768 | 1.65E-10 | 8.14E-08 |  | ACSBG1 | 2.06923676 | 0.734424361 | 0.004839991 | 0.051434735 |  |  |  |  |  |  |
| MMP9 | -1.69624517 | 0.538502074 | 0.001633082 | 0.038266507 |  | CEMIP | -1.083305516 | 0.12457725 | 3.44E-18 | 1.71E-15 |  |  |  |  |  |  |
| EDN2 | -1.120423641 | 0.310496071 | 0.000307978 | 0.011512587 |  | MEX3B | -1.060721044 | 0.144923186 | 2.49E-13 | 5.28E-11 |  |  |  |  |  |  |
| PTGIS | -1.127259466 | 0.145066133 | 7.81E-15 | 9.32E-12 |  | NTRK3 | -2.358732654 | 0.321305218 | 2.12E-13 | 4.55E-11 |  |  |  |  |  |  |
| CYP24A1 | -1.266716772 | 0.233652378 | 5.91E-08 | 1.11E-05 |  | ST8SIA2 | -1.153930536 | 0.213281393 | 6.29E-08 | 4.74E-06 |  |  |  |  |  |  |
| AURKA | 1.096915235 | 0.155003347 | 1.48E-12 | 1.06E-09 |  | SOX8 | 1.093989357 | 0.49888384 | 0.028316465 | 0.175926432 |  |  |  |  |  |  |
| NKAIN4 | -1.33086252 | 0.61140529 | 0.029500928 | 0.244000456 |  | CCDC154 | -1.924306438 | 0.847522779 | 0.023176837 | 0.155473894 |  |  |  |  |  |  |
| DERL3 | -1.10342789 | 0.30275143 | 0.000267739 | 0.010359395 |  | RPL3L | 6.080929259 | 2.269642972 | 0.007378841 | 0.071114634 |  |  |  |  |  |  |
| APOL1 | 1.171663821 | 0.576553947 | 0.042135012 | 0.294410426 |  | TFAP4 | -1.049051106 | 0.196188821 | 8.93E-08 | 6.27E-06 |  |  |  |  |  |  |
| CAMKV | 1.439658729 | 0.48368522 | 0.002916187 | 0.056420338 |  | MMP23B | 1.64059952 | 0.744346155 | 0.02751862 | 0.172835188 |  |  |  |  |  |  |
| CACNA2D2 | 1.076208178 | 0.207871698 | 2.25E-07 | 3.58E-05 |  | IL21R | -1.661918785 | 0.751202817 | 0.026942929 | 0.170334713 |  |  |  |  |  |  |
| FHIT | 1.457291712 | 0.417075891 | 0.000475719 | 0.015374423 |  | NPIPB13 | -4.764963976 | 1.150344003 | 3.44E-05 | 0.0010333 |  |  |  |  |  |  |
| CCDC80 | -1.056543123 | 0.14038738 | 5.24E-14 | 5.35E-11 |  | MMP2;AC007336 | -1.274157297 | 0.142155181 | 3.16E-19 | 1.62E-16 |  |  |  |  |  |  |
| CP | -1.000992217 | 0.243077764 | 3.82E-05 | 0.002318556 |  | RRAD | 1.249741504 | 0.279223999 | 7.61E-06 | 0.000289826 |  |  |  |  |  |  |
| RARRES1 | -1.55494637 | 0.218452136 | 1.09E-12 | 8.25E-10 |  | CBFB | 1.120124969 | 0.249209517 | 6.97E-06 | 0.000273133 |  |  |  |  |  |  |
| EPHB3 | 1.054612964 | 0.194953764 | 6.32E-08 | 1.15E-05 |  | ESPN | 1.961837312 | 0.559846848 | 0.000457914 | 0.008681055 |  |  |  |  |  |  |
| KANK4 | -1.015984734 | 0.168200154 | 1.54E-09 | 5.65E-07 |  | PLEKHG5 | 1.163100168 | 0.171181769 | 1.09E-11 | 1.74E-09 |  |  |  |  |  |  |
| SLBP | -1.092875574 | 0.244571857 | 7.88E-06 | 0.000609522 |  | SLC52A1 | 1.220354061 | 0.256305697 | 1.92E-06 | 8.99E-05 |  |  |  |  |  |  |
| DOK7 | 1.218998716 | 0.496711955 | 0.014122354 | 0.158797408 |  | DRAXIN | 1.532686664 | 0.341904093 | 7.37E-06 | 0.000283503 |  |  |  |  |  |  |
| AREG | 3.190381675 | 0.811154849 | 8.38E-05 | 0.00431802 |  | ASIC2;AC024610;AC004147;LINC01989 | -1.116058902 | 0.191436179 | 5.55E-09 | 5.70E-07 |  |  |  |  |  |  |
| DDIT4L | -1.351495799 | 0.420782724 | 0.00131878 | 0.033069984 |  | TBC1D3H | -6.640187079 | 2.602353974 | 0.01072271 | 0.092480987 |  |  |  |  |  |  |
| ELOVL6 | -1.090220014 | 0.352760532 | 0.001997939 | 0.044006909 |  | GAS2L2 | 6.236705078 | 1.791441676 | 0.000498821 | 0.009237493 |  |  |  |  |  |  |
| USP53 | -1.156860777 | 0.417601539 | 0.005601323 | 0.087072907 |  | MMP28 | -1.664117078 | 0.29337701 | 1.41E-08 | 1.30E-06 |  |  |  |  |  |  |
| FGB | -1.500913963 | 0.262882081 | 1.13E-08 | 3.06E-06 |  | PPP1R1B | 1.121941719 | 0.501499164 | 0.025274862 | 0.163525175 |  |  |  |  |  |  |
| FGG | -1.637465345 | 0.260970675 | 3.51E-10 | 1.57E-07 |  | KRT19 | -1.104686821 | 0.177826686 | 5.23E-10 | 6.65E-08 |  |  |  |  |  |  |
| GASK1B | -1.720390265 | 0.241326095 | 1.01E-12 | 8.05E-10 |  | HAP1 | 1.637243013 | 0.291475265 | 1.94E-08 | 1.69E-06 |  |  |  |  |  |  |
| GPX8 | 1.076094326 | 0.278185113 | 0.000109612 | 0.005193595 |  | SP6 | 1.203519147 | 0.292332826 | 3.84E-05 | 0.001132019 |  |  |  |  |  |  |
| EGR1 | 2.00434421 | 0.166882124 | 3.13E-33 | 4.48E-29 |  | SAMD14 | 1.540579564 | 0.495567953 | 0.001879028 | 0.025011414 |  |  |  |  |  |  |
| C5orf46 | -1.652145265 | 0.36280161 | 5.27E-06 | 0.000446217 |  | PECAM1 | -1.039819543 | 0.459476503 | 0.023632441 | 0.157210905 |  |  |  |  |  |  |
| SPINK6 | -2.071775097 | 0.79707567 | 0.009343584 | 0.121713482 |  | SMIM5 | -1.538920052 | 0.334855293 | 4.31E-06 | 0.00018034 |  |  |  |  |  |  |
| CCDC69 | 1.343447322 | 0.419498062 | 0.001362349 | 0.033628883 |  | ZACN | 1.288052367 | 0.503836041 | 0.010573377 | 0.091595616 |  |  |  |  |  |  |
| TENM2 | -1.313016328 | 0.143086343 | 4.46E-20 | 9.12E-17 |  | COLEC12 | -1.105195091 | 0.131354749 | 3.97E-17 | 1.54E-14 |  |  |  |  |  |  |
| NEURL1B | 1.047661351 | 0.209476501 | 5.69E-07 | 7.36E-05 |  | ARHGAP28 | -1.255828588 | 0.301431456 | 3.10E-05 | 0.000946121 |  |  |  |  |  |  |
| NKX2-5 | 1.262487528 | 0.275393103 | 4.55E-06 | 0.000398435 |  | RNMT | -1.071195145 | 0.314232521 | 0.000652194 | 0.011444409 |  |  |  |  |  |  |
| BMP6 | -1.005488381 | 0.246149894 | 4.41E-05 | 0.002577235 |  | CABLES1 | -1.074677082 | 0.208171266 | 2.44E-07 | 1.50E-05 |  |  |  |  |  |  |
| POU5F1 | -1.30698277 | 0.591122591 | 0.027034581 | 0.231077073 |  | CRB3 | 2.243397804 | 0.566522766 | 7.50E-05 | 0.001950651 |  |  |  |  |  |  |
| PACSIN1 | 1.549758457 | 0.314237823 | 8.15E-07 | 0.000101433 |  | PDE4A | 1.103656564 | 0.198580563 | 2.73E-08 | 2.25E-06 |  |  |  |  |  |  |
| TAF11 | 1.485841387 | 0.186200648 | 1.47E-15 | 1.91E-12 |  | ZNF440 | 1.037589203 | 0.346670042 | 0.002762347 | 0.033798818 |  |  |  |  |  |  |
| LHFPL5 | -1.620534313 | 0.433585731 | 0.000185846 | 0.007779994 |  | GNG14 | 1.517358026 | 0.657837102 | 0.021077896 | 0.146357574 |  |  |  |  |  |  |
| RSPH9 | 1.023998779 | 0.379784675 | 0.00701226 | 0.101000534 |  | GRHL3 | 1.175138197 | 0.467254176 | 0.011903676 | 0.099064195 |  |  |  |  |  |  |
| ALX3 | 2.021441903 | 0.658617524 | 0.002146187 | 0.04606361 |  | UPK1A | 1.030719338 | 0.256013064 | 5.67E-05 | 0.001569256 |  |  |  |  |  |  |
| COX7A2 | 1.078703018 | 0.256271694 | 2.56E-05 | 0.001695107 |  | ZNF382 | -1.189147133 | 0.442530252 | 0.007206362 | 0.069779508 |  |  |  |  |  |  |
| IRAK1BP1 | -1.204904043 | 0.392545972 | 0.002144463 | 0.04606361 |  | SERTAD1 | 1.172066719 | 0.157180585 | 8.86E-14 | 2.09E-11 |  |  |  |  |  |  |
| PKIB;Z99129 | -1.398403959 | 0.508312779 | 0.005940098 | 0.090376597 |  | KLC3 | 1.071347885 | 0.204707939 | 1.66E-07 | 1.10E-05 |  |  |  |  |  |  |
| NKAIN2 | -6.037098858 | 1.8237357 | 0.000931985 | 0.025959584 |  | FOSB | 1.495667217 | 0.353998657 | 2.39E-05 | 0.000763807 |  |  |  |  |  |  |
| SLC2A12 | 1.298903241 | 0.534569623 | 0.015106691 | 0.165353591 |  | GPR3 | 1.52332316 | 0.249248433 | 9.86E-10 | 1.17E-07 |  |  |  |  |  |  |
| TTLL2 | -2.708131226 | 0.96700063 | 0.005101599 | 0.08187109 |  | FPR1 | -4.842117243 | 1.130425753 | 1.84E-05 | 0.000612935 |  |  |  |  |  |  |
| RAMACL | -2.346991982 | 0.606697009 | 0.000109518 | 0.005193595 |  | BRSK1 | 1.155624095 | 0.154000925 | 6.19E-14 | 1.51E-11 |  |  |  |  |  |  |
| THBS2 | -1.0889531 | 0.15994137 | 9.87E-12 | 5.89E-09 |  | IL11 | 1.537262694 | 0.237276599 | 9.25E-11 | 1.33E-08 |  |  |  |  |  |  |
| IGFBP3 | -1.08491345 | 0.277961201 | 9.50E-05 | 0.004720836 |  | SMPDL3B | 1.769399324 | 0.531991356 | 0.000881043 | 0.014292359 |  |  |  |  |  |  |
| FZD9 | 1.183246086 | 0.246148203 | 1.53E-06 | 0.000156943 |  | ATP6V1C2 | -2.77686626 | 0.839840986 | 0.000944966 | 0.015024444 |  |  |  |  |  |  |
| CLDN3 | 1.354412741 | 0.271924873 | 6.33E-07 | 8.09E-05 |  | GREB1 | 1.058244487 | 0.328490079 | 0.001275029 | 0.018933326 |  |  |  |  |  |  |
| GAL3ST4 | 1.08531386 | 0.462960003 | 0.019063193 | 0.189664858 |  | ACTG2 | -1.143377691 | 0.186801072 | 9.31E-10 | 1.12E-07 |  |  |  |  |  |  |
| ATP6V1FNB | 1.230622579 | 0.411915388 | 0.002812127 | 0.055152351 |  | TLX2 | 2.070241373 | 0.515359063 | 5.89E-05 | 0.001605746 |  |  |  |  |  |  |
| CPA4 | -1.182253059 | 0.172082525 | 6.41E-12 | 3.99E-09 |  | AC062037;SH2D6;Y_RNA | -1.148261802 | 0.300796423 | 0.000134863 | 0.00318121 |  |  |  |  |  |  |
| AKR1B10;AKR1B15 | -1.362249603 | 0.176255878 | 1.09E-14 | 1.20E-11 |  | LYPD1 | -1.183473968 | 0.151148125 | 4.88E-15 | 1.38E-12 |  |  |  |  |  |  |
| RAB19 | 6.019405284 | 2.24440632 | 0.007319247 | 0.103649519 |  | MCM6 | -1.450436716 | 0.128839307 | 2.12E-29 | 3.05E-26 |  |  |  |  |  |  |
| OR2A42 | -1.677479505 | 0.614492425 | 0.006336085 | 0.094101375 |  | DPP4 | -1.655627433 | 0.222851767 | 1.09E-13 | 2.49E-11 |  |  |  |  |  |  |
| NPM2 | 1.203124821 | 0.59673166 | 0.043780039 | 0.301780846 |  | AOX1 | -1.070879368 | 0.172948537 | 5.94E-10 | 7.50E-08 |  |  |  |  |  |  |
| EGR3 | 2.870697495 | 1.317395697 | 0.029326465 | 0.242697691 |  | NRP2 | -1.282531378 | 0.157172243 | 3.35E-16 | 1.18E-13 |  |  |  |  |  |  |
| PEBP4 | -5.938827588 | 1.873533021 | 0.001525151 | 0.036151644 |  | IGFBP5 | -2.020010772 | 0.105656777 | 1.77E-81 | 2.54E-77 |  |  |  |  |  |  |
| NKX2-6 | 1.238741336 | 0.562858963 | 0.027750018 | 0.234947967 |  | SLC11A1 | -1.102896813 | 0.344611356 | 0.001372333 | 0.020088002 |  |  |  |  |  |  |
| TRPA1 | -1.042570943 | 0.448512335 | 0.020098232 | 0.195479879 |  | TUBA4B | -6.092011293 | 2.248951323 | 0.006752233 | 0.066319374 |  |  |  |  |  |  |
| JPH1 | -1.78286739 | 0.557311987 | 0.001378826 | 0.033802476 |  | EPHA4 | -1.037225745 | 0.178974738 | 6.82E-09 | 6.91E-07 |  |  |  |  |  |  |
| CCNE2 | -1.640379198 | 0.233269586 | 2.03E-12 | 1.39E-09 |  | PID1 | -1.07860778 | 0.248270887 | 1.40E-05 | 0.000480573 |  |  |  |  |  |  |
| TNFRSF11B | -1.045741194 | 0.361578016 | 0.00382604 | 0.068046477 |  | UGT1A8;UGT1A10;UGT1A9;UGT1A7;UGT1A6;UGT1A5;UGT1A4;UGT1A3;UGT1A1 | -1.517280006 | 0.186928623 | 4.78E-16 | 1.50E-13 |  |  |  |  |  |  |
| SPINK4 | -1.275435893 | 0.429347967 | 0.002971852 | 0.057000895 |  | LZTS3 | 1.015410046 | 0.194142273 | 1.69E-07 | 1.11E-05 |  |  |  |  |  |  |
| ANKRD18B | -1.421471997 | 0.517973957 | 0.00606415 | 0.091582731 |  | HPCAL4 | 1.076919316 | 0.20997416 | 2.92E-07 | 1.77E-05 |  |  |  |  |  |  |
| GCNT1 | -1.456447269 | 0.436383895 | 0.000845246 | 0.02405841 |  | MFSD2A | 1.03204006 | 0.173202942 | 2.54E-09 | 2.84E-07 |  |  |  |  |  |  |
| TMOD1 | 2.421485748 | 0.682009029 | 0.000384473 | 0.013168659 |  | BPIFB4 | -1.697437308 | 0.223475698 | 3.06E-14 | 7.87E-12 |  |  |  |  |  |  |
| BRINP1 | -1.410889458 | 0.220025136 | 1.43E-10 | 7.32E-08 |  | BPIFA2 | -1.408670415 | 0.499427403 | 0.004793827 | 0.051012076 |  |  |  |  |  |  |
| LCE1F | 7.58090854 | 1.464261192 | 2.25E-07 | 3.58E-05 |  | BPIFA1 | -1.591029838 | 0.192985358 | 1.66E-16 | 5.98E-14 |  |  |  |  |  |  |
| LCN2 | -1.326877227 | 0.44217642 | 0.002692829 | 0.053845299 |  | BPIFB1 | -1.267076635 | 0.128816065 | 7.85E-23 | 5.65E-20 |  |  |  |  |  |  |
| NACC2 | 1.354021125 | 0.523582584 | 0.009707726 | 0.124316202 |  | TGM2 | -1.051651175 | 0.150519232 | 2.81E-12 | 4.76E-10 |  |  |  |  |  |  |
| SLC34A3 | 1.252135165 | 0.379131297 | 0.000957784 | 0.026375413 |  | CCN5 | -1.950359846 | 0.269835825 | 4.90E-13 | 9.80E-11 |  |  |  |  |  |  |
| KCNJ10 | 1.044566881 | 0.499704281 | 0.036584568 | 0.273944173 |  | PI3 | -1.000112191 | 0.421899053 | 0.017763989 | 0.131828172 |  |  |  |  |  |  |
| SLAMF7 | -1.659255243 | 0.301122814 | 3.58E-08 | 7.23E-06 |  | SLPI | -1.051280118 | 0.121047205 | 3.79E-18 | 1.76E-15 |  |  |  |  |  |  |
| ITLN2 | -1.900573125 | 0.258804261 | 2.08E-13 | 1.78E-10 |  | WFDC3 | -1.190061137 | 0.1657003 | 6.87E-13 | 1.30E-10 |  |  |  |  |  |  |
| NECTIN4 | 2.529503149 | 0.2462164 | 9.28E-25 | 3.32E-21 |  | EDN2 | -2.69544182 | 0.425678449 | 2.42E-10 | 3.31E-08 |  |  |  |  |  |  |
| ADAMTS4 | 1.178930882 | 0.400286821 | 0.0032273 | 0.060716491 |  | SULF2 | -1.193869307 | 0.144665937 | 1.55E-16 | 5.72E-14 |  |  |  |  |  |  |
| C1orf21 | -1.019268775 | 0.198340802 | 2.76E-07 | 4.21E-05 |  | PTGIS | -1.619153322 | 0.11521241 | 7.32E-45 | 2.63E-41 |  |  |  |  |  |  |
| BTG2 | 1.638806922 | 0.180916764 | 1.32E-19 | 2.37E-16 |  | CYP24A1 | -2.108891381 | 0.21158561 | 2.12E-23 | 1.80E-20 |  |  |  |  |  |  |
| G0S2 | -1.020494515 | 0.210909664 | 1.31E-06 | 0.000144048 |  | NKAIN4 | -2.435682855 | 0.577121442 | 2.44E-05 | 0.000776338 |  |  |  |  |  |  |
| MXRA5 | -1.261405714 | 0.131737843 | 1.02E-21 | 2.91E-18 |  | PTCH2;RNU5E-6P | 1.0265553 | 0.309525233 | 0.000911369 | 0.014554597 |  |  |  |  |  |  |
| CXCL12 | -1.456561442 | 0.132939365 | 6.18E-28 | 4.42E-24 |  | DERL3 | -1.32833218 | 0.285157964 | 3.19E-06 | 0.000142079 |  |  |  |  |  |  |
| DNAJC12 | -2.38823104 | 1.194087447 | 0.045495187 | 0.308833763 |  | MN1 | -1.442507919 | 0.154656532 | 1.09E-20 | 6.52E-18 |  |  |  |  |  |  |
| SCUBE2 | 1.301591398 | 0.596835671 | 0.029196704 | 0.242183786 |  | MCM5 | -1.164620516 | 0.15402944 | 4.00E-14 | 1.01E-11 |  |  |  |  |  |  |
| SAA4;SAA2-SAA4;SAA2;RNA5SP333 | -1.383994977 | 0.419028568 | 0.000957023 | 0.026375413 |  | MB | -1.152788969 | 0.252671885 | 5.06E-06 | 0.000206733 |  |  |  |  |  |  |
| FAM111B | -1.437549792 | 0.333825044 | 1.66E-05 | 0.001182471 |  | MAFF | 1.073072915 | 0.316071287 | 0.0006862 | 0.011866046 |  |  |  |  |  |  |
| GPRASP1 | -1.193295263 | 0.534495557 | 0.025577744 | 0.223815536 |  | ATF4 | 1.586145428 | 0.215814742 | 1.99E-13 | 4.34E-11 |  |  |  |  |  |  |
| PLEKHB1 | 1.499282621 | 0.338985053 | 9.74E-06 | 0.000733646 |  | TTC39A | 1.118596038 | 0.312420317 | 0.000343042 | 0.006789589 |  |  |  |  |  |  |
| ABCG4 | 1.229700126 | 0.302771778 | 4.88E-05 | 0.002759478 |  | ITGA9 | -2.187307353 | 1.115101839 | 0.049817057 | 0.254874234 |  |  |  |  |  |  |
| XIAP | 1.22683148 | 0.316744339 | 0.000107392 | 0.005142222 |  | CSRNP1 | 1.101914705 | 0.152264998 | 4.59E-13 | 9.31E-11 |  |  |  |  |  |  |
| IKZF4 | 1.131123563 | 0.291310478 | 0.000103227 | 0.00499289 |  | CAMKV | 1.027085415 | 0.470785134 | 0.02913584 | 0.179515577 |  |  |  |  |  |  |
| GLI1 | -1.004815221 | 0.304940993 | 0.000983819 | 0.02682921 |  | CACNA2D2 | 1.226867059 | 0.187811536 | 6.47E-11 | 9.60E-09 |  |  |  |  |  |  |
| ANKS1B | -1.80068543 | 0.68375238 | 0.008450127 | 0.114132517 |  | RPL29 | -1.564360778 | 0.49042272 | 0.001423609 | 0.020504808 |  |  |  |  |  |  |
| UNG | -1.218623026 | 0.135573593 | 2.50E-19 | 3.98E-16 |  | FHIT | 1.011641225 | 0.433059747 | 0.019489598 | 0.139572525 |  |  |  |  |  |  |
| RASAL1 | 1.161477608 | 0.337516067 | 0.00057903 | 0.017958616 |  | C3orf14 | -1.010282335 | 0.191670914 | 1.36E-07 | 9.08E-06 |  |  |  |  |  |  |
| TMEM120B | 1.19465158 | 0.5673114 | 0.035220621 | 0.268779684 |  | PCNP | -1.152044689 | 0.343856465 | 0.000807051 | 0.013347884 |  |  |  |  |  |  |
| ENOX1 | -1.076118471 | 0.207977106 | 2.29E-07 | 3.60E-05 |  | CCDC80 | -1.995206013 | 0.108574543 | 2.03E-75 | 1.46E-71 |  |  |  |  |  |  |
| HSFX2 | 1.146560396 | 0.576619685 | 0.046765588 | 0.312241756 |  | LSAMP | -1.182389684 | 0.459580518 | 0.010089158 | 0.088628141 |  |  |  |  |  |  |
| CHAMP1 | 2.169634522 | 0.234010644 | 1.84E-20 | 4.38E-17 |  | HACD2 | -1.164771078 | 0.324286543 | 0.000328407 | 0.00653589 |  |  |  |  |  |  |
| GABRQ | -1.140371603 | 0.152438874 | 7.38E-14 | 7.05E-11 |  | TM4SF1 | -1.239107593 | 0.12180599 | 2.62E-24 | 2.70E-21 |  |  |  |  |  |  |
|  |  |  |  |  |  | CP | -1.297513325 | 0.229165868 | 1.50E-08 | 1.36E-06 |  |  |  |  |  |  |
|  |  |  |  |  |  | ANKUB1;RNU6-507P;PFN2 | -1.144911672 | 0.259156529 | 9.97E-06 | 0.000365008 |  |  |  |  |  |  |
|  |  |  |  |  |  | LXN | -1.269594633 | 0.356233562 | 0.000365331 | 0.007181351 |  |  |  |  |  |  |
|  |  |  |  |  |  | RARRES1 | -1.741602296 | 0.220745404 | 3.03E-15 | 8.72E-13 |  |  |  |  |  |  |
|  |  |  |  |  |  | CLDN11;AC026316;SLC7A14-AS1 | -1.221033453 | 0.301499707 | 5.12E-05 | 0.001440219 |  |  |  |  |  |  |
|  |  |  |  |  |  | TNFSF10 | -1.009324865 | 0.481914149 | 0.036223648 | 0.207440245 |  |  |  |  |  |  |
|  |  |  |  |  |  | NFIA | -1.169413927 | 0.268454544 | 1.32E-05 | 0.000460178 |  |  |  |  |  |  |
|  |  |  |  |  |  | KANK4 | -1.640885434 | 0.164796688 | 2.35E-23 | 1.88E-20 |  |  |  |  |  |  |
|  |  |  |  |  |  | DOK7 | 1.235035851 | 0.57520059 | 0.031782185 | 0.18983556 |  |  |  |  |  |  |
|  |  |  |  |  |  | MSX1 | 1.012426988 | 0.393590353 | 0.010102937 | 0.088640951 |  |  |  |  |  |  |
|  |  |  |  |  |  | LNX1 | 4.271813343 | 1.339765509 | 0.001430237 | 0.020579682 |  |  |  |  |  |  |
|  |  |  |  |  |  | AREG | 2.46215455 | 0.949233445 | 0.009491214 | 0.085324403 |  |  |  |  |  |  |
|  |  |  |  |  |  | DIRAS3 | -1.212146568 | 0.252188734 | 1.54E-06 | 7.49E-05 |  |  |  |  |  |  |
|  |  |  |  |  |  | DDIT4L | -1.798291684 | 0.370422459 | 1.21E-06 | 6.07E-05 |  |  |  |  |  |  |
|  |  |  |  |  |  | HHIP | -1.0254928 | 0.4103452 | 0.012450993 | 0.102319229 |  |  |  |  |  |  |
|  |  |  |  |  |  | FGB | -2.175105772 | 0.267116294 | 3.86E-16 | 1.29E-13 |  |  |  |  |  |  |
|  |  |  |  |  |  | FGG | -1.905064137 | 0.354203639 | 7.51E-08 | 5.46E-06 |  |  |  |  |  |  |
|  |  |  |  |  |  | GASK1B | -2.38697143 | 0.277239995 | 7.32E-18 | 3.29E-15 |  |  |  |  |  |  |
|  |  |  |  |  |  | ZDHHC11B;BRD9P2;AC026740 | 1.947511352 | 0.843611432 | 0.02096908 | 0.145985526 |  |  |  |  |  |  |
|  |  |  |  |  |  | SEMA5A | -1.031196333 | 0.146555216 | 1.98E-12 | 3.51E-10 |  |  |  |  |  |  |
|  |  |  |  |  |  | ADGRL2 | -1.111514834 | 0.251978284 | 1.03E-05 | 0.000374557 |  |  |  |  |  |  |
|  |  |  |  |  |  | RASGRF2 | -1.090896612 | 0.42024246 | 0.009435057 | 0.085063304 |  |  |  |  |  |  |
|  |  |  |  |  |  | NR2F1 | -1.211251878 | 0.262962828 | 4.10E-06 | 0.000173945 |  |  |  |  |  |  |
|  |  |  |  |  |  | EPB41L4A | -1.024681993 | 0.277729145 | 0.000224694 | 0.004876509 |  |  |  |  |  |  |
|  |  |  |  |  |  | TGFBR3 | -1.035370602 | 0.167990792 | 7.13E-10 | 8.82E-08 |  |  |  |  |  |  |
|  |  |  |  |  |  | EGR1 | 2.551878579 | 0.191211498 | 1.25E-40 | 3.60E-37 |  |  |  |  |  |  |
|  |  |  |  |  |  | HBEGF | 1.266986305 | 0.214040716 | 3.23E-09 | 3.52E-07 |  |  |  |  |  |  |
|  |  |  |  |  |  | PPP2R2B;RNA5SP196 | -1.064014159 | 0.144654735 | 1.90E-13 | 4.21E-11 |  |  |  |  |  |  |
|  |  |  |  |  |  | C5orf46 | -1.635133329 | 0.41163074 | 7.12E-05 | 0.001872224 |  |  |  |  |  |  |
|  |  |  |  |  |  | AC008676;FNDC9;AC016571 | 1.978470025 | 0.75921995 | 0.00916266 | 0.083496844 |  |  |  |  |  |  |
|  |  |  |  |  |  | ADAM19 | -1.265517869 | 0.218846966 | 7.35E-09 | 7.40E-07 |  |  |  |  |  |  |
|  |  |  |  |  |  | TENM2 | -1.435297696 | 0.121583386 | 3.68E-32 | 6.61E-29 |  |  |  |  |  |  |
|  |  |  |  |  |  | NEURL1B | 1.025114092 | 0.272580765 | 0.00016939 | 0.003862678 |  |  |  |  |  |  |
|  |  |  |  |  |  | SCGB3A1 | -3.197691487 | 1.351957073 | 0.018018803 | 0.133040489 |  |  |  |  |  |  |
|  |  |  |  |  |  | FOXQ1 | -1.023049971 | 0.259726579 | 8.18E-05 | 0.00209162 |  |  |  |  |  |  |
|  |  |  |  |  |  | NEDD9 | -1.006516423 | 0.179230578 | 1.96E-08 | 1.70E-06 |  |  |  |  |  |  |
|  |  |  |  |  |  | GFOD1 | -1.004206764 | 0.123408953 | 4.04E-16 | 1.32E-13 |  |  |  |  |  |  |
|  |  |  |  |  |  | TRIM31 | -1.349189364 | 0.283124208 | 1.89E-06 | 8.86E-05 |  |  |  |  |  |  |
|  |  |  |  |  |  | PACSIN1 | 1.253336688 | 0.309045954 | 5.00E-05 | 0.00141421 |  |  |  |  |  |  |
|  |  |  |  |  |  | TAF11 | 1.02044673 | 0.362308 | 0.004854744 | 0.051515417 |  |  |  |  |  |  |
|  |  |  |  |  |  | ALX3 | 1.780026789 | 0.641785159 | 0.005544737 | 0.056988018 |  |  |  |  |  |  |
|  |  |  |  |  |  | TNFRSF21 | -1.030918988 | 0.138130065 | 8.43E-14 | 2.02E-11 |  |  |  |  |  |  |
|  |  |  |  |  |  | POPDC3 | -1.423940904 | 0.691307077 | 0.03941952 | 0.219337771 |  |  |  |  |  |  |
|  |  |  |  |  |  | CD24 | -1.104049256 | 0.154436095 | 8.75E-13 | 1.61E-10 |  |  |  |  |  |  |
|  |  |  |  |  |  | SLC35F1 | -1.708826491 | 0.617884083 | 0.005681641 | 0.057980948 |  |  |  |  |  |  |
|  |  |  |  |  |  | FAM184A | 1.239283057 | 0.581520927 | 0.033080365 | 0.194919482 |  |  |  |  |  |  |
|  |  |  |  |  |  | MAN1A1 | -1.07073409 | 0.180988184 | 3.30E-09 | 3.56E-07 |  |  |  |  |  |  |
|  |  |  |  |  |  | PKIB;Z99129 | -1.373152663 | 0.429577447 | 0.001390965 | 0.02025768 |  |  |  |  |  |  |
|  |  |  |  |  |  | NKAIN2 | -3.373410548 | 1.529824076 | 0.027447285 | 0.172613195 |  |  |  |  |  |  |
|  |  |  |  |  |  | SLC2A12 | 1.410426127 | 0.610629435 | 0.02089975 | 0.145842145 |  |  |  |  |  |  |
|  |  |  |  |  |  | LFNG | -1.048993417 | 0.356896471 | 0.003290508 | 0.039000924 |  |  |  |  |  |  |
|  |  |  |  |  |  | AGR2 | -1.18161912 | 0.436834469 | 0.006831292 | 0.066913178 |  |  |  |  |  |  |
|  |  |  |  |  |  | CREB5 | 1.58036346 | 0.277340855 | 1.21E-08 | 1.15E-06 |  |  |  |  |  |  |
|  |  |  |  |  |  | JAZF1 | -1.007162793 | 0.310461863 | 0.001178311 | 0.017903606 |  |  |  |  |  |  |
|  |  |  |  |  |  | ELMO1 | -1.251537444 | 0.168105204 | 9.70E-14 | 2.25E-11 |  |  |  |  |  |  |
|  |  |  |  |  |  | SFRP4 | -1.148940969 | 0.532904405 | 0.031083801 | 0.18714009 |  |  |  |  |  |  |
|  |  |  |  |  |  | IGFBP3 | -1.47865424 | 0.262885363 | 1.86E-08 | 1.64E-06 |  |  |  |  |  |  |
|  |  |  |  |  |  | FZD9 | 1.129010877 | 0.235750409 | 1.68E-06 | 8.01E-05 |  |  |  |  |  |  |
|  |  |  |  |  |  | FBXO24 | -1.065233763 | 0.406935876 | 0.008852605 | 0.081445096 |  |  |  |  |  |  |
|  |  |  |  |  |  | CPA4 | -1.634556565 | 0.166905017 | 1.20E-22 | 8.24E-20 |  |  |  |  |  |  |
|  |  |  |  |  |  | AKR1B10;AKR1B15 | -2.140828549 | 0.177564083 | 1.79E-33 | 3.68E-30 |  |  |  |  |  |  |
|  |  |  |  |  |  | PRSS2;PRSS3P1 | -1.147354514 | 0.397980127 | 0.003939772 | 0.044600191 |  |  |  |  |  |  |
|  |  |  |  |  |  | GFRA2 | -1.062002181 | 0.268073269 | 7.44E-05 | 0.001947631 |  |  |  |  |  |  |
|  |  |  |  |  |  | NPM2 | 1.178877694 | 0.5435032 | 0.030079994 | 0.182792965 |  |  |  |  |  |  |
|  |  |  |  |  |  | EGR3 | 3.842259886 | 1.100591969 | 0.000481064 | 0.008989641 |  |  |  |  |  |  |
|  |  |  |  |  |  | NKX2-6 | 1.118012426 | 0.463541358 | 0.015869913 | 0.121334844 |  |  |  |  |  |  |
|  |  |  |  |  |  | UNC5D | -2.077437072 | 0.957430088 | 0.030021583 | 0.182792965 |  |  |  |  |  |  |
|  |  |  |  |  |  | MSC | -1.127776814 | 0.15505346 | 3.50E-13 | 7.31E-11 |  |  |  |  |  |  |
|  |  |  |  |  |  | SBSPON | -1.288256646 | 0.24563211 | 1.57E-07 | 1.04E-05 |  |  |  |  |  |  |
|  |  |  |  |  |  | RDH10 | -1.079109172 | 0.15017791 | 6.69E-13 | 1.28E-10 |  |  |  |  |  |  |
|  |  |  |  |  |  | JPH1 | -1.170137423 | 0.469353502 | 0.01266391 | 0.103475865 |  |  |  |  |  |  |
|  |  |  |  |  |  | CHMP4C | 1.17800541 | 0.442622022 | 0.007781062 | 0.074245164 |  |  |  |  |  |  |
|  |  |  |  |  |  | CCNE2 | -1.135565459 | 0.23651931 | 1.58E-06 | 7.67E-05 |  |  |  |  |  |  |
|  |  |  |  |  |  | TNFRSF11B | -1.21619825 | 0.363741036 | 0.00082704 | 0.013569307 |  |  |  |  |  |  |
|  |  |  |  |  |  | FBXO32 | -1.436576163 | 0.167638667 | 1.04E-17 | 4.53E-15 |  |  |  |  |  |  |
|  |  |  |  |  |  | ST3GAL1 | -1.097529476 | 0.130761065 | 4.72E-17 | 1.79E-14 |  |  |  |  |  |  |
|  |  |  |  |  |  | PSCA | -1.016121217 | 0.223532929 | 5.47E-06 | 0.000220032 |  |  |  |  |  |  |
|  |  |  |  |  |  | PTPRD | -3.336680585 | 1.527122661 | 0.028892805 | 0.17850518 |  |  |  |  |  |  |
|  |  |  |  |  |  | SPINK4 | -2.702516101 | 0.550717217 | 9.24E-07 | 4.76E-05 |  |  |  |  |  |  |
|  |  |  |  |  |  | AQP3 | -1.646409539 | 0.20413993 | 7.32E-16 | 2.19E-13 |  |  |  |  |  |  |
|  |  |  |  |  |  | GCNT1 | -1.616323603 | 0.441565268 | 0.000251782 | 0.005305367 |  |  |  |  |  |  |
|  |  |  |  |  |  | GAS1 | -1.615733932 | 0.185972297 | 3.69E-18 | 1.76E-15 |  |  |  |  |  |  |
|  |  |  |  |  |  | PTCH1 | -1.206275829 | 0.150901545 | 1.31E-15 | 3.84E-13 |  |  |  |  |  |  |
|  |  |  |  |  |  | TMOD1 | 2.038219323 | 0.617426993 | 0.000962893 | 0.015258881 |  |  |  |  |  |  |
|  |  |  |  |  |  | TNC | -1.100474754 | 0.120243445 | 5.59E-20 | 3.09E-17 |  |  |  |  |  |  |
|  |  |  |  |  |  | BRINP1 | -1.786216786 | 0.184464909 | 3.55E-22 | 2.32E-19 |  |  |  |  |  |  |
|  |  |  |  |  |  | PAPPA | -1.000020998 | 0.199951162 | 5.69E-07 | 3.21E-05 |  |  |  |  |  |  |
|  |  |  |  |  |  | LCE1F | 6.791772598 | 1.591333921 | 1.97E-05 | 0.000648017 |  |  |  |  |  |  |
|  |  |  |  |  |  | S100A9 | -1.171115372 | 0.267154831 | 1.17E-05 | 0.000415653 |  |  |  |  |  |  |
|  |  |  |  |  |  | CFAP77 | 1.546332075 | 0.632322603 | 0.01446596 | 0.113495474 |  |  |  |  |  |  |
|  |  |  |  |  |  | NACC2 | 1.628275059 | 0.165456305 | 7.49E-23 | 5.65E-20 |  |  |  |  |  |  |
|  |  |  |  |  |  | SLAMF7 | -1.899027616 | 0.175739714 | 3.23E-27 | 3.87E-24 |  |  |  |  |  |  |
|  |  |  |  |  |  | ITLN2 | -2.275925834 | 0.423610127 | 7.76E-08 | 5.55E-06 |  |  |  |  |  |  |
|  |  |  |  |  |  | NECTIN4 | 1.853644878 | 0.262828701 | 1.76E-12 | 3.16E-10 |  |  |  |  |  |  |
|  |  |  |  |  |  | ADAMTS4 | 1.203261355 | 0.38372469 | 0.001714203 | 0.023626124 |  |  |  |  |  |  |
|  |  |  |  |  |  | C1orf21 | -1.028555365 | 0.158437923 | 8.48E-11 | 1.23E-08 |  |  |  |  |  |  |
|  |  |  |  |  |  | ELF3;AL691482 | -1.026132071 | 0.125990223 | 3.81E-16 | 1.29E-13 |  |  |  |  |  |  |
|  |  |  |  |  |  | BTG2 | 1.390903913 | 0.137739704 | 5.63E-24 | 5.07E-21 |  |  |  |  |  |  |
|  |  |  |  |  |  | CHI3L1 | -1.571060701 | 0.153868258 | 1.78E-24 | 1.97E-21 |  |  |  |  |  |  |
|  |  |  |  |  |  | PLEKHA6 | -1.167630996 | 0.136724802 | 1.34E-17 | 5.68E-15 |  |  |  |  |  |  |
|  |  |  |  |  |  | SLC45A3 | 1.009568308 | 0.162309802 | 4.97E-10 | 6.44E-08 |  |  |  |  |  |  |
|  |  |  |  |  |  | G0S2 | -1.383547544 | 0.202889257 | 9.15E-12 | 1.48E-09 |  |  |  |  |  |  |
|  |  |  |  |  |  | TRAF3IP3 | -1.830960662 | 0.782971581 | 0.019362542 | 0.138956418 |  |  |  |  |  |  |
|  |  |  |  |  |  | MXRA5 | -1.506673448 | 0.119485129 | 1.87E-36 | 4.48E-33 |  |  |  |  |  |  |
|  |  |  |  |  |  | AKR1C1 | -1.487203725 | 0.164884145 | 1.89E-19 | 1.01E-16 |  |  |  |  |  |  |
|  |  |  |  |  |  | CXCL12 | -2.307876587 | 0.140156074 | 6.39E-61 | 3.06E-57 |  |  |  |  |  |  |
|  |  |  |  |  |  | ARID5B | -1.163762861 | 0.194800882 | 2.31E-09 | 2.60E-07 |  |  |  |  |  |  |
|  |  |  |  |  |  | EGR2 | -1.162438389 | 0.354673045 | 0.001047334 | 0.016277999 |  |  |  |  |  |  |
|  |  |  |  |  |  | ACADSB | -1.080925774 | 0.38142826 | 0.004598514 | 0.049713013 |  |  |  |  |  |  |
|  |  |  |  |  |  | DUSP8 | 1.474414223 | 0.203672396 | 4.52E-13 | 9.28E-11 |  |  |  |  |  |  |
|  |  |  |  |  |  | SCUBE2 | 1.650127975 | 0.541775977 | 0.002320811 | 0.029578518 |  |  |  |  |  |  |
|  |  |  |  |  |  | SAA4;SAA2-SAA4;SAA2;RNA5SP333 | -1.601947187 | 0.352862936 | 5.63E-06 | 0.000225625 |  |  |  |  |  |  |
|  |  |  |  |  |  | SAA1;RNA5SP334 | -1.435982025 | 0.373264821 | 0.000119531 | 0.002887981 |  |  |  |  |  |  |
|  |  |  |  |  |  | TMEM35A | 1.196769514 | 0.464227547 | 0.009937964 | 0.08779057 |  |  |  |  |  |  |
|  |  |  |  |  |  | PLEKHB1 | 1.307624788 | 0.331870681 | 8.14E-05 | 0.002084768 |  |  |  |  |  |  |
|  |  |  |  |  |  | ABCG4 | 1.626196995 | 0.254722377 | 1.72E-10 | 2.41E-08 |  |  |  |  |  |  |
|  |  |  |  |  |  | ADAMTS15 | -1.385787449 | 0.151301023 | 5.23E-20 | 3.01E-17 |  |  |  |  |  |  |
|  |  |  |  |  |  | MGST1 | -1.168180794 | 0.318683305 | 0.000246713 | 0.005243657 |  |  |  |  |  |  |
|  |  |  |  |  |  | RESF1 | -2.086270563 | 0.365473121 | 1.14E-08 | 1.09E-06 |  |  |  |  |  |  |
|  |  |  |  |  |  | PCED1B | -1.09825503 | 0.382695306 | 0.004107449 | 0.045886715 |  |  |  |  |  |  |
|  |  |  |  |  |  | SMIM41;OR7E47P | 3.268105182 | 1.602937971 | 0.041467797 | 0.226444072 |  |  |  |  |  |  |
|  |  |  |  |  |  | KRT87P;KRT81 | -1.234707511 | 0.171267902 | 5.63E-13 | 1.11E-10 |  |  |  |  |  |  |
|  |  |  |  |  |  | SP7 | -1.502681076 | 0.674156316 | 0.025815223 | 0.165446347 |  |  |  |  |  |  |
|  |  |  |  |  |  | XIAP | 1.104060674 | 0.347311545 | 0.001478468 | 0.021125799 |  |  |  |  |  |  |
|  |  |  |  |  |  | NFE2 | -1.170027158 | 0.3144188 | 0.000198249 | 0.004402158 |  |  |  |  |  |  |
|  |  |  |  |  |  | INHBE | -1.02839856 | 0.202501361 | 3.80E-07 | 2.22E-05 |  |  |  |  |  |  |
|  |  |  |  |  |  | GLI1 | -1.279313208 | 0.345801698 | 0.000215976 | 0.004722912 |  |  |  |  |  |  |
|  |  |  |  |  |  | PPM1H | -1.031212612 | 0.19066357 | 6.35E-08 | 4.76E-06 |  |  |  |  |  |  |
|  |  |  |  |  |  | SELPLG | -1.022325863 | 0.424963124 | 0.016142338 | 0.122571027 |  |  |  |  |  |  |
|  |  |  |  |  |  | UNG | -1.333730515 | 0.118394515 | 1.95E-29 | 3.05E-26 |  |  |  |  |  |  |
|  |  |  |  |  |  | LRRC43 | 1.139951533 | 0.438404205 | 0.009316144 | 0.084156801 |  |  |  |  |  |  |
|  |  |  |  |  |  | RASL11A | -1.30596844 | 0.234229932 | 2.47E-08 | 2.05E-06 |  |  |  |  |  |  |
|  |  |  |  |  |  | LACC1;AL512506;NRAD1 | -1.010243348 | 0.324021798 | 0.001821908 | 0.024469018 |  |  |  |  |  |  |
|  |  |  |  |  |  | TBC1D4 | -1.051285675 | 0.29744869 | 0.00040879 | 0.007853249 |  |  |  |  |  |  |
|  |  |  |  |  |  | RNF113B | -3.364400842 | 1.509735101 | 0.025849125 | 0.165448214 |  |  |  |  |  |  |
|  |  |  |  |  |  | HSFX3 | -3.015226969 | 1.279210999 | 0.018418336 | 0.134733824 |  |  |  |  |  |  |
|  |  |  |  |  |  | CHAMP1 | 1.462317718 | 0.346988857 | 2.51E-05 | 0.00079233 |  |  |  |  |  |  |
|  |  |  |  |  |  | GABRQ | -1.325097939 | 0.118985902 | 8.32E-29 | 1.09E-25 |  |  |  |  |  |  |

**Identification of DECs:**

| 2Gy vs 0Gy | | | | |  | 4Gy vs 0Gy | | | | |  | 4Gy vs 2Gy | | | | |
| --- | --- | --- | --- | --- | --- | --- | --- | --- | --- | --- | --- | --- | --- | --- | --- | --- |
| circRNAs | logFC | lfcSE | pvalue | padj |  | circRNAs | logFC | lfcSE | pvalue | padj |  | circRNAs | logFC | lfcSE | pvalue | padj |
| ciRNA1960 | 8.38480566 | 3.90818129 | 0.03191692 | 0.99968986 |  | ciRNA111 | -1.5665682 | 0.62103117 | 0.01165149 | 0.99923803 |  | ciRNA1904 | -2.4473733 | 1.15112733 | 0.03349772 | 0.99965597 |
| ciRNA3190 | -4.8623622 | 1.80010687 | 0.00690998 | 0.99968986 |  | ciRNA129 | -1.2750663 | 0.57773914 | 0.02731455 | 0.99923803 |  | ciRNA1993 | -11.472019 | 3.90693501 | 0.00332129 | 0.99965597 |
| ciRNA3309 | -4.496038 | 2.13390175 | 0.03512136 | 0.99968986 |  | ciRNA155 | -1.5861096 | 0.71288503 | 0.02608685 | 0.99923803 |  | ciRNA3331 | -4.5002665 | 1.99600894 | 0.02415641 | 0.99965597 |
| ciRNA3331 | -4.5256171 | 1.95443861 | 0.02058238 | 0.99968986 |  | ciRNA1960 | -8.4639107 | 3.9081795 | 0.03033478 | 0.99923803 |  | ciRNA388 | 1.6914498 | 0.85251245 | 0.04724733 | 0.99965597 |
| ciRNA598 | 3.37521652 | 1.39834297 | 0.01579034 | 0.99968986 |  | ciRNA491 | -2.617849 | 0.73526416 | 0.00037026 | 0.35461885 |  | ciRNA491 | -1.7303991 | 0.85700722 | 0.04347491 | 0.99965597 |
| ciRNA966 | 4.30376698 | 2.04897887 | 0.03568973 | 0.99968986 |  | ciRNA598 | -2.490487 | 1.14706453 | 0.02991734 | 0.99923803 |  | ciRNA929 | 3.21004794 | 1.45404508 | 0.02726747 | 0.99965597 |
| ciRNA967 | -2.0539212 | 1.0391643 | 0.04809677 | 0.99968986 |  | ciRNA689 | -3.7197568 | 1.34278412 | 0.00560249 | 0.99923803 |  | circRNA10638 | -4.4275864 | 2.22741905 | 0.04683765 | 0.99965597 |
| circRNA10833 | 4.66142729 | 2.02659486 | 0.02144098 | 0.99968986 |  | ciRNA751 | -4.5051778 | 1.47957112 | 0.00232741 | 0.99923803 |  | circRNA10824 | -4.6821559 | 2.02261154 | 0.02061807 | 0.99965597 |
| circRNA10839 | 4.40519794 | 2.16962097 | 0.04231592 | 0.99968986 |  | circRNA10833 | -4.7379026 | 1.98800348 | 0.01716069 | 0.99923803 |  | circRNA10829 | 4.53211243 | 1.95519631 | 0.02045023 | 0.99965597 |
| circRNA1086 | -2.0399077 | 1.02309539 | 0.0461675 | 0.99968986 |  | circRNA10839 | -4.4856779 | 2.17969106 | 0.0395957 | 0.99923803 |  | circRNA10954 | -4.6911542 | 2.00901777 | 0.01954088 | 0.99965597 |
| circRNA11134 | 4.38657544 | 2.18943647 | 0.04512171 | 0.99968986 |  | circRNA11134 | -4.469154 | 2.19948797 | 0.04216312 | 0.99923803 |  | circRNA11262 | 5.37674642 | 1.54276285 | 0.00049188 | 0.64304764 |
| circRNA11262 | 4.53057871 | 2.09012258 | 0.03018808 | 0.99968986 |  | circRNA11297 | -4.6677883 | 2.06654137 | 0.0238993 | 0.99923803 |  | circRNA11366 | -4.7496093 | 1.97775248 | 0.01632718 | 0.99965597 |
| circRNA11432 | 4.59829287 | 2.06775665 | 0.02616139 | 0.99968986 |  | circRNA11432 | -4.6822066 | 2.04172228 | 0.02183286 | 0.99923803 |  | circRNA1190 | -1.954153 | 0.79994381 | 0.01457128 | 0.99965597 |
| circRNA14244 | 4.6476549 | 2.27533813 | 0.04108991 | 0.99968986 |  | circRNA14244 | -4.7140884 | 2.24478985 | 0.03572768 | 0.99923803 |  | circRNA14128 | 4.70549962 | 2.00694019 | 0.0190468 | 0.99965597 |
| circRNA15422 | -4.3545581 | 2.07778096 | 0.03610229 | 0.99968986 |  | circRNA17197 | 4.64005935 | 1.84057963 | 0.01170294 | 0.99923803 |  | circRNA14281 | 4.42912875 | 2.0200644 | 0.02833851 | 0.99965597 |
| circRNA16162 | -4.4109482 | 2.18391552 | 0.04341005 | 0.99968986 |  | circRNA17259 | 4.95284252 | 1.68935308 | 0.00337006 | 0.99923803 |  | circRNA17152 | -4.4127104 | 2.04820129 | 0.03120631 | 0.99965597 |
| circRNA17144 | -4.3016758 | 2.09158488 | 0.03971909 | 0.99968986 |  | circRNA17341 | 4.55566415 | 2.09216589 | 0.02944425 | 0.99923803 |  | circRNA17429 | -5.0296132 | 1.65828101 | 0.00242113 | 0.99965597 |
| circRNA17152 | -4.4447279 | 1.98488929 | 0.02513754 | 0.99968986 |  | circRNA1742 | 2.67021214 | 1.33217129 | 0.04502659 | 0.99923803 |  | circRNA25017 | 4.58263211 | 1.92475289 | 0.01727069 | 0.99965597 |
| circRNA17156 | -4.5642045 | 1.92333458 | 0.017641 | 0.99968986 |  | circRNA17603 | 5.43628018 | 1.49529882 | 0.00027735 | 0.35418193 |  | circRNA25049 | 4.30320644 | 2.11871402 | 0.04225029 | 0.99965597 |
| circRNA17188 | -4.7401661 | 2.00330437 | 0.01797301 | 0.99968986 |  | circRNA17653 | 4.3909219 | 2.01536165 | 0.02935199 | 0.99923803 |  | circRNA5631 | 4.78681328 | 1.78129003 | 0.0072038 | 0.99965597 |
| circRNA17206 | -4.4921305 | 1.94269248 | 0.02075995 | 0.99968986 |  | circRNA20693 | 4.59022364 | 2.06692794 | 0.02636484 | 0.99923803 |  | circRNA5656 | -3.2324572 | 1.50035526 | 0.03120402 | 0.99965597 |
| circRNA17249 | -4.6906349 | 1.84104902 | 0.01084029 | 0.99968986 |  | circRNA25017 | 4.53958966 | 1.92906013 | 0.01860937 | 0.99923803 |  | circRNA5696 | 4.44983101 | 2.01920999 | 0.02754204 | 0.99965597 |
| circRNA17341 | -4.9101252 | 1.75078678 | 0.00503908 | 0.99968986 |  | circRNA25049 | 4.25224625 | 2.12176757 | 0.04505875 | 0.99923803 |  | circRNA5701 | 4.70843342 | 1.99663415 | 0.01836452 | 0.99965597 |
| circRNA17429 | -5.0563265 | 1.67491908 | 0.00253738 | 0.99968986 |  | circRNA4563 | -4.4815388 | 1.9851121 | 0.02397219 | 0.99923803 |  | circRNA5864 | -4.7005303 | 2.01007958 | 0.01936238 | 0.99965597 |
| circRNA17553 | -4.4156992 | 2.18664602 | 0.04344631 | 0.99968986 |  | circRNA4993 | -3.6530209 | 1.7801007 | 0.04015578 | 0.99923803 |  | circRNA6002 | -5.0370708 | 1.66435832 | 0.00247457 | 0.99965597 |
| circRNA20560 | -4.5688004 | 2.33104043 | 0.04999774 | 0.99968986 |  | circRNA5551 | -4.8396362 | 1.92551616 | 0.01195659 | 0.99923803 |  | circRNA6291 | 4.411554 | 2.04981997 | 0.03138424 | 0.99965597 |
| circRNA22785 | -4.6103566 | 2.30588063 | 0.04556608 | 0.99968986 |  | circRNA5568 | -4.4268582 | 2.23224091 | 0.0473512 | 0.99923803 |  | circRNA6390 | -7.5628019 | 1.2435316 | 1.19E-09 | 4.66E-06 |
| circRNA5567 | 4.43592611 | 1.97684861 | 0.02483638 | 0.99968986 |  | circRNA568 | -5.0962358 | 1.63550533 | 0.00183322 | 0.99923803 |  | circRNA6409 | -4.4407032 | 2.01075794 | 0.02721137 | 0.99965597 |
| circRNA5568 | 4.36257091 | 2.2067568 | 0.04805122 | 0.99968986 |  | circRNA5785 | -4.6391962 | 2.08733189 | 0.02624626 | 0.99923803 |  | circRNA6489 | 4.52775165 | 2.16119316 | 0.03616885 | 0.99965597 |
| circRNA5740 | 4.83694794 | 1.79527768 | 0.00705447 | 0.99968986 |  | circRNA6003 | -4.5764482 | 1.93393418 | 0.01796237 | 0.99923803 |  | circRNA7079 | -4.575192 | 1.91145322 | 0.01668542 | 0.99965597 |
| circRNA5767 | 4.42634543 | 1.99222013 | 0.02629578 | 0.99968986 |  | circRNA6007 | 1.85701528 | 0.94512676 | 0.04943369 | 0.99923803 |  | hsa_circ_0001513 | 3.6904094 | 1.85660621 | 0.0468429 | 0.99965597 |
| circRNA5785 | 4.55483139 | 2.10278314 | 0.03030381 | 0.99968986 |  | circRNA6052 | -4.3741326 | 2.06381008 | 0.03405285 | 0.99923803 |  | hsa_circ_0001524 | -5.0577105 | 1.69195094 | 0.00279638 | 0.99965597 |
| circRNA6089 | 4.63308827 | 1.86457502 | 0.01296258 | 0.99968986 |  | circRNA6089 | -4.7027535 | 1.84072184 | 0.0106236 | 0.99923803 |  | hsa_circ_0001558 | 5.89142563 | 1.42112437 | 3.39E-05 | 0.06646066 |
| circRNA6095 | 4.84285217 | 1.7746319 | 0.00635395 | 0.99968986 |  | circRNA6143 | -4.3689063 | 2.08997594 | 0.036581 | 0.99923803 |  | hsa_circ_0003979 | -2.3040589 | 1.01000539 | 0.02253459 | 0.99965597 |
| circRNA6143 | 4.30203991 | 2.07254595 | 0.03791919 | 0.99968986 |  | circRNA6147 | -3.0838132 | 1.51921578 | 0.04236958 | 0.99923803 |  | hsa_circ_0007001 | 1.32434891 | 0.63862007 | 0.038101 | 0.99965597 |
| circRNA6255 | 4.36706188 | 2.04775891 | 0.0329571 | 0.99968986 |  | circRNA6279 | -4.4654615 | 2.01015029 | 0.02632005 | 0.99923803 |  | hsa_circ_0007332 | -1.0197643 | 0.51915503 | 0.04949798 | 0.99965597 |
| circRNA6287 | 4.49142276 | 2.12396408 | 0.03446051 | 0.99968986 |  | circRNA6301 | -4.3794119 | 2.07425882 | 0.03474532 | 0.99923803 |  | hsa_circ_0007360 | 4.3069446 | 2.13334463 | 0.04350078 | 0.99965597 |
| circRNA6300 | 3.17233384 | 1.52995667 | 0.03812767 | 0.99968986 |  | circRNA6319 | -4.6837499 | 1.86424564 | 0.01199096 | 0.99923803 |  | hsa_circ_0007578 | 2.97125016 | 1.21679855 | 0.01461186 | 0.99965597 |
| circRNA6319 | 4.6051519 | 1.88661469 | 0.01464826 | 0.99968986 |  | circRNA6390 | -7.6114695 | 1.25730617 | 1.41E-09 | 5.42E-06 |  | hsa_circ_0008225 | -4.4736676 | 2.03816694 | 0.02816743 | 0.99965597 |
| circRNA6359 | 4.54223467 | 1.90436393 | 0.01707116 | 0.99968986 |  | circRNA6404 | -4.5912898 | 1.90698515 | 0.01605702 | 0.99923803 |  | hsa_circ_0008433 | 2.1890198 | 0.98147903 | 0.0257257 | 0.99965597 |
| circRNA6400 | 4.36257091 | 2.2067568 | 0.04805122 | 0.99968986 |  | circRNA6413 | -5.2294467 | 1.5631952 | 0.00082177 | 0.62963705 |  | hsa_circ_0009095 | 1.82800814 | 0.79931235 | 0.02219723 | 0.99965597 |
| circRNA6404 | 4.51851441 | 1.9109509 | 0.01805262 | 0.99968986 |  | circRNA6429 | -1.8425042 | 0.72921487 | 0.01151411 | 0.99923803 |  | hsa_circ_0024960 | 4.48478766 | 2.17466111 | 0.03917988 | 0.99965597 |
| circRNA6415 | 2.197226 | 0.97368611 | 0.0240327 | 0.99968986 |  | circRNA6487 | -4.5388647 | 2.14674373 | 0.03448947 | 0.99923803 |  | hsa_circ_0058175 | -4.5047297 | 2.0212545 | 0.0258352 | 0.99965597 |
| circRNA6467 | -1.5244279 | 0.77455195 | 0.04905175 | 0.99968986 |  | circRNA8359 | -4.7211498 | 2.24460888 | 0.03543706 | 0.99923803 |  | hsa_circ_0082415 | 3.18173562 | 1.47931993 | 0.03149123 | 0.99965597 |
| circRNA6473 | -1.1694923 | 0.59019726 | 0.04753211 | 0.99968986 |  | hsa_circ_0001050 | -4.5180859 | 2.15432354 | 0.03597429 | 0.99923803 |  | hsa_circ_0085458 | 3.1241311 | 1.47789788 | 0.03452365 | 0.99965597 |
| circRNA8359 | 4.62875666 | 2.28530985 | 0.04282226 | 0.99968986 |  | hsa_circ_0001355 | 2.09904797 | 1.05078626 | 0.04576032 | 0.99923803 |  |  |  |  |  |  |
| hsa_circ_0000211 | -1.0712091 | 0.50766517 | 0.03485232 | 0.99968986 |  | hsa_circ_0001392 | -2.9416016 | 1.49958243 | 0.04980747 | 0.99923803 |  |  |  |  |  |  |
| hsa_circ_0000651 | 4.58317436 | 2.06511449 | 0.02646416 | 0.99968986 |  | hsa_circ_0001491 | 3.19224714 | 1.40582609 | 0.02316351 | 0.99923803 |  |  |  |  |  |  |
| hsa_circ_0001050 | 4.4416525 | 2.14583037 | 0.03846179 | 0.99968986 |  | hsa_circ_0001498 | -4.6099158 | 2.0809827 | 0.02674229 | 0.99923803 |  |  |  |  |  |  |
| hsa_circ_0001310 | 4.32477257 | 2.05593718 | 0.03541747 | 0.99968986 |  | hsa_circ_0001513 | 4.60000004 | 1.97381477 | 0.01977908 | 0.99923803 |  |  |  |  |  |  |
| hsa_circ_0001441 | 4.7277019 | 1.81004532 | 0.00900341 | 0.99968986 |  | hsa_circ_0001524 | -4.5070852 | 2.01929555 | 0.02561439 | 0.99923803 |  |  |  |  |  |  |
| hsa_circ_0001491 | -3.0196348 | 1.52633291 | 0.04788819 | 0.99968986 |  | hsa_circ_0001541 | 4.2379885 | 2.14092593 | 0.04775839 | 0.99923803 |  |  |  |  |  |  |
| hsa_circ_0002621 | 4.57474374 | 1.94098786 | 0.01842746 | 0.99968986 |  | hsa_circ_0001558 | 5.84116461 | 1.40291937 | 3.13E-05 | 0.06001234 |  |  |  |  |  |  |
| hsa_circ_0002999 | 4.95150791 | 1.75725364 | 0.00483609 | 0.99968986 |  | hsa_circ_0002316 | 4.83526495 | 1.88668191 | 0.01038197 | 0.99923803 |  |  |  |  |  |  |
| hsa_circ_0003823 | 5.77211079 | 1.50224843 | 0.00012188 | 0.46972385 |  | hsa_circ_0002499 | 3.85546722 | 1.74184828 | 0.0268677 | 0.99923803 |  |  |  |  |  |  |
| hsa_circ_0004594 | 2.58603348 | 1.31864918 | 0.04986465 | 0.99968986 |  | hsa_circ_0002854 | -3.0805044 | 1.48237412 | 0.03770122 | 0.99923803 |  |  |  |  |  |  |
| hsa_circ_0005245 | -4.7259567 | 2.24768503 | 0.03550176 | 0.99968986 |  | hsa_circ_0003848 | -3.7920259 | 1.77654567 | 0.03280237 | 0.99923803 |  |  |  |  |  |  |
| hsa_circ_0089834 | -4.7248648 | 1.88887996 | 0.01236996 | 0.99968986 |  | hsa_circ_0004085 | -3.2613762 | 1.49991874 | 0.02967746 | 0.99923803 |  |  |  |  |  |  |
| hsa_circ_0115268 | 5.35772613 | 1.54109334 | 0.00050786 | 0.97865142 |  | hsa_circ_0004368 | -5.1470132 | 1.59502139 | 0.00125129 | 0.798946 |  |  |  |  |  |  |
| hsa_circ_0133691 | -4.6682906 | 2.2766463 | 0.04031449 | 0.99968986 |  | hsa_circ_0006421 | -3.6397167 | 1.80467171 | 0.04371322 | 0.99923803 |  |  |  |  |  |  |
|  |  |  |  |  |  | hsa_circ_0007001 | 1.56747183 | 0.66915385 | 0.01915665 | 0.99923803 |  |  |  |  |  |  |
|  |  |  |  |  |  | hsa_circ_0007360 | 4.25626226 | 2.13654277 | 0.04635724 | 0.99923803 |  |  |  |  |  |  |
|  |  |  |  |  |  | hsa_circ_0051680 | -1.5492222 | 0.716906 | 0.0306966 | 0.99923803 |  |  |  |  |  |  |
|  |  |  |  |  |  | hsa_circ_0067997 | 4.39829949 | 2.10033803 | 0.03625185 | 0.99923803 |  |  |  |  |  |  |
|  |  |  |  |  |  | hsa_circ_0074978 | 4.44524319 | 2.17628477 | 0.04109369 | 0.99923803 |  |  |  |  |  |  |
|  |  |  |  |  |  | hsa_circ_0115268 | -3.5355746 | 1.34201949 | 0.00842568 | 0.99923803 |  |  |  |  |  |  |

**Supplementary material 3.** Identification of dose-dependent differentially expressed RNAs.

**Identification of dd-DELs:**

| gene | 0Gy-1 | 0Gy-2 | 0Gy-3 | 2Gy-1 | 2Gy-2 | 2Gy-3 | 4Gy-1 | 4Gy-2 | 4Gy-3 | Type |
| --- | --- | --- | --- | --- | --- | --- | --- | --- | --- | --- |
| AL031731 | 0 | 0 | 0 | 12 | 16 | 23 | 0 | 8 | 23 | UP |
| MATN1-AS1 | 9 | 10 | 25 | 164 | 12 | 107 | 172 | 147 | 145 | UP |
| AL591845 | 0 | 0 | 0 | 0 | 20 | 33 | 29 | 32 | 21 | UP |
| KDM4A-AS1 | 0 | 0 | 0 | 78 | 6 | 43 | 1 | 57 | 13 | UP |
| AL691482 | 4 | 0 | 2 | 14 | 43 | 16 | 29 | 4 | 40 | UP |
| BMS1P4 | 178 | 65 | 55 | 252 | 105 | 244 | 97 | 255 | 251 | UP |
| A2M-AS1 | 0 | 0 | 0 | 0 | 33 | 48 | 0 | 38 | 58 | UP |
| LINC02821 | 0 | 0 | 0 | 12 | 9 | 21 | 27 | 0 | 10 | UP |
| AL442067 | 0 | 0 | 0 | 59 | 0 | 0 | 0 | 0 | 53 | UP |
| CT62 | 0 | 0 | 0 | 17 | 28 | 8 | 31 | 0 | 33 | UP |
| AC002094 | 0 | 0 | 0 | 0 | 387 | 184 | 276 | 308 | 0 | UP |
| AC145343 | 0 | 0 | 0 | 28 | 6 | 18 | 27 | 0 | 21 | UP |
| AC036176 | 0 | 0 | 0 | 0 | 50 | 0 | 0 | 59 | 0 | UP |
| LINC01106 | 24 | 13 | 29 | 8 | 125 | 167 | 144 | 165 | 16 | UP |
| CYB561D2 | 0 | 3 | 1 | 85 | 4 | 2 | 46 | 0 | 19 | UP |
| PAXIP1-AS2 | 1 | 1 | 0 | 60 | 1 | 0 | 1 | 13 | 32 | UP |
| AC022858 | 1 | 0 | 0 | 12 | 8 | 6 | 3 | 4 | 14 | UP |
| ZMIZ1-AS1 | 182 | 262 | 173 | 47 | 10 | 138 | 26 | 24 | 180 | DOWN |
| AC048341 | 491 | 330 | 189 | 66 | 120 | 230 | 133 | 165 | 137 | DOWN |
| AL161714 | 12 | 2 | 8 | 0 | 1 | 0 | 1 | 0 | 0 | DOWN |
| AC007262 | 38 | 22 | 0 | 0 | 0 | 0 | 0 | 0 | 0 | DOWN |
| AC084782 | 37 | 0 | 13 | 2 | 0 | 0 | 0 | 2 | 0 | DOWN |
| AC005544 | 12 | 17 | 35 | 0 | 0 | 7 | 0 | 0 | 0 | DOWN |
| AC144831 | 213 | 178 | 166 | 49 | 68 | 63 | 68 | 76 | 64 | DOWN |
| LINC01775 | 1 | 22 | 37 | 1 | 1 | 0 | 0 | 1 | 6 | DOWN |
| LINC01535 | 0 | 33 | 50 | 0 | 0 | 0 | 0 | 0 | 0 | DOWN |
| AC245748 | 0 | 5 | 60 | 0 | 0 | 0 | 0 | 0 | 0 | DOWN |
| IGFL2-AS1 | 0 | 60 | 0 | 0 | 0 | 0 | 0 | 0 | 0 | DOWN |
| MHENCR | 42 | 41 | 295 | 29 | 26 | 29 | 22 | 19 | 23 | DOWN |
| CR381653 | 34 | 37 | 46 | 0 | 9 | 5 | 19 | 8 | 16 | DOWN |
| SATB1-AS1 | 7 | 9 | 8 | 0 | 0 | 0 | 0 | 0 | 0 | DOWN |
| AC034139 | 21 | 7 | 18 | 0 | 0 | 0 | 0 | 0 | 0 | DOWN |
| AC093599 | 45 | 36 | 44 | 3 | 17 | 0 | 0 | 12 | 9 | DOWN |
| SLC9A3-AS1 | 0 | 39 | 103 | 0 | 0 | 1 | 0 | 0 | 0 | DOWN |
| LINC01011 | 0 | 0 | 45 | 0 | 0 | 0 | 0 | 0 | 0 | DOWN |
| AL671762 | 47 | 0 | 386 | 0 | 0 | 0 | 0 | 0 | 0 | DOWN |
| HYMAI | 222 | 190 | 30 | 37 | 40 | 28 | 45 | 20 | 53 | DOWN |
| LINC01006 | 12 | 16 | 1 | 0 | 0 | 0 | 0 | 0 | 0 | DOWN |
| AC036214 | 10 | 8 | 3 | 0 | 0 | 0 | 0 | 0 | 0 | DOWN |
| PVT1 | 68 | 1 | 17 | 6 | 2 | 3 | 2 | 3 | 5 | DOWN |
| AL353151 | 12 | 28 | 13 | 0 | 0 | 0 | 0 | 0 | 0 | DOWN |

**Identification of dd-DEMs:**

| gene | 0Gy-1 | 0Gy-2 | 0Gy-3 | 2Gy-1 | 2Gy-2 | 2Gy-3 | 4Gy-1 | 4Gy-2 | 4Gy-3 | Type |
| --- | --- | --- | --- | --- | --- | --- | --- | --- | --- | --- |
| hsa-mir-7108-p3_1ss3GT | 162 | 109 | 133 | 306 | 161 | 134 | 147 | 259 | 124 | UP |
| hsa-mir-7110-p3_1ss18AC | 1392 | 1159 | 1088 | 2342 | 1381 | 1484 | 1329 | 2571 | 1506 | UP |
| hsa-mir-9902-1-p3_1ss13GC | 27 | 13 | 16 | 37 | 34 | 35 | 32 | 55 | 35 | UP |
| mmu-mir-1983-p3_1ss15AT | 106 | 104 | 85 | 201 | 91 | 121 | 106 | 150 | 99 | UP |
| mmu-mir-682-p5 | 28 | 21 | 18 | 51 | 34 | 29 | 25 | 48 | 17 | UP |
| mmu-mir-6240-p5_1 | 970 | 282 | 522 | 994 | 796 | 697 | 681 | 953 | 590 | UP |
| eca-mir-8969-p3_1ss14GT | 47 | 21 | 30 | 62 | 60 | 76 | 55 | 67 | 40 | UP |
| mmu-mir-6240-p5_2 | 970 | 282 | 522 | 994 | 796 | 697 | 681 | 953 | 590 | UP |
| PC-5p-10807_470 | 43 | 48 | 26 | 111 | 49 | 58 | 70 | 96 | 63 | UP |
| PC-5p-24916_144 | 14 | 12 | 15 | 30 | 22 | 15 | 13 | 25 | 14 | UP |
| PC-3p-42589_58 | 0 | 0 | 0 | 9 | 7 | 5 | 16 | 12 | 9 | UP |
| hsa-miR-320e_L+1R-1_1ss18GA | 8 | 6 | 7 | 0 | 0 | 0 | 0 | 0 | 0 | DOWN |
| hsa-miR-548w_R-1 | 5 | 5 | 10 | 0 | 0 | 0 | 0 | 0 | 0 | DOWN |
| hsa-miR-1247-3p_L-3 | 94 | 67 | 92 | 20 | 13 | 26 | 20 | 14 | 9 | DOWN |
| hsa-miR-2116-3p_L+1R-1 | 19 | 28 | 15 | 0 | 0 | 0 | 0 | 5 | 0 | DOWN |
| bta-miR-342_R-3 | 10 | 35 | 10 | 0 | 0 | 0 | 0 | 0 | 0 | DOWN |
| PC-5p-45659_50 | 25 | 16 | 12 | 4 | 0 | 3 | 3 | 3 | 0 | DOWN |
| PC-3p-72339_16 | 11 | 5 | 5 | 0 | 0 | 0 | 0 | 0 | 0 | DOWN |

**Identification of dd-DEGs:**

| gene | 0Gy-1 | 0Gy-2 | 0Gy-3 | 2Gy-1 | 2Gy-2 | 2Gy-3 | 4Gy-1 | 4Gy-2 | 4Gy-3 | Type |
| --- | --- | --- | --- | --- | --- | --- | --- | --- | --- | --- |
| CD6 | 69 | 71 | 63 | 152 | 142 | 132 | 192 | 147 | 164 | UP |
| GNA15 | 4 | 6 | 0 | 22 | 13 | 29 | 16 | 52 | 29 | UP |
| SH2D3C | 23 | 15 | 8 | 39 | 23 | 52 | 54 | 30 | 48 | UP |
| ASB2 | 12 | 12 | 29 | 52 | 40 | 44 | 88 | 68 | 53 | UP |
| RASL12 | 49 | 20 | 46 | 63 | 142 | 95 | 128 | 97 | 109 | UP |
| IGDCC4 | 174 | 167 | 116 | 329 | 329 | 277 | 283 | 383 | 319 | UP |
| NOVA2 | 218 | 282 | 281 | 642 | 519 | 594 | 577 | 637 | 714 | UP |
| LHX3 | 4 | 4 | 0 | 33 | 13 | 10 | 12 | 27 | 21 | UP |
| TLX1 | 27 | 42 | 27 | 107 | 51 | 74 | 130 | 107 | 126 | UP |
| NEURL1 | 64 | 57 | 58 | 176 | 146 | 63 | 177 | 116 | 176 | UP |
| OTOF | 0 | 0 | 10 | 29 | 34 | 30 | 36 | 19 | 34 | UP |
| GJA3 | 51 | 81 | 51 | 104 | 130 | 140 | 152 | 220 | 116 | UP |
| FGD3 | 26 | 8 | 24 | 78 | 72 | 82 | 45 | 53 | 64 | UP |
| ATP1B2 | 58 | 47 | 12 | 79 | 141 | 200 | 141 | 150 | 123 | UP |
| EDA2R | 67 | 65 | 36 | 109 | 94 | 163 | 105 | 146 | 102 | UP |
| RHBG | 15 | 4 | 0 | 25 | 27 | 25 | 68 | 8 | 28 | UP |
| FAIM2 | 19 | 46 | 25 | 155 | 102 | 98 | 92 | 106 | 142 | UP |
| EGR4 | 4 | 0 | 0 | 36 | 28 | 34 | 82 | 49 | 64 | UP |
| CFAP74 | 53 | 26 | 19 | 107 | 73 | 82 | 80 | 55 | 88 | UP |
| KCNN3 | 7 | 12 | 7 | 22 | 28 | 25 | 36 | 32 | 38 | UP |
| PADI4 | 21 | 2 | 12 | 49 | 52 | 24 | 45 | 41 | 62 | UP |
| LRRC38 | 4 | 11 | 7 | 51 | 19 | 33 | 52 | 24 | 19 | UP |
| HEYL | 152 | 79 | 76 | 255 | 252 | 290 | 337 | 302 | 313 | UP |
| GPD1 | 21 | 11 | 15 | 28 | 46 | 64 | 54 | 30 | 37 | UP |
| PTAFR | 18 | 29 | 19 | 55 | 46 | 38 | 47 | 45 | 73 | UP |
| ADCY5 | 248 | 261 | 178 | 542 | 601 | 570 | 643 | 573 | 592 | UP |
| PHOSPHO1 | 19 | 8 | 23 | 34 | 64 | 52 | 67 | 48 | 66 | UP |
| USH1G | 27 | 18 | 48 | 51 | 103 | 86 | 77 | 106 | 54 | UP |
| MAFA | 62 | 48 | 47 | 124 | 139 | 137 | 225 | 91 | 145 | UP |
| EPHA10 | 19 | 16 | 14 | 48 | 33 | 42 | 42 | 27 | 49 | UP |
| GABRD | 109 | 105 | 118 | 279 | 308 | 272 | 261 | 231 | 298 | UP |
| CLCN1 | 0 | 0 | 0 | 8 | 19 | 33 | 15 | 5 | 19 | UP |
| KLRG2 | 44 | 21 | 14 | 59 | 100 | 42 | 45 | 90 | 144 | UP |
| HRNR | 0 | 0 | 0 | 8 | 15 | 19 | 0 | 21 | 16 | UP |
| AVPR1B | 9 | 8 | 0 | 26 | 20 | 23 | 19 | 32 | 37 | UP |
| ARC | 40 | 26 | 37 | 121 | 134 | 163 | 206 | 155 | 180 | UP |
| TM6SF2 | 32 | 23 | 20 | 73 | 48 | 59 | 37 | 81 | 101 | UP |
| FRRS1L | 116 | 112 | 53 | 111 | 132 | 287 | 192 | 270 | 155 | UP |
| SOX8 | 29 | 23 | 29 | 78 | 43 | 49 | 78 | 54 | 55 | UP |
| RRAD | 104 | 143 | 105 | 478 | 359 | 319 | 287 | 251 | 357 | UP |
| ESPN | 25 | 25 | 8 | 97 | 44 | 67 | 102 | 50 | 78 | UP |
| PLEKHG5 | 803 | 876 | 702 | 1737 | 1688 | 1604 | 2153 | 1722 | 1812 | UP |
| SLC52A1 | 105 | 104 | 80 | 266 | 278 | 261 | 215 | 238 | 263 | UP |
| DRAXIN | 64 | 62 | 49 | 217 | 177 | 195 | 176 | 134 | 228 | UP |
| GAS2L2 | 0 | 0 | 0 | 30 | 11 | 0 | 6 | 27 | 12 | UP |
| PPP1R1B | 42 | 20 | 41 | 43 | 106 | 92 | 91 | 88 | 67 | UP |
| HAP1 | 127 | 150 | 188 | 465 | 526 | 387 | 559 | 535 | 502 | UP |
| SAMD14 | 78 | 59 | 178 | 334 | 377 | 386 | 255 | 292 | 522 | UP |
| CRB3 | 32 | 11 | 12 | 111 | 91 | 82 | 112 | 58 | 101 | UP |
| PDE4A | 256 | 317 | 230 | 666 | 622 | 553 | 553 | 604 | 684 | UP |
| GRHL3 | 61 | 33 | 22 | 124 | 103 | 86 | 98 | 105 | 68 | UP |
| SERTAD1 | 2829 | 2815 | 2396 | 5635 | 5514 | 4846 | 6983 | 5531 | 6848 | UP |
| FOSB | 98 | 161 | 118 | 333 | 238 | 274 | 549 | 286 | 300 | UP |
| GPR3 | 207 | 231 | 204 | 500 | 455 | 468 | 789 | 509 | 681 | UP |
| IL11 | 789 | 727 | 586 | 1678 | 1308 | 1384 | 2485 | 1415 | 2568 | UP |
| SMPDL3B | 18 | 15 | 30 | 59 | 47 | 64 | 85 | 81 | 74 | UP |
| GREB1 | 86 | 88 | 49 | 130 | 191 | 136 | 125 | 197 | 165 | UP |
| TLX2 | 24 | 194 | 87 | 383 | 348 | 301 | 443 | 448 | 476 | UP |
| CAMKV | 41 | 37 | 25 | 116 | 53 | 88 | 45 | 85 | 92 | UP |
| CACNA2D2 | 728 | 682 | 382 | 1041 | 988 | 1461 | 1240 | 1488 | 1647 | UP |
| FHIT | 40 | 52 | 27 | 116 | 86 | 98 | 66 | 76 | 110 | UP |
| DOK7 | 67 | 40 | 22 | 119 | 81 | 68 | 92 | 44 | 176 | UP |
| AREG | 18 | 0 | 7 | 60 | 68 | 87 | 34 | 72 | 41 | UP |
| EGR1 | 1182 | 1482 | 1159 | 4438 | 4853 | 5225 | 9625 | 7467 | 6872 | UP |
| NEURL1B | 5746 | 4871 | 4559 | 9269 | 7221 | 13424 | 16523 | 7606 | 8696 | UP |
| PACSIN1 | 124 | 108 | 158 | 373 | 373 | 362 | 348 | 338 | 340 | UP |
| TAF11 | 484 | 423 | 280 | 890 | 1004 | 1194 | 879 | 1279 | 367 | UP |
| ALX3 | 20 | 10 | 9 | 41 | 71 | 33 | 56 | 29 | 55 | UP |
| SLC2A12 | 27 | 66 | 17 | 59 | 93 | 94 | 38 | 125 | 139 | UP |
| FZD9 | 208 | 254 | 223 | 534 | 448 | 491 | 600 | 547 | 466 | UP |
| NPM2 | 33 | 28 | 11 | 67 | 36 | 45 | 60 | 43 | 64 | UP |
| EGR3 | 12 | 0 | 0 | 38 | 21 | 15 | 62 | 78 | 30 | UP |
| NKX2-6 | 34 | 34 | 26 | 69 | 102 | 33 | 61 | 57 | 99 | UP |
| TMOD1 | 13 | 15 | 6 | 45 | 27 | 98 | 41 | 40 | 64 | UP |
| LCE1F | 0 | 0 | 0 | 42 | 34 | 22 | 32 | 15 | 18 | UP |
| NACC2 | 2292 | 3075 | 2350 | 7196 | 8279 | 2760 | 8828 | 8720 | 8037 | UP |
| NECTIN4 | 123 | 106 | 83 | 619 | 461 | 597 | 483 | 340 | 367 | UP |
| ADAMTS4 | 56 | 42 | 37 | 99 | 80 | 107 | 102 | 92 | 136 | UP |
| BTG2 | 740 | 816 | 614 | 2309 | 1994 | 2002 | 1982 | 1995 | 2082 | UP |
| SCUBE2 | 20 | 33 | 10 | 53 | 40 | 47 | 55 | 62 | 87 | UP |
| PLEKHB1 | 87 | 166 | 155 | 393 | 316 | 406 | 387 | 346 | 374 | UP |
| ABCG4 | 110 | 177 | 124 | 268 | 250 | 400 | 445 | 438 | 475 | UP |
| XIAP | 1049 | 1023 | 289 | 1623 | 1842 | 1404 | 1068 | 1780 | 2291 | UP |
| CHAMP1 | 265 | 402 | 203 | 997 | 1092 | 1562 | 1268 | 475 | 748 | UP |
| CFH | 165 | 181 | 102 | 23 | 87 | 97 | 37 | 80 | 53 | DOWN |
| THSD7A | 117 | 125 | 111 | 41 | 37 | 15 | 30 | 34 | 36 | DOWN |
| CASR | 35 | 8 | 0 | 0 | 0 | 0 | 0 | 0 | 0 | DOWN |
| SERPINB3 | 60 | 80 | 10 | 6 | 6 | 12 | 4 | 0 | 23 | DOWN |
| SNCAIP | 258 | 380 | 147 | 56 | 46 | 94 | 75 | 75 | 80 | DOWN |
| DOK5 | 89 | 95 | 40 | 4 | 35 | 34 | 54 | 38 | 21 | DOWN |
| TNFSF13B | 84 | 93 | 25 | 15 | 33 | 21 | 33 | 3 | 5 | DOWN |
| C6orf118 | 8 | 8 | 23 | 0 | 0 | 0 | 0 | 0 | 3 | DOWN |
| CDH6 | 527 | 405 | 219 | 100 | 76 | 130 | 69 | 64 | 102 | DOWN |
| PLCL1 | 71 | 43 | 28 | 16 | 0 | 0 | 4 | 16 | 0 | DOWN |
| SLC16A7 | 680 | 739 | 296 | 185 | 176 | 314 | 175 | 214 | 257 | DOWN |
| C4BPA | 34 | 65 | 47 | 8 | 28 | 12 | 0 | 0 | 12 | DOWN |
| PCSK2 | 97 | 65 | 70 | 18 | 33 | 32 | 39 | 12 | 8 | DOWN |
| ALDH1A2 | 117 | 92 | 107 | 41 | 28 | 44 | 40 | 47 | 21 | DOWN |
| CHRM3 | 131 | 121 | 45 | 44 | 59 | 27 | 44 | 51 | 24 | DOWN |
| ADAMTS8 | 142 | 92 | 93 | 54 | 35 | 44 | 77 | 44 | 17 | DOWN |
| EHF | 225 | 302 | 114 | 71 | 95 | 114 | 29 | 165 | 90 | DOWN |
| SULF1 | 73 | 35 | 44 | 0 | 15 | 19 | 23 | 21 | 24 | DOWN |
| BCL2A1 | 4 | 23 | 22 | 0 | 0 | 4 | 0 | 0 | 0 | DOWN |
| ST6GAL2 | 85 | 70 | 38 | 31 | 25 | 21 | 11 | 30 | 41 | DOWN |
| C1QL2 | 61 | 59 | 81 | 8 | 19 | 11 | 30 | 17 | 21 | DOWN |
| TMEFF2 | 86 | 55 | 87 | 42 | 16 | 38 | 23 | 27 | 15 | DOWN |
| GADL1 | 187 | 106 | 87 | 72 | 21 | 66 | 27 | 58 | 8 | DOWN |
| LGSN | 46 | 22 | 27 | 0 | 8 | 0 | 0 | 9 | 0 | DOWN |
| PTPRO | 155 | 108 | 121 | 25 | 57 | 54 | 78 | 70 | 39 | DOWN |
| GUCY1A2 | 250 | 311 | 132 | 60 | 96 | 91 | 70 | 93 | 87 | DOWN |
| ADGRF4 | 204 | 171 | 173 | 63 | 89 | 91 | 114 | 86 | 75 | DOWN |
| AK5 | 109 | 92 | 77 | 6 | 41 | 64 | 36 | 30 | 82 | DOWN |
| MMP16 | 81 | 98 | 52 | 41 | 29 | 33 | 50 | 12 | 23 | DOWN |
| ADAMTS3 | 138 | 77 | 49 | 22 | 22 | 39 | 19 | 48 | 27 | DOWN |
| ADAMTS9 | 98 | 53 | 57 | 12 | 20 | 16 | 18 | 45 | 31 | DOWN |
| SLITRK5 | 179 | 154 | 133 | 34 | 44 | 64 | 37 | 26 | 44 | DOWN |
| PKD1L2 | 130 | 147 | 127 | 95 | 33 | 59 | 38 | 71 | 39 | DOWN |
| PARM1 | 497 | 477 | 316 | 120 | 165 | 174 | 81 | 133 | 137 | DOWN |
| SCN9A | 37 | 52 | 39 | 12 | 6 | 8 | 18 | 26 | 19 | DOWN |
| PSG6 | 11 | 28 | 8 | 0 | 4 | 0 | 4 | 3 | 4 | DOWN |
| PLAC1 | 46 | 46 | 48 | 8 | 0 | 16 | 26 | 15 | 23 | DOWN |
| VAT1L | 222 | 250 | 113 | 59 | 91 | 102 | 81 | 69 | 66 | DOWN |
| MUC16 | 212 | 207 | 126 | 40 | 37 | 90 | 35 | 74 | 84 | DOWN |
| GRID1 | 77 | 46 | 57 | 14 | 23 | 38 | 30 | 26 | 34 | DOWN |
| PLCXD3 | 134 | 120 | 62 | 17 | 22 | 24 | 24 | 7 | 21 | DOWN |
| GRIN2A | 197 | 191 | 76 | 40 | 64 | 45 | 51 | 23 | 91 | DOWN |
| PSG9 | 50 | 94 | 58 | 35 | 18 | 23 | 4 | 19 | 19 | DOWN |
| PRR16 | 275 | 173 | 157 | 29 | 78 | 99 | 86 | 61 | 86 | DOWN |
| QRFPR | 111 | 129 | 87 | 23 | 12 | 49 | 26 | 34 | 30 | DOWN |
| FAM78B | 136 | 122 | 105 | 30 | 42 | 42 | 26 | 21 | 53 | DOWN |
| IL1RAPL2 | 17 | 8 | 18 | 0 | 0 | 0 | 0 | 0 | 0 | DOWN |
| PCDH18 | 242 | 287 | 135 | 38 | 87 | 94 | 74 | 39 | 38 | DOWN |
| SERPINB4 | 99 | 95 | 43 | 8 | 17 | 12 | 24 | 22 | 20 | DOWN |
| DIO2 | 302 | 291 | 177 | 73 | 91 | 147 | 90 | 132 | 113 | DOWN |
| PSG1 | 156 | 115 | 125 | 12 | 35 | 78 | 64 | 24 | 41 | DOWN |
| GSTA1 | 43 | 29 | 12 | 0 | 0 | 0 | 0 | 4 | 8 | DOWN |
| TMEM179 | 62 | 150 | 65 | 24 | 39 | 31 | 30 | 22 | 46 | DOWN |
| SERPINA4;SERPINA5;AL049839;SERPINA3 | 1255 | 1360 | 882 | 516 | 506 | 454 | 363 | 278 | 364 | DOWN |
| DIO3 | 584 | 591 | 482 | 243 | 199 | 295 | 191 | 216 | 203 | DOWN |
| BMF | 1723 | 1956 | 1588 | 761 | 799 | 696 | 593 | 512 | 393 | DOWN |
| ATP8B4 | 82 | 120 | 78 | 22 | 47 | 51 | 14 | 34 | 26 | DOWN |
| NTRK3 | 214 | 248 | 209 | 45 | 69 | 47 | 35 | 57 | 49 | DOWN |
| ST8SIA2 | 626 | 725 | 416 | 292 | 258 | 218 | 251 | 335 | 248 | DOWN |
| IL21R | 37 | 70 | 42 | 12 | 0 | 0 | 22 | 25 | 3 | DOWN |
| MMP28 | 434 | 436 | 521 | 201 | 171 | 135 | 197 | 140 | 143 | DOWN |
| ARHGAP28 | 338 | 333 | 160 | 107 | 139 | 121 | 89 | 137 | 135 | DOWN |
| ZNF382 | 411 | 447 | 107 | 89 | 136 | 120 | 174 | 81 | 168 | DOWN |
| FPR1 | 30 | 51 | 27 | 4 | 10 | 14 | 0 | 4 | 0 | DOWN |
| MCM6 | 8873 | 8490 | 5320 | 2257 | 2537 | 3221 | 2715 | 2989 | 2998 | DOWN |
| DPP4 | 2060 | 1836 | 1070 | 626 | 707 | 784 | 459 | 723 | 463 | DOWN |
| AOX1 | 1977 | 1692 | 1022 | 551 | 738 | 740 | 752 | 759 | 816 | DOWN |
| NRP2 | 1231 | 1323 | 997 | 527 | 412 | 522 | 518 | 477 | 558 | DOWN |
| IGFBP5 | 13635 | 14249 | 10004 | 4059 | 3368 | 4304 | 3238 | 3348 | 3302 | DOWN |
| UGT1A8;UGT1A10;UGT1A9;UGT1A7;UGT1A6;UGT1A5;UGT1A4;UGT1A3;UGT1A1 | 987 | 1076 | 689 | 446 | 413 | 390 | 385 | 327 | 299 | DOWN |
| BPIFA2 | 78 | 107 | 46 | 26 | 25 | 54 | 37 | 35 | 18 | DOWN |
| BPIFA1 | 948 | 944 | 659 | 352 | 399 | 414 | 326 | 245 | 322 | DOWN |
| EDN2 | 285 | 240 | 174 | 88 | 125 | 84 | 31 | 64 | 19 | DOWN |
| PTGIS | 12488 | 12308 | 10017 | 5007 | 5021 | 4911 | 4003 | 4018 | 4069 | DOWN |
| CYP24A1 | 727 | 916 | 655 | 255 | 368 | 272 | 156 | 192 | 221 | DOWN |
| NKAIN4 | 79 | 53 | 71 | 43 | 12 | 21 | 8 | 21 | 12 | DOWN |
| DERL3 | 579 | 333 | 251 | 184 | 149 | 161 | 162 | 152 | 168 | DOWN |
| CCDC80 | 11835 | 11133 | 8431 | 4662 | 4168 | 5291 | 2737 | 2756 | 2855 | DOWN |
| CP | 387 | 456 | 268 | 141 | 172 | 204 | 154 | 144 | 177 | DOWN |
| RARRES1 | 2397 | 3440 | 1516 | 695 | 685 | 920 | 850 | 650 | 777 | DOWN |
| KANK4 | 1105 | 1144 | 790 | 418 | 460 | 526 | 346 | 375 | 309 | DOWN |
| DDIT4L | 205 | 237 | 105 | 32 | 70 | 97 | 70 | 50 | 42 | DOWN |
| FGB | 451 | 403 | 239 | 103 | 131 | 121 | 67 | 98 | 88 | DOWN |
| FGG | 480 | 464 | 300 | 93 | 117 | 164 | 72 | 192 | 87 | DOWN |
| GASK1B | 1010 | 738 | 543 | 159 | 223 | 266 | 164 | 195 | 100 | DOWN |
| C5orf46 | 133 | 166 | 121 | 38 | 40 | 48 | 31 | 74 | 40 | DOWN |
| TENM2 | 6082 | 5825 | 3871 | 1718 | 1946 | 2244 | 2054 | 2066 | 2014 | DOWN |
| PKIB;Z99129 | 172 | 93 | 101 | 17 | 48 | 68 | 48 | 34 | 68 | DOWN |
| NKAIN2 | 20 | 9 | 10 | 0 | 0 | 0 | 0 | 0 | 4 | DOWN |
| IGFBP3 | 46364 | 22426 | 39565 | 18383 | 13814 | 16921 | 14236 | 13693 | 14625 | DOWN |
| CPA4 | 1478 | 1547 | 1295 | 591 | 563 | 643 | 454 | 567 | 471 | DOWN |
| AKR1B10;AKR1B15 | 4583 | 3294 | 3095 | 1279 | 1356 | 1365 | 969 | 797 | 878 | DOWN |
| JPH1 | 89 | 97 | 85 | 8 | 34 | 34 | 33 | 69 | 28 | DOWN |
| CCNE2 | 1150 | 1079 | 742 | 195 | 339 | 359 | 452 | 635 | 339 | DOWN |
| TNFRSF11B | 216 | 203 | 122 | 53 | 110 | 79 | 85 | 50 | 108 | DOWN |
| SPINK4 | 84 | 119 | 88 | 38 | 29 | 47 | 12 | 8 | 28 | DOWN |
| GCNT1 | 261 | 467 | 851 | 155 | 223 | 212 | 229 | 190 | 176 | DOWN |
| BRINP1 | 666 | 625 | 473 | 223 | 204 | 189 | 178 | 177 | 187 | DOWN |
| SLAMF7 | 1803 | 1779 | 1202 | 219 | 600 | 610 | 378 | 549 | 428 | DOWN |
| ITLN2 | 482 | 447 | 325 | 91 | 126 | 95 | 111 | 131 | 31 | DOWN |
| C1orf21 | 1408 | 1309 | 918 | 410 | 596 | 674 | 548 | 709 | 625 | DOWN |
| G0S2 | 600 | 579 | 464 | 239 | 277 | 242 | 227 | 192 | 251 | DOWN |
| MXRA5 | 46405 | 45825 | 29652 | 15161 | 15345 | 16552 | 14027 | 14812 | 16263 | DOWN |
| CXCL12 | 6407 | 6352 | 4549 | 1861 | 1845 | 2184 | 1323 | 1294 | 1077 | DOWN |
| SAA4;SAA2-SAA4;SAA2;RNA5SP333 | 191 | 149 | 109 | 27 | 71 | 63 | 37 | 58 | 61 | DOWN |
| GLI1 | 242 | 249 | 219 | 129 | 84 | 121 | 134 | 117 | 62 | DOWN |
| UNG | 8722 | 8654 | 6651 | 3127 | 3263 | 3266 | 3298 | 3204 | 3631 | DOWN |
| GABRQ | 6698 | 6433 | 4634 | 2101 | 2374 | 3089 | 2379 | 2731 | 2391 | DOWN |

**Supplementary material 4.** Construction of ceRNA Network in RIEI.

| LncRNA | miRNA | mRNA |
| --- | --- | --- |
| SATB1-AS1 | PC-3p-42589_58 | SLC16A7 |
| SATB1-AS1 | PC-3p-42589_58 | PCSK2 |
| SATB1-AS1 | PC-3p-42589_58 | MMP16 |
| SATB1-AS1 | PC-3p-42589_58 | SLITRK5 |
| SATB1-AS1 | PC-3p-42589_58 | BMF |
| SATB1-AS1 | PC-3p-42589_58 | ST6GAL2 |
| SATB1-AS1 | PC-3p-42589_58 | ITLN2 |
| SATB1-AS1 | PC-3p-42589_58 | NTRK3 |
| SATB1-AS1 | PC-3p-42589_58 | THSD7A |
| SATB1-AS1 | PC-3p-42589_58 | SNCAIP |
| SATB1-AS1 | PC-3p-42589_58 | PTPRO |
| AC036214 | hsa-mir-9902-1-p3_1ss13GC | BRINP1 |
| AC036214 | hsa-mir-9902-1-p3_1ss13GC | NRP2 |
| AC036214 | hsa-mir-9902-1-p3_1ss13GC | MMP16 |
| AC036214 | hsa-mir-9902-1-p3_1ss13GC | VAT1L |
| AC036214 | hsa-mir-9902-1-p3_1ss13GC | PARM1 |
| AC036214 | hsa-mir-9902-1-p3_1ss13GC | PLCXD3 |
| AC036214 | hsa-mir-9902-1-p3_1ss13GC | KANK4 |
| AC036214 | hsa-mir-9902-1-p3_1ss13GC | TNFSF13B |
| AC036214 | hsa-mir-9902-1-p3_1ss13GC | PCDH18 |
| AC036214 | hsa-mir-9902-1-p3_1ss13GC | FGB |
| AC036214 | hsa-mir-9902-1-p3_1ss13GC | DIO3 |
| AC036214 | hsa-mir-9902-1-p3_1ss13GC | GUCY1A2 |
| AL691482 | bta-miR-342_R-3 | RASL12 |
| AL691482 | bta-miR-342_R-3 | GJA3 |
| AL691482 | bta-miR-342_R-3 | IL11 |
| AL691482 | bta-miR-342_R-3 | DRAXIN |
| AL691482 | bta-miR-342_R-3 | CAMKV |
| AL691482 | bta-miR-342_R-3 | FOSB |
| AL691482 | bta-miR-342_R-3 | AVPR1B |
| AL691482 | bta-miR-342_R-3 | HEYL |
| AL691482 | hsa-miR-2116-3p_L+1R-1 | NOVA2 |
| AL691482 | hsa-miR-2116-3p_L+1R-1 | CACNA2D2 |
| AL691482 | hsa-miR-2116-3p_L+1R-1 | KCNN3 |
| AL691482 | hsa-miR-2116-3p_L+1R-1 | SAMD14 |
| AL691482 | hsa-miR-2116-3p_L+1R-1 | GPD1 |
| AL691482 | hsa-miR-2116-3p_L+1R-1 | PHOSPHO1 |
| AL691482 | hsa-miR-2116-3p_L+1R-1 | HAP1 |
| AL691482 | hsa-miR-2116-3p_L+1R-1 | CD6 |
| AL691482 | hsa-miR-2116-3p_L+1R-1 | SH2D3C |
| AL691482 | hsa-miR-2116-3p_L+1R-1 | FGD3 |
| AL691482 | hsa-miR-2116-3p_L+1R-1 | DOK7 |
| AL691482 | hsa-miR-2116-3p_L+1R-1 | NEURL1 |
| AL691482 | hsa-miR-2116-3p_L+1R-1 | NEURL1B |
| AL691482 | hsa-miR-2116-3p_L+1R-1 | EPHA10 |
| AL691482 | hsa-miR-2116-3p_L+1R-1 | GABRD |
| AL691482 | hsa-miR-2116-3p_L+1R-1 | RHBG |
| AL691482 | hsa-miR-2116-3p_L+1R-1 | ADCY5 |
| AL691482 | hsa-miR-2116-3p_L+1R-1 | PDE4A |
| AL691482 | hsa-miR-2116-3p_L+1R-1 | ABCG4 |
| AL691482 | hsa-miR-2116-3p_L+1R-1 | ALX3 |
| AL691482 | hsa-miR-2116-3p_L+1R-1 | PLEKHG5 |
| AC048341 | PC-3p-42589_58 | SLC16A7 |
| AC048341 | PC-3p-42589_58 | PCSK2 |
| AC048341 | PC-3p-42589_58 | MMP16 |
| AC048341 | PC-3p-42589_58 | SLITRK5 |
| AC048341 | PC-3p-42589_58 | BMF |
| AC048341 | PC-3p-42589_58 | ST6GAL2 |
| AC048341 | PC-3p-42589_58 | ITLN2 |
| AC048341 | PC-3p-42589_58 | NTRK3 |
| AC048341 | PC-3p-42589_58 | THSD7A |
| AC048341 | PC-3p-42589_58 | SNCAIP |
| AC048341 | PC-3p-42589_58 | PTPRO |
| SATB1-AS1 | PC-3p-42589_58 | SLC16A7 |
| SATB1-AS1 | PC-3p-42589_58 | PCSK2 |
| SATB1-AS1 | PC-3p-42589_58 | MMP16 |
| SATB1-AS1 | PC-3p-42589_58 | SLITRK5 |
| SATB1-AS1 | PC-3p-42589_58 | BMF |
| SATB1-AS1 | PC-3p-42589_58 | ST6GAL2 |
| SATB1-AS1 | PC-3p-42589_58 | ITLN2 |
| SATB1-AS1 | PC-3p-42589_58 | NTRK3 |
| SATB1-AS1 | PC-3p-42589_58 | THSD7A |
| SATB1-AS1 | PC-3p-42589_58 | SNCAIP |
| SATB1-AS1 | PC-3p-42589_58 | PTPRO |
| SATB1-AS1 | PC-3p-42589_58 | SLC16A7 |
| SATB1-AS1 | PC-3p-42589_58 | PCSK2 |
| SATB1-AS1 | PC-3p-42589_58 | MMP16 |
| SATB1-AS1 | PC-3p-42589_58 | SLITRK5 |
| SATB1-AS1 | PC-3p-42589_58 | BMF |
| SATB1-AS1 | PC-3p-42589_58 | ST6GAL2 |
| SATB1-AS1 | PC-3p-42589_58 | ITLN2 |
| SATB1-AS1 | PC-3p-42589_58 | NTRK3 |
| SATB1-AS1 | PC-3p-42589_58 | THSD7A |
| SATB1-AS1 | PC-3p-42589_58 | SNCAIP |
| SATB1-AS1 | PC-3p-42589_58 | PTPRO |
| SATB1-AS1 | PC-3p-42589_58 | SLC16A7 |
| SATB1-AS1 | PC-3p-42589_58 | PCSK2 |
| SATB1-AS1 | PC-3p-42589_58 | MMP16 |
| SATB1-AS1 | PC-3p-42589_58 | SLITRK5 |
| SATB1-AS1 | PC-3p-42589_58 | BMF |
| SATB1-AS1 | PC-3p-42589_58 | ST6GAL2 |
| SATB1-AS1 | PC-3p-42589_58 | ITLN2 |
| SATB1-AS1 | PC-3p-42589_58 | NTRK3 |
| SATB1-AS1 | PC-3p-42589_58 | THSD7A |
| SATB1-AS1 | PC-3p-42589_58 | SNCAIP |
| SATB1-AS1 | PC-3p-42589_58 | PTPRO |
| SATB1-AS1 | PC-3p-42589_58 | SLC16A7 |
| SATB1-AS1 | PC-3p-42589_58 | PCSK2 |
| SATB1-AS1 | PC-3p-42589_58 | MMP16 |
| SATB1-AS1 | PC-3p-42589_58 | SLITRK5 |
| SATB1-AS1 | PC-3p-42589_58 | BMF |
| SATB1-AS1 | PC-3p-42589_58 | ST6GAL2 |
| SATB1-AS1 | PC-3p-42589_58 | ITLN2 |
| SATB1-AS1 | PC-3p-42589_58 | NTRK3 |
| SATB1-AS1 | PC-3p-42589_58 | THSD7A |
| SATB1-AS1 | PC-3p-42589_58 | SNCAIP |
| SATB1-AS1 | PC-3p-42589_58 | PTPRO |
| SATB1-AS1 | PC-3p-42589_58 | SLC16A7 |
| SATB1-AS1 | PC-3p-42589_58 | PCSK2 |
| SATB1-AS1 | PC-3p-42589_58 | MMP16 |
| SATB1-AS1 | PC-3p-42589_58 | SLITRK5 |
| SATB1-AS1 | PC-3p-42589_58 | BMF |
| SATB1-AS1 | PC-3p-42589_58 | ST6GAL2 |
| SATB1-AS1 | PC-3p-42589_58 | ITLN2 |
| SATB1-AS1 | PC-3p-42589_58 | NTRK3 |
| SATB1-AS1 | PC-3p-42589_58 | THSD7A |
| SATB1-AS1 | PC-3p-42589_58 | SNCAIP |
| SATB1-AS1 | PC-3p-42589_58 | PTPRO |
| SATB1-AS1 | PC-3p-42589_58 | SLC16A7 |
| SATB1-AS1 | PC-3p-42589_58 | PCSK2 |
| SATB1-AS1 | PC-3p-42589_58 | MMP16 |
| SATB1-AS1 | PC-3p-42589_58 | SLITRK5 |
| SATB1-AS1 | PC-3p-42589_58 | BMF |
| SATB1-AS1 | PC-3p-42589_58 | ST6GAL2 |
| SATB1-AS1 | PC-3p-42589_58 | ITLN2 |
| SATB1-AS1 | PC-3p-42589_58 | NTRK3 |
| SATB1-AS1 | PC-3p-42589_58 | THSD7A |
| SATB1-AS1 | PC-3p-42589_58 | SNCAIP |
| SATB1-AS1 | PC-3p-42589_58 | PTPRO |
| SATB1-AS1 | PC-3p-42589_58 | SLC16A7 |
| SATB1-AS1 | PC-3p-42589_58 | PCSK2 |
| SATB1-AS1 | PC-3p-42589_58 | MMP16 |
| SATB1-AS1 | PC-3p-42589_58 | SLITRK5 |
| SATB1-AS1 | PC-3p-42589_58 | BMF |
| SATB1-AS1 | PC-3p-42589_58 | ST6GAL2 |
| SATB1-AS1 | PC-3p-42589_58 | ITLN2 |
| SATB1-AS1 | PC-3p-42589_58 | NTRK3 |
| SATB1-AS1 | PC-3p-42589_58 | THSD7A |
| SATB1-AS1 | PC-3p-42589_58 | SNCAIP |
| SATB1-AS1 | PC-3p-42589_58 | PTPRO |
| AL031731 | hsa-miR-2116-3p_L+1R-1 | NOVA2 |
| AL031731 | hsa-miR-2116-3p_L+1R-1 | CACNA2D2 |
| AL031731 | hsa-miR-2116-3p_L+1R-1 | KCNN3 |
| AL031731 | hsa-miR-2116-3p_L+1R-1 | SAMD14 |
| AL031731 | hsa-miR-2116-3p_L+1R-1 | GPD1 |
| AL031731 | hsa-miR-2116-3p_L+1R-1 | PHOSPHO1 |
| AL031731 | hsa-miR-2116-3p_L+1R-1 | HAP1 |
| AL031731 | hsa-miR-2116-3p_L+1R-1 | CD6 |
| AL031731 | hsa-miR-2116-3p_L+1R-1 | SH2D3C |
| AL031731 | hsa-miR-2116-3p_L+1R-1 | FGD3 |
| AL031731 | hsa-miR-2116-3p_L+1R-1 | DOK7 |
| AL031731 | hsa-miR-2116-3p_L+1R-1 | NEURL1 |
| AL031731 | hsa-miR-2116-3p_L+1R-1 | NEURL1B |
| AL031731 | hsa-miR-2116-3p_L+1R-1 | EPHA10 |
| AL031731 | hsa-miR-2116-3p_L+1R-1 | GABRD |
| AL031731 | hsa-miR-2116-3p_L+1R-1 | RHBG |
| AL031731 | hsa-miR-2116-3p_L+1R-1 | ADCY5 |
| AL031731 | hsa-miR-2116-3p_L+1R-1 | PDE4A |
| AL031731 | hsa-miR-2116-3p_L+1R-1 | ABCG4 |
| AL031731 | hsa-miR-2116-3p_L+1R-1 | ALX3 |
| AL031731 | hsa-miR-2116-3p_L+1R-1 | PLEKHG5 |
| AC036214 | PC-3p-42589_58 | SLC16A7 |
| AC036214 | PC-3p-42589_58 | PCSK2 |
| AC036214 | PC-3p-42589_58 | MMP16 |
| AC036214 | PC-3p-42589_58 | SLITRK5 |
| AC036214 | PC-3p-42589_58 | BMF |
| AC036214 | PC-3p-42589_58 | ST6GAL2 |
| AC036214 | PC-3p-42589_58 | ITLN2 |
| AC036214 | PC-3p-42589_58 | NTRK3 |
| AC036214 | PC-3p-42589_58 | THSD7A |
| AC036214 | PC-3p-42589_58 | SNCAIP |
| AC036214 | PC-3p-42589_58 | PTPRO |
| AL353151 | hsa-mir-9902-1-p3_1ss13GC | BRINP1 |
| AL353151 | hsa-mir-9902-1-p3_1ss13GC | NRP2 |
| AL353151 | hsa-mir-9902-1-p3_1ss13GC | MMP16 |
| AL353151 | hsa-mir-9902-1-p3_1ss13GC | VAT1L |
| AL353151 | hsa-mir-9902-1-p3_1ss13GC | PARM1 |
| AL353151 | hsa-mir-9902-1-p3_1ss13GC | PLCXD3 |
| AL353151 | hsa-mir-9902-1-p3_1ss13GC | KANK4 |
| AL353151 | hsa-mir-9902-1-p3_1ss13GC | TNFSF13B |
| AL353151 | hsa-mir-9902-1-p3_1ss13GC | PCDH18 |
| AL353151 | hsa-mir-9902-1-p3_1ss13GC | FGB |
| AL353151 | hsa-mir-9902-1-p3_1ss13GC | DIO3 |
| AL353151 | hsa-mir-9902-1-p3_1ss13GC | GUCY1A2 |
| LINC01006 | PC-3p-42589_58 | SLC16A7 |
| LINC01006 | PC-3p-42589_58 | PCSK2 |
| LINC01006 | PC-3p-42589_58 | MMP16 |
| LINC01006 | PC-3p-42589_58 | SLITRK5 |
| LINC01006 | PC-3p-42589_58 | BMF |
| LINC01006 | PC-3p-42589_58 | ST6GAL2 |
| LINC01006 | PC-3p-42589_58 | ITLN2 |
| LINC01006 | PC-3p-42589_58 | NTRK3 |
| LINC01006 | PC-3p-42589_58 | THSD7A |
| LINC01006 | PC-3p-42589_58 | SNCAIP |
| LINC01006 | PC-3p-42589_58 | PTPRO |
| AC036214 | PC-3p-42589_58 | SLC16A7 |
| AC036214 | PC-3p-42589_58 | PCSK2 |
| AC036214 | PC-3p-42589_58 | MMP16 |
| AC036214 | PC-3p-42589_58 | SLITRK5 |
| AC036214 | PC-3p-42589_58 | BMF |
| AC036214 | PC-3p-42589_58 | ST6GAL2 |
| AC036214 | PC-3p-42589_58 | ITLN2 |
| AC036214 | PC-3p-42589_58 | NTRK3 |
| AC036214 | PC-3p-42589_58 | THSD7A |
| AC036214 | PC-3p-42589_58 | SNCAIP |
| AC036214 | PC-3p-42589_58 | PTPRO |
| AC036214 | PC-3p-42589_58 | SLC16A7 |
| AC036214 | PC-3p-42589_58 | PCSK2 |
| AC036214 | PC-3p-42589_58 | MMP16 |
| AC036214 | PC-3p-42589_58 | SLITRK5 |
| AC036214 | PC-3p-42589_58 | BMF |
| AC036214 | PC-3p-42589_58 | ST6GAL2 |
| AC036214 | PC-3p-42589_58 | ITLN2 |
| AC036214 | PC-3p-42589_58 | NTRK3 |
| AC036214 | PC-3p-42589_58 | THSD7A |
| AC036214 | PC-3p-42589_58 | SNCAIP |
| AC036214 | PC-3p-42589_58 | PTPRO |
| AC036214 | PC-3p-42589_58 | SLC16A7 |
| AC036214 | PC-3p-42589_58 | PCSK2 |
| AC036214 | PC-3p-42589_58 | MMP16 |
| AC036214 | PC-3p-42589_58 | SLITRK5 |
| AC036214 | PC-3p-42589_58 | BMF |
| AC036214 | PC-3p-42589_58 | ST6GAL2 |
| AC036214 | PC-3p-42589_58 | ITLN2 |
| AC036214 | PC-3p-42589_58 | NTRK3 |
| AC036214 | PC-3p-42589_58 | THSD7A |
| AC036214 | PC-3p-42589_58 | SNCAIP |
| AC036214 | PC-3p-42589_58 | PTPRO |
| AL353151 | hsa-mir-9902-1-p3_1ss13GC | BRINP1 |
| AL353151 | hsa-mir-9902-1-p3_1ss13GC | NRP2 |
| AL353151 | hsa-mir-9902-1-p3_1ss13GC | MMP16 |
| AL353151 | hsa-mir-9902-1-p3_1ss13GC | VAT1L |
| AL353151 | hsa-mir-9902-1-p3_1ss13GC | PARM1 |
| AL353151 | hsa-mir-9902-1-p3_1ss13GC | PLCXD3 |
| AL353151 | hsa-mir-9902-1-p3_1ss13GC | KANK4 |
| AL353151 | hsa-mir-9902-1-p3_1ss13GC | TNFSF13B |
| AL353151 | hsa-mir-9902-1-p3_1ss13GC | PCDH18 |
| AL353151 | hsa-mir-9902-1-p3_1ss13GC | FGB |
| AL353151 | hsa-mir-9902-1-p3_1ss13GC | DIO3 |
| AL353151 | hsa-mir-9902-1-p3_1ss13GC | GUCY1A2 |
| LINC01006 | hsa-mir-9902-1-p3_1ss13GC | BRINP1 |
| LINC01006 | hsa-mir-9902-1-p3_1ss13GC | NRP2 |
| LINC01006 | hsa-mir-9902-1-p3_1ss13GC | MMP16 |
| LINC01006 | hsa-mir-9902-1-p3_1ss13GC | VAT1L |
| LINC01006 | hsa-mir-9902-1-p3_1ss13GC | PARM1 |
| LINC01006 | hsa-mir-9902-1-p3_1ss13GC | PLCXD3 |
| LINC01006 | hsa-mir-9902-1-p3_1ss13GC | KANK4 |
| LINC01006 | hsa-mir-9902-1-p3_1ss13GC | TNFSF13B |
| LINC01006 | hsa-mir-9902-1-p3_1ss13GC | PCDH18 |
| LINC01006 | hsa-mir-9902-1-p3_1ss13GC | FGB |
| LINC01006 | hsa-mir-9902-1-p3_1ss13GC | DIO3 |
| LINC01006 | hsa-mir-9902-1-p3_1ss13GC | GUCY1A2 |
| AC022858 | hsa-miR-548w_R-1 | GREB1 |
| AC022858 | hsa-miR-548w_R-1 | IL11 |
| AC022858 | hsa-miR-548w_R-1 | NACC2 |
| AC022858 | hsa-miR-548w_R-1 | EDA2R |
| AC022858 | hsa-miR-548w_R-1 | FHIT |
| AC145343 | bta-miR-342_R-3 | RASL12 |
| AC145343 | bta-miR-342_R-3 | GJA3 |
| AC145343 | bta-miR-342_R-3 | IL11 |
| AC145343 | bta-miR-342_R-3 | DRAXIN |
| AC145343 | bta-miR-342_R-3 | CAMKV |
| AC145343 | bta-miR-342_R-3 | FOSB |
| AC145343 | bta-miR-342_R-3 | AVPR1B |
| AC145343 | bta-miR-342_R-3 | HEYL |
| AC034139 | hsa-mir-9902-1-p3_1ss13GC | BRINP1 |
| AC034139 | hsa-mir-9902-1-p3_1ss13GC | NRP2 |
| AC034139 | hsa-mir-9902-1-p3_1ss13GC | MMP16 |
| AC034139 | hsa-mir-9902-1-p3_1ss13GC | VAT1L |
| AC034139 | hsa-mir-9902-1-p3_1ss13GC | PARM1 |
| AC034139 | hsa-mir-9902-1-p3_1ss13GC | PLCXD3 |
| AC034139 | hsa-mir-9902-1-p3_1ss13GC | KANK4 |
| AC034139 | hsa-mir-9902-1-p3_1ss13GC | TNFSF13B |
| AC034139 | hsa-mir-9902-1-p3_1ss13GC | PCDH18 |
| AC034139 | hsa-mir-9902-1-p3_1ss13GC | FGB |
| AC034139 | hsa-mir-9902-1-p3_1ss13GC | DIO3 |
| AC034139 | hsa-mir-9902-1-p3_1ss13GC | GUCY1A2 |
